# Supplementary material for: Comorbidities, symptoms and end-of-life medication use in hospitalised decedents before and during the COVID-19 pandemic: a retrospective regional cohort study in Ottawa, Canada
Source: PubMed Central journal article supplement — BMJ Open. 2023 Sep 5;13(9):e075518. doi: 10.1136/bmjopen-2023-075518 (PMC10481717; doi:10.1136/bmjopen-2023-075518), 2023-09-05
Supplement: bmjopen-2023-075518.draft_revisions.pdf [file bmjopen-2023-075518.draft_revisions.pdf]

# BMJ Open

BMJ Open is committed to open peer review. As part of this commitment we make the peer review history of every article we publish publicly available.

When an article is published we post the peer reviewers' comments and the authors' responses online. We also post the versions of the paper that were used during peer review. These are the versions that the peer review comments apply to.

The versions of the paper that follow are the versions that were submitted during the peer review process. They are not the versions of record or the final published versions. They should not be cited or distributed as the published version of this manuscript.

BMJ Open is an open access journal and the full, final, typeset and author-corrected version of record of the manuscript is available on our site with no access controls, subscription charges or pay-per-view fees (<http://bmjopen.bmj.com>).

If you have any questions on BMJ Open's open peer review process please email [info.bmjopen@bmj.com](mailto:info.bmjopen@bmj.com)

# BMJ Open

## Comorbidities, symptoms, and end-of-life medication use in hospitalized decedents before and during the COVID-19 pandemic: a retrospective regional cohort study

|                               |                                                                                                                                                                                                                                                                                                                                                                                                                                                                                                                                                                                                                                                                                                                                                                                                                                                                                                                                                                                                                                                                                                                                                                                                                                                                                                                                                                                                                                                                                                                                                                                                                                                                                                                                                                                                                                                                                                                                                                                 |
|-------------------------------|---------------------------------------------------------------------------------------------------------------------------------------------------------------------------------------------------------------------------------------------------------------------------------------------------------------------------------------------------------------------------------------------------------------------------------------------------------------------------------------------------------------------------------------------------------------------------------------------------------------------------------------------------------------------------------------------------------------------------------------------------------------------------------------------------------------------------------------------------------------------------------------------------------------------------------------------------------------------------------------------------------------------------------------------------------------------------------------------------------------------------------------------------------------------------------------------------------------------------------------------------------------------------------------------------------------------------------------------------------------------------------------------------------------------------------------------------------------------------------------------------------------------------------------------------------------------------------------------------------------------------------------------------------------------------------------------------------------------------------------------------------------------------------------------------------------------------------------------------------------------------------------------------------------------------------------------------------------------------------|
| Journal:                      | <i>BMJ Open</i>                                                                                                                                                                                                                                                                                                                                                                                                                                                                                                                                                                                                                                                                                                                                                                                                                                                                                                                                                                                                                                                                                                                                                                                                                                                                                                                                                                                                                                                                                                                                                                                                                                                                                                                                                                                                                                                                                                                                                                 |
| Manuscript ID                 | bmjopen-2023-075518                                                                                                                                                                                                                                                                                                                                                                                                                                                                                                                                                                                                                                                                                                                                                                                                                                                                                                                                                                                                                                                                                                                                                                                                                                                                                                                                                                                                                                                                                                                                                                                                                                                                                                                                                                                                                                                                                                                                                             |
| Article Type:                 | Original research                                                                                                                                                                                                                                                                                                                                                                                                                                                                                                                                                                                                                                                                                                                                                                                                                                                                                                                                                                                                                                                                                                                                                                                                                                                                                                                                                                                                                                                                                                                                                                                                                                                                                                                                                                                                                                                                                                                                                               |
| Date Submitted by the Author: | 11-May-2023                                                                                                                                                                                                                                                                                                                                                                                                                                                                                                                                                                                                                                                                                                                                                                                                                                                                                                                                                                                                                                                                                                                                                                                                                                                                                                                                                                                                                                                                                                                                                                                                                                                                                                                                                                                                                                                                                                                                                                     |
| Complete List of Authors:     | <p>Lawlor, Peter; University of Ottawa, Medicine<br/> Cohen, Leila; University of Ottawa, Medicine<br/> Adeli, Samantha ; University of Ottawa<br/> Besserer, Ella; University of Toronto<br/> Gratton, Valérie; University of Ottawa, Medicine; Institut du Savoir Montfort<br/> Murphy, Rebekah; University of Ottawa, Medicine<br/> Warmels, Grace; University of Ottawa, Medicine<br/> Bruni, Adrianna; University of Ottawa, Medicine<br/> Kabir, Monisha; Bruyere Research Institute, Palliative Care<br/> Noel, Chelsea; University of Ottawa, Psychology<br/> Anderson, Koby; Bruyere Research Institute, Palliative Care<br/> Heidinger, Brrandon; Bruyere Research Institute, Palliative Care<br/> Arsenault-Mehta, Kyle; University of Ottawa, Psychiatry<br/> Wooller, Krista; Ottawa Hospital, Medicine<br/> Lapenskie, Julie; Bruyère Research Institute; Ottawa Hospital Research Institute<br/> Webber, Colleen; Ottawa Hospital Research Institute, ; Bruyere Research Institute<br/> Bedard, Daniel; Institut du Savoir Montfort<br/> Enright, Paula ; Department of Medicine in Ottawa, Division of Palliative Care<br/> Desjardins, Isabelle; Ottawa Hospital General Campus, Medicine<br/> Bhimji, Khadija; University of Ottawa, Medicine; Queensway Carleton Hospital, Medicine<br/> Dyason, Claire; University of Ottawa, Medicine<br/> Iyengar , Akshai ; University of Ottawa, Medicine<br/> Bush, Shirley H.; University of Ottawa, Division of Palliative Care, Department of Medicine; Bruyere Research Institute, Palliative Care<br/> Isenberg, Sarina; Bruyère Research Institute,<br/> Tanuseputro, Peter; Ottawa Hospital Research Institute; Bruyère Research Institute<br/> Vanderspank-Wright, Brandi; University of Ottawa Faculty of Health Sciences, School of Nursing; Ottawa Hospital Research Institute,<br/> Downar, James; University of Ottawa, Medicine<br/> Parsons, Henrique; University of Ottawa, Department of Medicine</p> |
| Keywords:                     | Adult palliative care < PALLIATIVE CARE, COVID-19, Adult intensive & critical care < INTENSIVE & CRITICAL CARE                                                                                                                                                                                                                                                                                                                                                                                                                                                                                                                                                                                                                                                                                                                                                                                                                                                                                                                                                                                                                                                                                                                                                                                                                                                                                                                                                                                                                                                                                                                                                                                                                                                                                                                                                                                                                                                                  |

1  
2  
3  
4  
5  
6  
7  
8  
9  
10  
11  
12  
13  
14  
15  
16  
17  
18  
19  
20  
21  
22  
23  
24  
25  
26  
27  
28  
29  
30  
31  
32  
33  
34  
35  
36  
37  
38  
39  
40  
41  
42  
43  
44  
45  
46  
47  
48  
49  
50  
51  
52  
53  
54  
55  
56  
57  
58  
59  
60

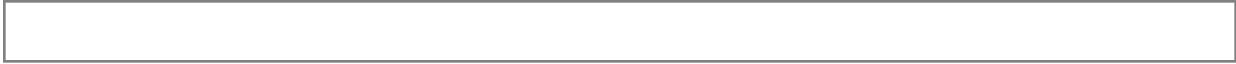

SCHOLARONE™  
Manuscripts

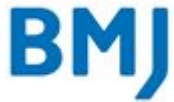

I, the Submitting Author has the right to grant and does grant on behalf of all authors of the Work (as defined in the below author licence), an exclusive licence and/or a non-exclusive licence for contributions from authors who are: i) UK Crown employees; ii) where BMJ has agreed a CC-BY licence shall apply, and/or iii) in accordance with the terms applicable for US Federal Government officers or employees acting as part of their official duties; on a worldwide, perpetual, irrevocable, royalty-free basis to BMJ Publishing Group Ltd ("BMJ") its licensees and where the relevant Journal is co-owned by BMJ to the co-owners of the Journal, to publish the Work in this journal and any other BMJ products and to exploit all rights, as set out in our [licence](#).

The Submitting Author accepts and understands that any supply made under these terms is made by BMJ to the Submitting Author unless you are acting as an employee on behalf of your employer or a postgraduate student of an affiliated institution which is paying any applicable article publishing charge ("APC") for Open Access articles. Where the Submitting Author wishes to make the Work available on an Open Access basis (and intends to pay the relevant APC), the terms of reuse of such Open Access shall be governed by a Creative Commons licence – details of these licences and which [Creative Commons](#) licence will apply to this Work are set out in our licence referred to above.

Other than as permitted in any relevant BMJ Author's Self Archiving Policies, I confirm this Work has not been accepted for publication elsewhere, is not being considered for publication elsewhere and does not duplicate material already published. I confirm all authors consent to publication of this Work and authorise the granting of this licence.

1  
2  
3 **Comorbidities, symptoms, and end-of-life medication use in hospitalized decedents before and during the**  
4 **COVID-19 pandemic: a retrospective regional cohort study**  
5  
6

7 Peter Lawlor DMed FRCPI MMedSc\*

8 Clinician Investigator, Ottawa Hospital Research Institute,

9 Senior Investigator, Bruyère Research Institute

10 Professor, Division of Palliative Care, Dept of Medicine, University of Ottawa

11 [plawlor@bruyere.org](mailto:plawlor@bruyere.org)

12 ORCID ID: 0000-0001-7319-1395 [Corresponding Author]

13  
14  
15  
16  
17  
18  
19  
20 Leila Cohen MD\*

21 Palliative Care Physician, Department Medicine, The Ottawa Hospital

22 [lecohen@toh.ca](mailto:lecohen@toh.ca)

23  
24  
25  
26  
27 Samantha Rose Adeli RD

28 MS2, Class of 2024, Faculty of Medicine, University of Ottawa

29 [sadel029@uottawa.ca](mailto:sadel029@uottawa.ca)

30  
31  
32  
33  
34 Ella Besserer

35 Physician Assistant Student Y2, The University of Toronto Class of 2022

36 [ellabesserer@gmail.com](mailto:ellabesserer@gmail.com)

37  
38  
39  
40  
41 Valérie Gratton MD

42 Assistant Professor, Division of Palliative Care, Department of Medicine, University of Ottawa

43 Palliative Care Physician, Montfort Hospital

44 Clinical Researcher, Institut du Savoir Montfort

45 [valeriegratton@montfort.on.ca](mailto:valeriegratton@montfort.on.ca)

46  
47  
48  
49  
50  
51 Rebekah Murphy MD

52 Palliative Care Physician, Department Medicine, The Ottawa Hospital

53 [RMurphy@bruyere.org](mailto:RMurphy@bruyere.org)

1  
2  
3  
4  
5 Grace Warmels BA MD CCFP(PC)

6 Palliative Care Physician, Department Medicine, The Ottawa Hospital

7  
8 Clinician Investigator, Ottawa Hospital Research Institute; Lecturer, Division of Palliative Care, Department of  
9 Medicine, University of Ottawa

10  
11 [gwarmels@toh.ca](mailto:gwarmels@toh.ca)  
12  
13

14  
15 Adrianna Bruni MD

16 Palliative Care Physician, Department Medicine, The Ottawa Hospital

17  
18 [adbruni@toh.ca](mailto:adbruni@toh.ca)  
19  
20

21  
22 Monisha Kabir

23 Research Associate, Bruyère Research Institute

24  
25 [mkabir3@uottawa.ca](mailto:mkabir3@uottawa.ca)  
26

27 ORCID ID: 0000-0002-4456-7661  
28  
29

30  
31 Chelsea Noel

32 Research Coordinator, Bruyère Research Institute

33  
34 [chelseaannenoel@gmail.com](mailto:chelseaannenoel@gmail.com)  
35  
36

37  
38 Brandon Heidinger

39 Research Coordinator, Bruyère Research Institute

40  
41 [bheidinger2026@meds.uwo.ca](mailto:bheidinger2026@meds.uwo.ca)  
42  
43

44  
45 Koby Anderson

46 Research Assistant, Bruyère Research Institute

47  
48 [KAnderson@bruyere.org](mailto:KAnderson@bruyere.org)  
49  
50

51  
52 Kyle Arsenault-Mehta MD

53 PGY4 Resident in Psychiatry, University of Ottawa

54  
55 [karse056@uottawa.ca](mailto:karse056@uottawa.ca)  
56  
57  
58  
59  
60

1  
2  
3  
4  
5 Krista Wooller MD

6 Physician, Department of Medicine, The Ottawa Hospital

7  
8 Assistant Professor, University of Ottawa

9  
10 [krwooller@toh.ca](mailto:krwooller@toh.ca)

11  
12  
13 Julie Lapenskie MScAH

14 Research Associate and Manager, Ottawa Hospital Research Institute and Bruyère Research Institute

15  
16  
17 [JLapenskie@bruyere.org](mailto:JLapenskie@bruyere.org)

18  
19  
20 Colleen Webber PhD

21 Senior Research Associate, The Ottawa Hospital Research Institute

22  
23  
24 [cwebber@ohri.ca](mailto:cwebber@ohri.ca)

25  
26 ORCID ID: 0000-0001-9193-5386

27  
28  
29 Daniel Bédard MSc

30 Research Associate, Institut du Savoir Montfort

31  
32  
33 [danielbedard@montfort.on.ca](mailto:danielbedard@montfort.on.ca)

34  
35  
36 Paula Enright MD

37 Palliative Care Physician, Department of Medicine, The Ottawa Hospital

38  
39 Assistant Professor, Division of Palliative Care, Department of Medicine, University of Ottawa

40  
41  
42 [penright@toh.ca](mailto:penright@toh.ca)

43  
44  
45 Isabelle Desjardins MD

46 Clinician Educator, Department of Medicine, University of Ottawa

47  
48  
49 [idesjardins@toh.ca](mailto:idesjardins@toh.ca)

50  
51  
52 Khadija Bhimji MSc MD FRCPC

53 Palliative Care Physician, Queensway Carleton Hospital

54  
55 Assistant Professor, Division of Palliative Care, Department of Medicine, University of Ottawa

1  
2  
3 [KBhimji@toh.ca](mailto:KBhimji@toh.ca)  
4  
5

6  
7 Claire Dyason MD

8 Palliative Care Physician, Department of Medicine, Queensway Carleton Hospital

9  
10 Lecturer, Division of Palliative Care, Dept of Medicine, University of Ottawa

11  
12 [cdyason@cmpaottawa.ca](mailto:cdyason@cmpaottawa.ca)  
13  
14

15 Akshai Iyengar MSc MD FRCPC

16 Medical Director, Department of Critical Care Medicine, Queensway Carleton Hospital

17  
18 Assistant Professor, University of Ottawa

19  
20  
21 [aiyengar@qch.on.ca](mailto:aiyengar@qch.on.ca)  
22  
23

24 Shirley H Bush MBBS DRCOG DCH MRCGP PgDip Pall Med FChPM

25 Clinician Investigator, Ottawa Hospital Research Institute and Bruyère Research Institute

26  
27 Associate Professor, Division of Palliative Care, Dept of Medicine, University of Ottawa

28  
29  
30 [sbush@bruyere.org](mailto:sbush@bruyere.org)

31 ORCID ID: 0000-0001-8907-1283  
32  
33

34  
35 Sarina Isenberg MA PhD

36 Bruyère Chair in Mixed Methods Palliative Care Research, Bruyère Research Institute

37  
38 Assistant Professor, Division of Palliative Care, Department of Medicine, University of Ottawa

39  
40 Assistant Professor, Department of Family and Community Medicine, University of Toronto

41  
42 [sisenberg@bruyere.org](mailto:sisenberg@bruyere.org)  
43

44 ORCID ID: 0000-0001-6059-5366  
45  
46

47 Peter Tanuseputro MD

48 Scientist, Clinical Epidemiology Program, Ottawa Hospital Research Institute

49  
50 Investigator, Bruyère Research Institute, Assistant Professor, Division of Palliative Care, Dept of Medicine,  
51 University of Ottawa

52  
53 [ptanuseputro@toh.ca](mailto:ptanuseputro@toh.ca)  
54  
55  
56  
57  
58  
59



1  
2  
3 Brandi Vanderspank-Wright PhD RN CNCC(C)

4 Associate Professor, Faculty of Health Sciences, School of Nursing, University of Ottawa

5  
6 Affiliate Investigator, Ottawa Hospital Research Institute

7  
8 [bvanders@uottawa.ca](mailto:bvanders@uottawa.ca)

9  
10 ORCID ID: 0000-0002-1908-8212

11  
12  
13 James Downar MDCM MHSc

14 Professor, Head of the Division of Palliative Care, Department of Medicine, University of Ottawa

15  
16 Department of Palliative Care, Élisabeth Bruyère Hospital

17  
18 [jdownar@toh.ca](mailto:jdownar@toh.ca)

19  
20 ORCID ID: 0000-0001-7479-1560

21  
22  
23 Henrique Parsons MD MSc

24 Clinician Investigator, Ottawa Hospital Research Institute, Bruyère Research Institute

25  
26 Associate Professor, Division of Palliative Care, Department of Medicine, University of Ottawa

27  
28 [hparsons@toh.ca](mailto:hparsons@toh.ca)

29  
30  
31  
32  
33 **\*Joint first authors**

34  
35  
36  
37 **Corresponding Author Details:**

38 Dr Peter G Lawlor,

39  
40 Bruyère Continuing Care, 43 Bruyère Street, Ottawa, Ontario, Canada K1N 5C8

41  
42 Email: [plawlor@bruyere.org](mailto:plawlor@bruyere.org)

43  
44 Tel: +16135626262

45  
46 Fax: +16135626371

**ABSTRACT**

**Objective:** To compare comorbidities, symptoms, and end-of-life (EoL) palliative medication (anticholinergics, opioids, antipsychotics and sedatives) use among decedents before and during the COVID-19 pandemic.

**Design:** In a retrospective cohort study, decedent records in 3 acute care hospitals were abstracted, generating a pre-pandemic (November 2019-February 2020) group (Pre-COVID) and 2 intra-pandemic (March-August 2020, Wave 1) groups, one without (COVID-ve) and one with COVID-19 infection (COVID+ve). Control group decedents were matched 2:1 on age, sex and care service (Medicine/Intensive Care Unit (ICU)) with COVID+ve decedents.

**Setting:** One quaternary and two tertiary adult regional acute care hospitals

**Participants:** Decedents (N=425): COVID+ve (n=85), COVID-ve (n=170) and Pre-COVID (n=170).

**Main outcome measures:** Data were abstracted regarding demographics, admission comorbidities and symptoms, and EoL medication use; opioid doses were standardized to parenteral morphine equivalent daily dose (MEDD), and the predictors of upper quartile MEDD in the last 24 hours of life were examined in multivariable logistic regression with adjusted odds ratios (aORs) and 95% confidence intervals (CIs).

**Results:** The prevalence of dementia (41% vs 28% and 26%,  $p=0.03$ ), breathlessness (63.5% vs 42% and 47%,  $p<0.01$ ), cough (40% vs 27% and 19%,  $p<0.01$ ) and fever (54% vs 9% and 13.5%) was higher in COVID+ve vs Pre-COVID and COVID-ve groups, respectively. The median (interquartile range) of MEDD over the last 72 hours of life was 16.7, (9-36.5) vs 13.5 (5.7-21.8) and 10.5 (5.3-23.8) for COVID+ve vs Pre-COVID and COVID-ve groups, respectively, ( $p=0.007$ ). Male sex, COVID+ve grouping, ICU death, and high-flow nasal cannula use predicted upper quartile MEDD dose, aORs (CIs): 1.84 (1.05-3.22), 2.62 (1.29-5.3), 5.14 (2.47-10.7) and 1.93 (1.05-3.52), respectively. COVID+ve group decedents used highest lorazepam and propofol doses.

**Conclusions:** COVID-19 decedents, particularly those in ICU, required higher EoL opioid and sedating medication doses than matched pre- or intra-pandemic controls. These findings should inform and guide clinical practice.

**Abstract:** 300 words

**Main manuscript:** 3795 words

1  
2  
3 **Tables:** 4 (plus 2 Supplementary, Appendix 1 and 3)

4  
5 **Figures:** 1 (plus 1 Supplementary, Appendix 2)

6  
7  
8 **Keywords:** COVID-19, adult palliative care, adult intensive & critical care, sedation, medications, opioid, morphine  
9 equivalent daily dose  
10

11  
12  
13  
14  
15  
16 **Strengths and limitations of this study**

- 17  
18  
19  
20  
21  
22  
23  
24  
25  
26  
27  
28  
29  
30  
31  
32  
33  
34  
35  
36  
37  
38  
39  
40  
41  
42  
43  
44  
45  
46  
47  
48  
49  
50  
51  
52  
53  
54  
55  
56  
57  
58  
59  
60
- The decedent cohort was representative of the source population in all adult acute care hospitals in a large urban region, and use of control groups from within and prior to the COVID-19 pandemic facilitated valid and unique comparisons.
  - This study relates to Wave 1 of the pandemic. It is possible that symptom burden, and thus use of symptom control medications, has changed with subsequent waves.
  - Although rigorous training and accuracy checks were conducted in relation to data abstraction, abstractors were not blinded in relation to the study hypothesis, posing a potential source of bias.
  - The study's retrospective design and recording of admission symptom assessment and comorbidity data without similar data, including medication efficacy and side-effects, from within the more immediate end-of-life period are obvious limitations.
  - The generalizability of our study findings is largely limited to end-of-life care for hospitalized decedents, whereas many of the COVID-19 related deaths in Wave 1 of the pandemic occurred in nursing homes.

## INTRODUCTION

Globally, by mid-January 2023, over six million deaths due to COVID-19 (Coronavirus 2019) are reported to have occurred.<sup>1</sup> However, a bigger picture estimate of overall excess mortality due to the COVID-19 pandemic suggests a figure of just over 18 million deaths by the end of 2021.<sup>2</sup> These estimates highlight the need for effective integration of specialist palliative care within hospitals,<sup>3,4</sup> and adoption of a palliative care approach to ensure end-of-life care provision in the COVID-19 pandemic.<sup>5-7</sup> Although the uptake of vaccines has helped to reduce COVID-19 disease severity and mortality,<sup>8</sup> the mortality risk remains higher with chronic medical conditions, socioeconomic deprivation, and in certain ethnic groups.<sup>9,10</sup> Prior to vaccination uptake, earlier in the pandemic, infection with COVID-19 posed a greater risk of hospitalization, Intensive Care Unit (ICU) admission and subsequent death, particularly for older people, those with frailty and chronic medical comorbidities.<sup>11-13</sup>

Among those hospitalized with severe COVID-19 infection, dyspnoea, cough, fatigue, delirium, agitation and myalgia are the most prevalent symptoms.<sup>14-18</sup> Both pharmacological and respiratory support interventions are often required for symptom control.<sup>12,19,20</sup> In caring for those dying of COVID-19 infection, clinicians, particularly those with limited palliative expertise, are often faced with urgent need for information and support,<sup>21,22</sup> and are guided in their use of pharmacological interventions by expert publications and specific guidelines.<sup>6,7,23,24</sup>

Palliative medications used in severe COVID-19 infection include: opioids for pain and dyspnoea; benzodiazepines for anxiety, agitation and dyspnoea; antipsychotics for refractory delirium symptoms; and antisecretory medications for airway secretions.<sup>20</sup> Phenobarbitone and propofol are also used for sedation,<sup>25,26</sup> the latter mainly in ICU settings. However, higher-level evidence derived directly from COVID-19 infected study populations for the efficacy and safety of pharmacological interventions in targeting symptom control is limited.<sup>27</sup> Furthermore, guidelines addressing end-of-life symptom management in the COVID-19 context, for example dyspnoea, are largely informed by primary studies conducted pre-pandemically in patients with either cancer or COPD,<sup>29</sup> raising potential generalizability concerns. There is also a paucity of real world reported data on palliative medication use during the pandemic.<sup>30,31</sup> Although most reports suggest that opioid requirements for end-of-life symptom management in COVID-19 infection are similar to other end-of-life conditions,<sup>28,30,31</sup> some report higher

1  
2  
3 requirements.<sup>32 33</sup> Based on clinical experience, we hypothesized that higher opioid and sedative doses are needed  
4  
5 to control symptoms in hospitalized patients dying of COVID-19 infection.  
6  
7

8 We conducted a study with the primary objective of comparing palliative medication use in the last 72  
9  
10 hours of life among three hospitalized decedent groups: a pre-pandemic group and two groups from Wave 1 of the  
11  
12 pandemic, one who died of COVID-19 infection, and the other who died of other causes without COVID-19  
13  
14 infection. Group comparisons of admission comorbidity and symptom prevalence, and respiratory/circulatory  
15  
16 support use were additional objectives.  
17

## 18 **METHODS**

### 19 *Study design*

20  
21  
22  
23  
24 As part of a larger project on grief and bereavement in the COVID-19 pandemic,<sup>34 35</sup> we conducted a retrospective  
25  
26 multicentre matched cohort study of decedents' documented end-of-life care in acute care hospitals. The study is  
27  
28 reported according to the Strengthening the Reporting of Observational studies in Epidemiology (STROBE)  
29  
30 criteria.<sup>36</sup>  
31

### 32 *Setting*

33  
34  
35 The study population source consisted of inpatients in Ottawa (city and catchment area population 1.4 million),  
36  
37 Canada, who died in the city's three adult acute care hospital sites between November 1, 2019 and August 31,  
38  
39 2020. Site 1, Hôpital Montfort is a tertiary hospital with 289 inpatient beds. Site 2, Queensway-Carleton Hospital is  
40  
41 a tertiary hospital with 264 inpatient beds. Site 3, The Ottawa Hospital is a quaternary hospital with 1271 inpatient  
42  
43 beds. All sites used established electronic health records (EHR) software systems, MEDITECH (Medical Information  
44  
45 Technology, Inc.) at Sites 1 and 2, and Epic (Epic Systems Corporation) at Site 3, in documenting patient care.  
46  
47

### 48 *Key exposures*

49  
50  
51 Between March 1 and August 31, 2020, a total of 85 people died of COVID-19 infection in the region's three acute  
52  
53 care hospitals. The study's key exposures related to COVID-19 infection status during decedents' last hospital  
54  
55 admission and when the admission occurred in relation to the pandemic. Three decedent study groups were  
56  
57  
58  
59  
60

1  
2  
3 identified on the basis of these exposures: a Pre-COVID group who died between November 1<sup>st</sup> 2019 and February  
4 29<sup>th</sup> 2020; and 2 groups who died between March 1<sup>st</sup> 2020 and August 31<sup>st</sup> 2020, within Wave 1 of the pandemic,  
5 one who died of COVID-19 infection, and the other, without any record of COVID-19 during their hospital  
6 admission, designated COVID+ve and COVID-ve, respectively.  
7  
8  
9

### 10 11 12 *Participants*

13  
14 Adult ( $\geq 18$  years old) decedents were included if they died in ICU or under the care of internal medicine in the  
15 designated study period. Both Emergency Department decedents and those primarily under surgical care were  
16 excluded. The index study group was COVID+ve (n=85), and each of these decedents was included. Using a 2: 1  
17 ratio, the control Pre-COVID (n=170) and COVID-ve (n=170) group members were matched with COVID+ve  
18 members at each site on the basis of age ( $\pm 5$  years), sex and care service (Medicine or ICU) at the time of death.  
19  
20  
21  
22  
23  
24

### 25 26 *Data sources/measurement*

27  
28 Anonymized EHR data, including study variables were abstracted by teams of internal/palliative medicine  
29 physicians and two research assistants at each site, and entered into a common electronic study database. All  
30 abstractors received training regarding abstraction requirements. A senior study team member conducted a  
31 duplicate data abstraction of 154 (35%) of the patient records to confirm accuracy of details.  
32  
33  
34  
35  
36

### 37 38 *Variables*

39  
40 Study group designation was based on EHR documentation of COVID-19 infection status, date of death and death  
41 certification. Demographic variables included age, sex, admission referral source, acute care site, care service at  
42 death, and admission duration (days). Based on EHR documentation, comorbidities and symptoms at  
43 admission, and respiratory/circulatory support use during admission, were recorded (Yes/No) by  
44 abstractors, **Supplemental Table, Appendix 1**. Abstractors recorded medications prescribed (yes/no) and  
45 administered (yes/no) in the last 72 hours of life. Administered doses were totalled for each 24-hour interval (T3: >  
46 48 and  $\leq 72$  hours, T2: > 24 and  $\leq 48$  hours, and T1: the last 24 hours of life) within this period, where available,  
47 and recorded for the following: opioids (morphine, fentanyl, hydromorphone), antisecretory medications  
48  
49  
50  
51  
52  
53  
54  
55  
56  
57  
58  
59  
60

1  
2  
3 (glycopyrrolate and hyoscine hydrobromide), antipsychotics (haloperidol and methotrimeprazine),  
4  
5 benzodiazepines (lorazepam and midazolam), other sedating medication (phenobarbitone and propofol). Opioid  
6  
7 doses were recorded in parenteral equivalent using a standard oral to parenteral ratio of 2:1.<sup>37</sup>  
8  
9

#### 10 *Patient and public involvement*

11  
12 Decedents' study data were retrospectively acquired and are part of a project involving the prospective evaluation  
13  
14 of grief in decedents' bereaved family members. Although there was no direct patient or public involvement in the  
15  
16 project's retrospective component, the study team engaged with three knowledge user organizations (Bereaved  
17  
18 Families of Ontario, Canadian Virtual Hospice and Champlain Hospice Palliative Care Program), whose  
19  
20 representatives collaborated with the study planning team and were co-applicants in funding applications for the  
21  
22 overall project.  
23  
24

#### 25 *Ethics*

26  
27  
28 Each hospital's Research Ethics Board (REB) approved the study: Ottawa Health Science Network-REB (20200653-  
29  
30 01H, December 18<sup>th</sup> 2020); Montfort REB (20-21-10-032, December 2<sup>nd</sup> 2020) and Queensway Carleton Hospital  
31  
32 REB (20-06, December 1<sup>st</sup> 2020).  
33  
34

#### 35 *Bias*

36  
37  
38 Data abstractors were not blinded to the study objectives and consequently there was potential for  
39  
40 misclassification bias.  
41  
42

#### 43 *Study size*

44  
45 The sample size (N=425) was predetermined, based on the inclusion of all known Wave 1 deaths due to COVID-19  
46  
47 in the index group (COVID+ve, n=85), and subsequent 2:1 matching to generate the other two study groups.  
48  
49

#### 50 *Quantitative variables*

51  
52 The administered opioid doses abstracted for each 24-hour period in the last 72 hours of life were used to  
53  
54 calculate the parenteral morphine equivalent daily dose (MEDD) in mg using standard equianalgesic ratios.<sup>37</sup>  
55  
56  
57  
58  
59  
60

1  
2  
3 An individual mean total 24-hour medication dose was calculated for palliative medications administered to each  
4 patient who had data for one or more of the 24-hour periods in their last 72 hours of life; the median  
5 (interquartile, Q1-Q3 range) of these individual mean doses was used as an aggregate summary measure in  
6  
7 relation to both opioids (MEDD) and non-opioid medications administered in this period. Also, the maximum 24-  
8  
9 hour dose of opioid, midazolam and propofol within the last 72 hours of life were determined for study group  
10  
11 comparison. Continuous variables were expressed as mean  $\pm$  standard deviation (SD) unless otherwise indicated.  
12  
13  
14

### 15 16 *Statistical methods*

17  
18 Demographic characteristics, palliative care consultation, comorbidities, symptoms, occurrence of medication use,  
19  
20 median group values for individual mean 24-hour doses and MEDD values, and maximum MEDD, midazolam and  
21  
22 propofol doses within the last 72 hours of life were compared among study groups, using a chi-square test for  
23  
24 categorical variables, and an ANOVA or Kruskal-Wallis test for continuous variables, as appropriate. Subgroup  
25  
26 analyses for MEDD at T1 were conducted in relation to site and care service at death. The association of variables  
27  
28 with the upper quartile of MEDD at T1 was examined in unadjusted bivariable and adjusted multivariable logistic  
29  
30 regression analyses, reporting odds ratios and confidence intervals (CIs). Based on clinical relevance and/or having  
31  
32 a p value <0.25 in bivariable analyses, variables were selected for a forced entry multivariable model with adjusted  
33  
34 odds ratios (aORs). Terms were tested in the model for study group, age, sex and care service interactions.  
35  
36 Statistical significance, using Stata (StataCorp. 2015. *Stata Statistical Software: Release 14*. College Station, TX:  
37  
38 StataCorp LP.) for analyses, was set at p<0.05.  
39  
40

## 41 **RESULTS**

### 42 43 *Study sample*

44  
45  
46 The derivation of the study groups is summarized in **Supplemental Figure, Appendix 2**. Data from all COVID+ve  
47  
48 decedents (n=85) and all Pre-COVID (N=170) and COVID-ve (n=170) matched groups were used in comparison of  
49  
50 admission comorbidity and symptom prevalence, and use of respiratory or circulatory support. To enable valid  
51  
52 group comparisons, decedents who died < 24 hours of admission (n=14) were excluded in medication analyses.  
53  
54 Demographic characteristics are summarized in **Table 1**.  
55  
56  
57  
58  
59  
60



Table 1 Demographic characteristics of study groups according to COVID-19 status and time periods

| Demographic characteristics        | Time periods and designated study groups |                              |                             | P values |
|------------------------------------|------------------------------------------|------------------------------|-----------------------------|----------|
|                                    | Nov 2019-Feb 2020                        | Mar 2020 – Aug 2020 (Wave 1) |                             |          |
|                                    | Pre-COVID Group<br>N=170 (%)*            | COVID-ve Group<br>N=170 (%)* | COVID+ve Group<br>N=85 (%)* |          |
| <b>Age</b>                         |                                          |                              |                             |          |
| Years, mean ± SD                   | 79.5 ± 12.3                              | 79.2 ± 12.3                  | 78.9 ± 12.2                 | 0.942    |
| <b>Sex</b>                         |                                          |                              |                             |          |
| Male                               | 100 (58.8)                               | 100 (58.8)                   | 50 (58.8)                   | 1.0      |
| <b>Hospital location</b>           |                                          |                              |                             |          |
| Site 1, n=155, (row %)             | 62 (40)                                  | 62 (40)                      | 31 (20)                     | 1.0      |
| Site 2, n=100, (row %)             | 40 (40)                                  | 40 (40)                      | 20 (20)                     |          |
| Site 3, n=170, (row %)             | 68 (40)                                  | 68 (40)                      | 34 (20)                     |          |
| <b>Care service at death</b>       |                                          |                              |                             |          |
| Medicine service/unit              | 118 (69.4)                               | 122 (71.7)                   | 62 (72.9)                   | 0.814    |
| Intensive Care Unit                | 52 (30.6)                                | 48 (28.2)                    | 23 (27.1)                   |          |
| <b>Admission referral source</b>   |                                          |                              |                             |          |
| Home                               | 99 (58.2)                                | 109 (64.1)                   | 31 (36.5)                   | <0.001   |
| Retirement Home                    | 36 (21.2)                                | 34 (20.0)                    | 11 (11.8)                   |          |
| Nursing Home                       | 22 (12.9)                                | 8 (4.7)                      | 43 (50.6)                   |          |
| Complex Continuing Care            | 2 (1.2)                                  | 2 (1.2)                      | 0 (0.0)                     |          |
| Other                              | 11 (6.5)                                 | 17 (10.0)                    | 1 (1.2)                     |          |
| <b>Admission duration category</b> |                                          |                              |                             |          |
| < 24 hours                         | 7 (4.1)                                  | 7 (4.1)                      | 0 (0)                       | 0.061    |
| ≥ 24 and < 48 hours                | 26 (15.3)                                | 18 (10.6)                    | 6 (7.1)                     |          |
| ≥ 48 hours and < 72 hours          | 16 (9.4)                                 | 8 (4.7)                      | 5 (5.9)                     |          |
| ≥ 72 hours                         | 121 (71.2)                               | 137 (80.6)                   | 74 (87.1)                   |          |

| Palliative care involvement                           |           |           |           |       |
|-------------------------------------------------------|-----------|-----------|-----------|-------|
| Consult requested                                     | 70 (41.2) | 71 (41.8) | 26 (30.6) | 0.184 |
| Consult completed                                     | 67 (39.4) | 67 (39.4) | 25 (29.4) | 0.234 |
| Days from consult completion to death (median, Q1-Q3) | 4 (1-9)   | 3 (1-6)   | 3 (2-12)  | 0.577 |

\* Column numbers refer to number of persons (%) in respective study groups unless stated otherwise

There were no study group differences in age, sex, and care service at death, reflecting effective matching across study sites. Referral from nursing homes was highest (50.6%) in the COVID+ve group, compared to 12.9% and 4.7% in the Pre-COVID and COVID-ve groups, respectively ( $p < 0.001$ ). Palliative care consultation rates were similar across study groups but lowest (29.4%) in the COVID+ve group.

#### *Clinical characteristics*

Admission comorbidities and symptoms in addition to use of respiratory or circulatory support are summarized in **Supplemental Table, Appendix 3**. Atrial fibrillation was less prevalent in the COVID+ve group (15.3%) compared to the Pre-COVID (26.5%) and COVID-ve (32.4%) groups ( $p = 0.015$ ). However, dementia and miscellaneous other comorbidities occurred more frequently (41.2% and 77.7%,  $p = 0.032$  and  $0.018$ , respectively) in the COVID+ve group compared to the Pre-COVID (27.7% and 63.5%, respectively) and COVID-ve groups (25.9% and 60.0%, respectively). In the COVID+ve group compared to other groups, pain occurred less frequently (10.6% vs 29.4% and 28.8%,  $p = 0.002$ ), but breathlessness, (63.5% vs 42.4% and 47.1%,  $p = 0.006$ ), cough (40.0% vs 27.1% and 19.4%,  $p = 0.002$ ) and fever (54.1% vs 9.4% and 13.5%,  $p < 0.001$ ) occurred more frequently. High-flow nasal cannula use was more frequent in the COVID+ve group vs PreCOVID and COVID-ve groups (54.1% vs 37.1% and 28.8%, respectively,  $p < 0.001$ )

#### *Medication use at end-of-life*

Opioids were prescribed for 92.4%, 91.2% and 95.3% of the Pre-COVID, COVID-ve and COVID+ve groups (including those who died < 24 hours of admission, respectively). The median and interquartile MEDD values for study groups in relation to each 24-hour interval (T3, T2 and T1) in which decedents received an opioid, is presented in **Figure 1**, illustrating a progressive increase according to proximity to death, in both the proportion of decedents receiving

opioids and in doses administered. Group comparison of opioid use within the last 72 hours of life is summarized in

**Table 2.**

**Table 2 Comparative inpatient opioid use within the last 72 hours of life among decedent study groups**

| Opioid use in last 72 hours of life                                              | Decedent reference periods and study groups |                              |                             | P values         |
|----------------------------------------------------------------------------------|---------------------------------------------|------------------------------|-----------------------------|------------------|
|                                                                                  | Nov 2019-Feb 2020                           | Mar 2020 – Aug 2020 (Wave 1) |                             |                  |
|                                                                                  | Pre-COVID Group<br>N=163 (%)*               | COVID-ve Group<br>N=163 (%)* | COVID+ve Group<br>N=85 (%)* |                  |
| <b>Type of opioid administered†</b>                                              |                                             |                              |                             |                  |
| Any opioid, n (%)                                                                | 145 (89.0%)                                 | 146 (89.6%)                  | 81 (95.3%)                  | 0.236            |
| Morphine, n (%)                                                                  | 63 (38.7%)                                  | 65 (39.9%)                   | 40 (47.1%)                  | 0.418            |
| Hydromorphone, n (%)                                                             | 92 (56.4%)                                  | 93 (57.1%)                   | 52 (61.2%)                  | 0.758            |
| Fentanyl, n (%)                                                                  | 25 (15.3%)                                  | 15 (9.2%)                    | 6 (7.1%)                    | 0.085            |
|                                                                                  |                                             |                              |                             |                  |
| <b>Total MEDD‡ for each 24-hour period (T3-T1) within last 72 hours of life§</b> |                                             |                              |                             |                  |
| <b>T3: mg (Q1-Q3)</b>                                                            | <b>10.0 (5.0-18.5)</b>                      | <b>10.0 (4.4-20.0)</b>       | <b>14.5 (7.5-48.0)</b>      | <b>0.041</b>     |
| No. of decedents: n (%)                                                          | 83 (50.9%)                                  | 90 (55.2%)                   | 58 (68.2%)                  | 0.032            |
| <b>T2: mg (Q1-Q3)</b>                                                            | <b>8.5 (4.3-18.8)</b>                       | <b>10.0 (5.0-24.0)</b>       | <b>18.3 (11.5-46.0)</b>     | <b>&lt;0.001</b> |
| No. of decedents: n (%)                                                          | 104 (63.8%)                                 | 105 (64.4%)                  | 63 (74.1%)                  | 0.220            |
| <b>T1: mg (Q1-Q3)</b>                                                            | <b>15.0 (6.5-29.8)</b>                      | <b>12.5 (6.3-25.0)</b>       | <b>20.0 (12.0-50)</b>       | <b>0.011</b>     |
| No. of decedents: n (%)                                                          | 137 (84.1%)                                 | 143 (87.7%)                  | 79 (92.9%)                  | 0.133            |
|                                                                                  |                                             |                              |                             |                  |
| <b>T1 MEDD by care service at death</b>                                          |                                             |                              |                             |                  |
| <b>Internal Medicine: mg (Q1-Q3)</b>                                             | 12.3 (5.8-24.5)                             | 10.0 (5.0-20.5)              | 14.5 (8.0-26.3)             | 0.140            |
| No. of decedents: n (subgroup %)                                                 | 96/117 (82.1%)                              | 104/119 (87.4%)              | 56/62 (90.3%)               | 0.265            |
| <b>Intensive Care Unit: mg (Q1-Q3)</b>                                           | <b>25.0 (14.4-49.5)</b>                     | <b>23.8 (10.5-45.0)</b>      | <b>52.5 (31.5-80.0)</b>     | <b>0.014</b>     |
| No. of decedents: n (row %)                                                      | 41/46 (89.1%)                               | 39/44 (88.6%)                | 23/23 (100%)                | 0.245            |
|                                                                                  |                                             |                              |                             |                  |
| <b>T1 MEDD by hospital site</b>                                                  |                                             |                              |                             |                  |
| <b>Site 1: mg (Q1-Q3)</b>                                                        | 15.0 (9.0-27.5)                             | 11.3 (5.0-25.0)              | 16.5 (10.0-45.0)            | 0.199            |
| No. of decedents: n (subgroup %)                                                 | 55/60 (91.6%)                               | 49/57 (86.0%)                | 26/31 (83.9%)               | 0.480            |
| <b>Site 2: mg (Q1-Q3)</b>                                                        | <b>11.0 (5.8-32.5)</b>                      | <b>16.8 (8.0-28.4)</b>       | <b>31.7 (12.8-63.8)</b>     | <b>0.019</b>     |
| No. of decedents: n (subgroup %)                                                 | 32/38 (84.2%)                               | 36/39 (92.3%)                | 20/20 (100.0%)              | 0.130            |

|                                                                                   |                         |                         |                          |              |
|-----------------------------------------------------------------------------------|-------------------------|-------------------------|--------------------------|--------------|
| <b>Site 3: mg (Q1-Q3)</b>                                                         | 16.5 (8.0-33.8)         | 10.5 (6.0-22.5)         | 18.0 (9.0-35.0)          | 0.105        |
| <b>No. of decedents: n (subgroup %)</b>                                           | <b>50/65 (76.0%)</b>    | <b>58/67 (86.6%)</b>    | <b>33/34 (97.1%)</b>     | <b>0.026</b> |
| <b>Patient groups for aggregate MEDD summary measures estimation<sup>ll</sup></b> |                         |                         |                          |              |
| <b>Decedent administered opioid n (%)</b>                                         | 145 (89.0%)             | 146 (89.6%)             | 81 (95.3%)               | 0.236        |
| <b>Internal Medicine: n (subgroup %)</b>                                          | 102/117 (87.2%)         | 105/119 (88.2%)         | 58 (93.6%)               | 0.414        |
| <b>Intensive Care: n (subgroup %)</b>                                             | 43/46 (93.5%)           | 41/44 (93.2%)           | 23/23 (100%)             | 0.444        |
| <b>Aggregate MEDD measures</b>                                                    |                         |                         |                          |              |
| <b>Maximum MEDD: mg (Q1-Q3)</b>                                                   | <b>16.5 (7.5-30.0)</b>  | <b>15.0 (7.5-30.0)</b>  | <b>21.0 (12.0-54.5)</b>  | <b>0.012</b> |
| <b>Internal Medicine: mg (Q1-Q3)</b>                                              | 13.4 (6.0-27.5)         | 11.3 (6.8-22.5)         | 15.7 (8.0-30.0)          | 0.172        |
| <b>Intensive Care: mg (Q1-Q3)</b>                                                 | <b>25.0 (14.4-55.0)</b> | <b>24 (11.3-54.5)</b>   | <b>59.5 (44.8-120.0)</b> | <b>0.005</b> |
| <b>Individual mean MEDD: mg (Q1-Q3)</b>                                           |                         |                         |                          |              |
| <b>Internal Medicine: mg (Q1-Q3)</b>                                              | 10.3 (5.0-17.3)         | 9.4 (4.5-15.0)          | 13.6 (6.7-24.7)          | 0.072        |
| <b>Intensive Care: mg (Q1-Q3)</b>                                                 | <b>20.9 (11.5-38.5)</b> | <b>19.8 (10.0-44.8)</b> | <b>40.0 (24.9-64.2)</b>  | <b>0.009</b> |

\* Column proportions expressed as percentages in parentheses unless otherwise specified.

†Opioid administered to decedents in a minimum of one complete 24-hour admission period within the last 72 hours of life; data were excluded for 7 decedents each in the Pre-COVID and COVID-ve groups whose admission duration was < 24 hours.

‡MEDD: Morphine Equivalent Daily Dose, parenteral, mg; summarized as a median (interquartile range, Q1-Q3) value for each of the three decedent study groups.

§Designation based on hours before death: T3, > 48 and ≤ 72 hours; T2, > 24 and ≤ 48 hours; T1, last 24 hours as an inpatient

|| Based on exposure to a minimum of one complete inpatient 24-hour admission period (T3, T2 or T1) for opioid dose administration. Aggregate measures are reported as median group values (interquartile range, Q1-Q3)

Although more COVID+ve group patients (68.2% vs 50.9% and 55.2%, p=0.032) received opioids in the T3 period, there were no other significant study group differences in opioid administration as a binary (yes/no) outcome, specifically in comparisons based on opioid type, T2 or T1 period MEDDs, care service at death, hospital site, or with reference to the 72-hour aggregate summary measures (individual mean and maximum dose). However, the

1  
2  
3 median MEDD in the COVID+ve group at T1 was 20.0 (12.0-50.0) compared to 15.0 (6.5-29.8) and 12.5 (6.3-25.0) in  
4 the Pre-COVID and COVID-ve groups, respectively (p=0.011). This group difference in MEDD was consistent at each  
5 time point (T3-T1) and in relation to 72-hour aggregate summary measures. A site subgroup analysis at T1 revealed  
6 higher median MEDD in the COVID+ve group at Site 2. An additional subgroup analysis at T1 revealed a higher  
7 median MEDD in the COVID+ve group decedents who died in ICU but not in those who died in Medicine  
8 units/wards; a similar difference was also found in relation to the aggregate measures of opioid administration  
9 over the last 72 hours of life. The independent association of variables with MEDD was examined in multivariable  
10 logistic regression.  
11  
12

13  
14  
15  
16  
17  
18  
19  
20 The logistic regression analyses examining the predictors of the T1 MEDD upper quartile ( $\geq 30$ mg of  
21 parenteral morphine) are summarized in **Table 3**.

22  
23  
24  
25 **Table 3** Logistic regression analyses examining the association of variables with parenteral MEDD  $\geq 30$ mg (upper  
26 quartile) in the last 24 hours of life in those who received opioids (n=359)  
27  
28

| Variables examined           | Proportion of patients* (%) | Unadjusted OR <sup>†</sup> (95% CI) |             | P value | Adjusted OR <sup>†</sup> (95% CI) |             | P value |
|------------------------------|-----------------------------|-------------------------------------|-------------|---------|-----------------------------------|-------------|---------|
| Age of decedent <sup>‡</sup> | ...                         | 0.951                               | (0.93-0.97) | <0.001  | 0.99                              | (0.96-1.01) | 0.313   |
| Sex                          |                             |                                     |             |         |                                   |             |         |
| Female                       | 31/155 (20.0)               | 1                                   |             |         | 1                                 |             |         |
| Male                         | 64/204 (31.4)               | 1.82                                | (1.12-2.99) | 0.016   | 1.84                              | (1.05-3.22) | 0.034   |
| Study group                  |                             |                                     |             |         |                                   |             |         |
| Pre-COVID                    | 34/137 (24.8)               | 1                                   |             |         | 1                                 |             |         |
| COVID-ve                     | 30/143 (21.0)               | 0.804                               | (0.46-1.41) | 0.445   | 0.95                              | (0.51-1.76) | 0.866   |
| COVID+ve                     | 31/79 (39.2)                | 1.96                                | (1.08-3.55) | 0.027   | 2.62                              | (1.29-5.32) | 0.008   |
| Hospital site                |                             |                                     |             |         |                                   |             |         |
| Site 1                       | 32/130 (24.6)               | 1                                   |             |         | 1                                 |             |         |

|                                         |                      |              |                    |                  |             |                     |                  |
|-----------------------------------------|----------------------|--------------|--------------------|------------------|-------------|---------------------|------------------|
| <b>Site 2</b>                           | 27/88 (30.7)         | 1.36         | (0.74-2.48)        | 0.323            | 0.83        | (0.40-1.72)         | 0.617            |
| <b>Site 3</b>                           | 36/141 (25.5)        | 1.05         | (0.61-1.82)        | 0.862            | 0.51        | (0.25-1.05)         | 0.067            |
| <b>Care service at death</b>            |                      |              |                    |                  |             |                     |                  |
| <b>Medicine</b>                         | 45/256 (17.6)        | 1            |                    |                  | 1           |                     |                  |
| <b>ICU</b>                              | <b>50/103 (48.5)</b> | <b>4.42</b>  | <b>(2.68-7.31)</b> | <b>&lt;0.001</b> | <b>5.14</b> | <b>(2.47-10.70)</b> | <b>&lt;0.001</b> |
| <b>High-Flow Nasal Cannula</b>          |                      |              |                    |                  |             |                     |                  |
| <b>No</b>                               | 46/219 (21.0)        | 1            |                    |                  |             |                     |                  |
| <b>Yes</b>                              | <b>49/140 (35.0)</b> | <b>2.03</b>  | <b>(1.26-3.26)</b> | <b>0.004</b>     | <b>1.93</b> | <b>(1.05-3.52)</b>  | <b>0.033</b>     |
| <b>Palliative Care Consult</b>          |                      |              |                    |                  |             |                     |                  |
| <b>No</b>                               | 61/211 (28.9)        | 1            |                    |                  | 1           |                     |                  |
| <b>Consult completed</b>                | 34/148 (23.0)        | 0.733        | (0.45-1.19)        | 0.210            | 1.51        | (0.80-2.86)         | 0.205            |
| <b>Admission assessment<sup>§</sup></b> |                      |              |                    |                  |             |                     |                  |
| <b>Cognitive status</b>                 |                      |              |                    |                  |             |                     |                  |
| <b>Not impaired</b>                     | 71/229 (31.0)        | 1            |                    |                  | 1           |                     |                  |
| <b>Impaired</b>                         | <b>24/130 (18.5)</b> | <b>0.504</b> | <b>(0.30-0.85)</b> | <b>0.010</b>     | 0.85        | 0.46-1.57           | 0.606            |
| <b>Documented pain</b>                  |                      |              |                    |                  |             |                     |                  |
| <b>No</b>                               | 69/264 (26.0)        | 1            |                    |                  | 1           |                     |                  |
| <b>Yes</b>                              | 26/95 (27.4)         | 1.07         | (0.63-1.81)        | 0.815            | 1.48        | (0.80-2.74)         | 0.209            |
| <b>Active cancer</b>                    |                      |              |                    |                  |             |                     |                  |
| <b>No</b>                               | 67/275 (24.4)        | 1            |                    |                  | 1           |                     |                  |
| <b>Yes</b>                              | 28/84 (33.3)         | 1.55         | (0.91-2.64)        | 0.104            | 1.68        | (0.88-3.18)         | 0.114            |
| <b>Chronic Kidney disease</b>           |                      |              |                    |                  |             |                     |                  |
| <b>No</b>                               | 75/283 (26.5)        | 1            |                    |                  |             |                     |                  |
| <b>Yes</b>                              | 20/76 (26.3)         | 0.991        | (0.56-1.76)        | 0.974            |             |                     |                  |
| <b>Agitation</b>                        |                      |              |                    |                  |             |                     |                  |

|            |               |       |             |       |  |  |  |
|------------|---------------|-------|-------------|-------|--|--|--|
| <b>No</b>  | 89/330 (27.0) | 1     |             |       |  |  |  |
| <b>Yes</b> | 6/29 (20.7)   | 0.706 | (0.28-1.79) | 0.464 |  |  |  |

\*Proportion of patients in upper quartile MEDD ( $\geq 30$  mg of parenteral morphine) for T1 period (last 24 hours of life); †OR = Odds Ratio; ‡Treated as a continuous variable or covariate; §Documented on admission assessment.

In the unadjusted analyses, both older age and cognitive impairment were statistically significant negative predictors of the upper quartile MEDD, whereas male sex, COVID+ve group membership, death in ICU, and use of high-flow nasal cannula for oxygen delivery were positive predictors. In the multivariable model, only male sex, COVID+ve group membership, death in ICU, and use of high-flow nasal cannula remained statistically significant, all as positive predictors with aORs of 1.84 (1.05-3.22), 2.62 (1.29-5.3), 5.14 (2.47-10.7) and 1.93 (1.05-3.52), respectively. Potential variable interactions among COVID-19 study group status, age, sex and care service at death were tested in the model, and the interaction terms were not statistically significant.

Comparative non-opioid medication doses (mg) administered within the last 72 hours of life for the study groups are summarized in **Table 4**.

**Table 4 Comparative inpatient use of non-opioid End-of-Life medications within the last 72 hours of life among decedent study groups**

| Non-opioid medications administered in the last 72 hours of life * | Decedent reference periods and study groups |                              |                            | P values |
|--------------------------------------------------------------------|---------------------------------------------|------------------------------|----------------------------|----------|
|                                                                    | Nov 2019-Feb 2020                           | Mar 2020 – Aug 2020 (Wave 1) |                            |          |
|                                                                    | Pre-COVID Group†<br>N=163 (%)               | COVID-ve Group†<br>N=163 (%) | COVID+ve Group<br>N=85 (%) |          |
| <b>Antisecretory medications</b>                                   |                                             |                              |                            |          |
| <b>Glycopyrrolate, n (%)</b>                                       | 36 (22.1)                                   | 37 (22.7)                    | 12 (14.1)                  | 0.243    |
| <b>Mean 24-hour dose, mg‡</b>                                      | 0.5 (0.4-0.9)                               | 0.6 (0.4-1.2)                | 0.4 (0.4-0.6)              | 0.570    |
| <b>Scopolamine, n (%)</b>                                          | 20 (12.3)                                   | 21 (12.9)                    | 14 (16.5)                  | 0.635    |
| <b>Mean 24-hour dose, mg‡</b>                                      | 0.4 (0.4-0.9)                               | 0.4 (0.4-0.8)                | 0.5 (0.4-1.0)              | 0.909    |
| <b>Antipsychotic medications</b>                                   |                                             |                              |                            |          |

|                                     |                                        |                                        |                                         |              |
|-------------------------------------|----------------------------------------|----------------------------------------|-----------------------------------------|--------------|
| <b>Haloperidol, n (%)</b>           | 32 (19.6)                              | 25 (15.3)                              | 10 (11.8)                               | 0.257        |
| <b>Mean 24-hour dose, mg‡</b>       | 1.0 (0.5-1.3)                          | 1.0 (0.5-1.5)                          | 1.4 (0.7-4.5)                           | 0.656        |
| <b>Methotrimeprazine, n (%)</b>     | 37 (22.7)                              | 40 (24.5)                              | 26 (30.6)                               | 0.389        |
| <b>Mean 24-hour dose, mg‡</b>       | 10 (6.3-22.5)                          | 11.7 (6.9-24.4)                        | 11.3 (5.0-25.0)                         | 0.947        |
| <b>Benzodiazepines</b>              |                                        |                                        |                                         |              |
| <b>Lorazepam, n (%)</b>             | 19 (11.7)                              | 17 (10.4)                              | 7 (8.2)                                 | 0.705        |
| <b>Mean 24-hour dose, mg‡</b>       | <b>1.0 (0.5-1.5)</b>                   | <b>1.5 (1.0-2.3)</b>                   | <b>3.7 (1.5-25.0)</b>                   | <b>0.017</b> |
| <b>Midazolam, n (%)</b>             | 96 (58.9)                              | 100 (61.4)                             | 57 (67.1)                               | 0.454        |
| <b>Mean 24-hour dose, mg‡</b>       | 3.7 (1.5-12.5)                         | 3.0 (1.5-11.3)                         | 5.7 (2.0-19.0)                          | 0.255        |
| <b>Maximum 24-hour dose, mg‡</b>    | 4.3 (2.0-13.5)                         | 4.0 (1.7-13.0)                         | 7.0 (2.0-22.0)                          | 0.199        |
| <b>Other sedating medications</b>   |                                        |                                        |                                         |              |
| <b>Phenobarbitone, n (%)</b>        | 4 (2.5)                                | 6 (3.7)                                | 5 (5.9)                                 | 0.393        |
| <b>Mean 24-hour dose, mg‡</b>       | 150.0 (90.0-210.0)                     | 127.5 (90.0-140.0)                     | 150.0 (75.0-180)                        | 0.811        |
| <b>Propofol administered, n (%)</b> | 21 (12.9)                              | 28 (17.2)                              | 13 (15.3)                               | 0.555        |
| <b>Mean 24-hour dose, mg‡</b>       | 1078.5<br>(692.5-1984.0)               | 1329.2<br>(634.0-2811.6)               | 1887.5<br>(1337.5-5527.3)               | 0.080        |
| <b>Maximum 24-hour dose, mg‡</b>    | <b>1444.8</b><br><b>(692.5-2207.0)</b> | <b>1624.4</b><br><b>(851.0-3491.5)</b> | <b>2665.6</b><br><b>(2119.4-6304.0)</b> | <b>0.033</b> |

\*Based on exposure to a minimum of at least one full inpatient 24-hour period for mean 24-hour dose determination within the last 72 hours of life.

†Data were excluded for 7 decedents in each of the original Pre-COVID and COVID-ve groups due to admission duration < 24 hours

‡Individual mean 24-hour doses are summarized for the study group as a median (interquartile range) value for each of the three study groups.

Although both mean and maximum 24-hour doses of midazolam were higher in the COVID+ve group, the differences were not statistically different. The median lorazepam COVID+ve group dose, 3.7 (1.5-25.0) was higher than that of the Pre-COVID and COVID-ve groups, 1.0 (0.5-1.5) and 1.5 (1.0-2.3), respectively (p=0.17). Similarly, the



1  
2  
3 median of the maximum propofol dose, 2665.6 (2119.4-6304.0) was higher than that of the Pre-COVID and COVID-  
4 ve groups, 1444.8 (692.5-2207.0) and 1624.4 (851.0-3491.5), respectively (p=0.033).  
5  
6

## 7 **DISCUSSION**

### 8 *Study findings and putative explanations*

9  
10  
11  
12  
13 Our study found that COVID+ve decedents received significantly higher opioid doses than matched pre-pandemic  
14 or intra-pandemic control patients. This finding was moderately robust: it was consistent in each 24-hour time  
15 period within the last 72 hours of life, and further bolstered by finding that dying of COVID-19 was independently  
16 associated (aOR=2.6) with a parenteral MEDD  $\geq$ 30mg in the last 24 hours of life. COVID+ve decedents had  
17 significantly higher maximum 24-hour propofol use in ICU compared to control group decedents. Also, higher  
18 lorazepam and midazolam doses were used in the COVID+ve group than either of the other groups; the difference  
19 was only statistically significant in relation to lorazepam. Collectively, these findings regarding opioid and sedative  
20 use support our study hypothesis that the requirement for these medications is higher in hospitalized patients  
21 dying of COVID-19 infection. In subgroup analyses, COVID+ve ICU decedents had significantly higher opioid use  
22 than ICU decedents in either of the control groups, which was evident in the last 24 hours (T1) and over the last 72  
23 hours of life, suggesting that dying in ICU with COVID-19 infection is particularly associated with increased opioid  
24 and propofol requirements. These findings warrant a symptom profile evaluation of those dying of COVID-19.  
25  
26  
27  
28  
29  
30  
31  
32  
33  
34  
35  
36  
37

38 Although our study patients' comfort in the last 72 hours of life was regularly assessed and documented,  
39 there was no formal standardized recording of symptom intensity across sites. For symptom profile comparisons  
40 we used the admission documentation of symptoms, which fell within the last 72 hours of life for approximately  
41 20% of the study sample. The COVID +ve group had significantly higher admission prevalence of breathlessness,  
42 cough, and fever, and used high-flow nasal cannula oxygen support more frequently during admission. Previous  
43 studies have found that breathlessness is a major symptom in patients dying with COVID-19 infection.<sup>15 16 31 38-40</sup>  
44  
45 Although myalgic pain is reported in those dying of COVID-19 infection,<sup>15</sup> among our three study groups, pain was  
46 least frequent in COVID+ve decedents at admission, but higher prevalence could have occurred closer to death.  
47  
48 High-flow nasal cannula use was independently associated (aOR=1.9) with a parenteral MEDD  $\geq$ 30mg in the last 24  
49  
50  
51  
52  
53  
54  
55  
56  
57  
58  
59  
60

1  
2  
3 hours of life. Collectively, our results suggest that respiratory distress mediated higher opioid use in the COVID-  
4 +ve group, particularly in ICU decedents. Agitation and delirium are reported in patients dying of COVID-19  
5 infection.<sup>14 18 31 33 40</sup> Although the admission prevalence of agitation was largely similar across our groups,  
6 subsequent group differences in agitation level could have arisen nearer to death. Furthermore, COVID+ve group  
7 decedents had a higher admission prevalence of dementia and other comorbidity burden, both risk factors for  
8 delirium.<sup>41</sup> The higher lorazepam and maximum 24-hour propofol doses in our COVID+ve group were possibly due  
9 to COVID-19 related respiratory distress in addition to potential contributions of cognitive dysfunction with  
10 agitation, and greater comorbidity-related distress.  
11  
12  
13  
14  
15  
16  
17  
18

#### 19 *Study findings in the context of published data*

20  
21 Although atrial fibrillation is a risk factor for mortality in high-risk COVID-19 patients,<sup>42</sup> it was least prevalent in our  
22 COVID+ve study group. Meanwhile, the higher COVID+ve group admission prevalence of cognitive impairment and  
23 other comorbidities were largely consistent with published data on COVID-19 risk factors.<sup>11 17</sup> Similarly, the higher  
24 prevalence of respiratory symptoms and fever is consistent with reported end-of-life prevalence in COVID-19  
25 deaths.<sup>12 14 17</sup> Literature comparison of palliative medication use in patients dying due to COVID-19 infection is  
26 limited by paucity of data, particularly on ICU deaths, and further compromised by differences in type of aggregate  
27 dose measures reported, time reference, care setting, regional medication formularies, and in the separate  
28 reporting of pro re nata (PRN) or “as needed” medication use in addition to continuous infusional use.<sup>28</sup> We  
29 reported the total daily medication use which included regularly scheduled and PRN doses, or solely PRN doses in  
30 the absence of scheduled dosing. Although antisecretory and antipsychotic medication use was similar across all of  
31 our study groups, and comparable to published estimates in COVID-19 deaths,<sup>28 30 31</sup> our findings regarding opioid  
32 and benzodiazepine use warrant more detailed evaluation in the context of published data.  
33  
34  
35  
36  
37  
38  
39  
40  
41  
42  
43  
44  
45

46 A systematic review of symptom management in COVID-19 related deaths, which excluded ICU deaths,<sup>28</sup>  
47 concluded that although a higher proportion of those dying with COVID-19 infection required continuous  
48 administration of opioid or midazolam than previously reported in pre-COVID-19 palliative care, doses were  
49 relatively low (median of 10-15 mg of parenteral morphine, and 10mg of midazolam, in the last 24 hours of life, in  
50 an aggregate dose summary of 5 of the studies) and in keeping with published guidelines.<sup>24</sup> A study of COVID-19  
51  
52  
53  
54  
55  
56  
57  
58  
59  
60

1  
2  
3 deaths in a hospital palliative care unit in New York reported a median parenteral MEDD (range) of 48 (24-144) mg  
4  
5 in the last days of life.<sup>33</sup> A Belgian study of hospitalized COVID-19 decedents, excluded ICU deaths, and reported a  
6  
7 mean parenteral MEDD of 31.3 (range, 2-120) mg, and mean midazolam dose of 20.4 (range, 1-100) mg in the last  
8  
9 24 hours of life.<sup>32</sup> An Australian study of hospitalized COVID-19 decedents, including 9 (4%) who died in ICU,  
10  
11 reported a median (Q1-Q3) oral MEDD of 45 (22.5-75.0) in the last day before death.<sup>31</sup> Our study's higher MEDD  
12  
13 findings in the COVID+ve group were comparable to this study; the inclusion of ICU decedents with possibly higher  
14  
15 levels of symptom distress in our study could explain the higher opioid and sedative doses than those reported in  
16  
17 the systematic review by Heath et al.<sup>28</sup> The progressive MEDD increase in the COVID+ve group over the last 72  
18  
19 hours is consistent with a longitudinal study reporting a doubling of median daily opioid use in the last 7 days of  
20  
21 life in COVID-19 decedents.<sup>31</sup> Our finding of an independent association between male sex and higher opioid  
22  
23 dosing is difficult to explain, as larger pre-pandemic studies have not reported a sex difference in relation to opioid  
24  
25 dosing.<sup>43,44</sup> Although male sex is a recognized mortality-related risk factor in COVID-19 infection,<sup>11,45</sup> a statistically  
26  
27 significant interaction between sex and study group status was not detected in the model.

28  
29 Although 67.1% of the COVID+ve group received midazolam in the last 72 hours of life, the daily  
30  
31 midazolam dose estimates in this period were lower than the 10 mg estimate reported in a systematic review.<sup>28</sup>  
32  
33 Although palliative care involvement was similar across our study groups, the completion of a consult in only  
34  
35 29.4% of the COVID+ve group is below the 39-51% range reported in other studies of COVID-19 decedents,<sup>3,31</sup> and  
36  
37 possibly impacted the prescribing patterns of some medications used for end-of-life symptom control.

#### 38 39 *Study implications and future research*

40  
41 In addition to informing end-of-life guidelines on medication use for symptom management in COVID-19 infection  
42  
43 and in future pandemics, our study findings warrant further research, particularly regarding the use of opioids and  
44  
45 sedatives in the ICU setting. Moreover, regarding end-of-life comfort assessment, our study highlights the need for  
46  
47 standardized symptom assessment measures such as the palliative version of the Richmond Agitation-Sedation  
48  
49 Scale (RASS-PAL),<sup>46</sup> which can be used to evaluate medication efficacy and audit quality of care. Specialist palliative  
50  
51 care involvement in end-of-life care of hospitalized individuals warrants further study both in relation to predictors  
52  
53 and outcomes.

#### 54 55 56 *Study strengths and limitations*

1  
2  
3 Our study's decedent cohort was representative of the source population in all adult acute care hospitals in a large  
4 urban region; using matched control groups from within and prior to the COVID-19 pandemic facilitated valid and  
5 unique comparisons, which generated some robust findings, particularly regarding opioid use. The retrospective  
6 design and use of admission symptom assessment and comorbidity data without similar data, including medication  
7 efficacy and side-effects, from within the more immediate end-of-life period are obvious limitations. The role of  
8 non-pharmacological interventions was not examined. Although rigorous training and accuracy checks were  
9 conducted regarding data abstraction, misclassification bias cannot be excluded, and absence of abstractor  
10 blinding to the study hypothesis is a potential source of bias. This study was performed during Wave 1 of the  
11 pandemic, and both symptom burden and medication requirements for symptom control could have changed to  
12 some extent with subsequent waves. The generalizability of our study findings is largely limited to end-of-life care  
13 for hospitalized decedents, whereas many of the COVID-19 pandemic related deaths in Wave 1 of the pandemic  
14 occurred in nursing homes.

## 30 CONCLUSIONS

31 Overall, our study evidence suggests that in addition to the association of male sex with higher end-of-life opioid  
32 requirements, patients dying of COVID-19 infection required higher daily opioid and lorazepam doses than those  
33 dying of other causes both before and during the COVID-19 pandemic. Furthermore, patients who died of COVID-  
34 19 infection in ICU required higher maximum 24-hour propofol doses than those who died in ICU without COVID-  
35 19 infection. Increased breathlessness and agitation due to COVID-19 and higher underlying comorbidity levels  
36 may require higher doses of opioids and sedatives for symptom control. These findings warrant consideration in  
37 the context of managing ongoing life threatening COVID-19 infection and in anticipatory preparation for future  
38 respiratory virus pandemics.

**Data availability statement**

No additional data available

**Acknowledgements**

The authors are grateful to Dong Vo, Ottawa Methods Centre's Data Management Services and Ottawa Hospital Research Institute for the creation of an electronic study database. We gratefully acknowledge the input of representatives from Bereaved Families of Ontario, Canadian Virtual Hospice and the Champlain Hospice Palliative Care Program. PGL, LC, VG, RM, GW, AB, PE, SHB, PT, and JD receive Academic Protected Time Awards from the Department of Medicine, University of Ottawa, Ottawa, Canada.

**Contributors**

JD conceptualized the project and designed the study with assistance from PL, HP, LC, VG, RM, GW, AB, KW, JL, CW, DB, PE, ID, KB, CD, AI, SHB, SI, PT, BV. The study site leads, HP, VG, LC, co-ordinated ethics applications along with PL, JL and DB. Data were abstracted by PL, HP, SRA, EB, LC, RM, GW, AB, KAM, KW, PE, ID, KB and CD. Data verification was coordinated by PL with the assistance of HP, SRA, EB, LC, RM, GW, AB, PE and KB. Statistical analyses were performed by PL with support from LC and CW. All authors, including MK, CN, BH and KA assisted with data interpretation. The original version of the manuscript was drafted by PL and LC and critically reviewed by all authors. All authors approved the final manuscript as submitted.

**Funding**

This work has been funded in part by a grant from the University of Ottawa Faculty of Medicine COVID-19 Pandemic Response Funding Program, and in part by a contribution from Health Canada, Health Care Policy and Strategies Program. The views expressed herein do not necessarily represent the views of Health Canada nor the University of Ottawa.

**Competing interests**

The authors declare no potential conflicts of interest with respect to the research, authorship, and/or publication of this article.

## REFERENCES

1. World Health Organisation. 2023 [Available from: <https://www.who.int/publications/m/item/weekly-epidemiological-update-on-covid-19---25-january-2023> accessed January 29 2023].
2. COVID-19 Excess Mortality Collaborators. Estimating excess mortality due to the COVID-19 pandemic: a systematic analysis of COVID-19-related mortality, 2020-21. *Lancet (London, England)* 2022;399(10334):1513-36. doi: 10.1016/s0140-6736(21)02796-3 [published Online First: 2022/03/14]
3. Duffy T, Seaton RA, McKeown A, et al. Hospital Specialist Palliative Care Team Influence on End-of-Life Care in Coronavirus Disease 2019? A Retrospective Observational Cohort Study. *Palliat Med Rep* 2022;3(1):235-43. doi: 10.1089/pmr.2022.0041 [published Online First: 2022/11/08]
4. Wentlandt K, Wolofsky KT, Weiss A, et al. Identifying barriers and facilitators to palliative care integration in the management of hospitalized patients with COVID-19: A qualitative study. *Palliative Medicine* 2022;36(6):945-54. doi: 10.1177/02692163221087162 [published Online First: 2022/04/21]
5. Arya A, Buchman S, Gagnon B, et al. Pandemic palliative care: beyond ventilators and saving lives. *CMAJ : Canadian Medical Association Journal* 2020;192(15):E400-e04. doi: 10.1503/cmaj.200465 [published Online First: 2020/04/03]
6. Mottiar M, Hendin A, Fischer L, et al. End-of-life care in patients with a highly transmissible respiratory virus: implications for COVID-19. *Canadian Journal of Anaesthesia* 2020;67(10):1417-23. doi: 10.1007/s12630-020-01699-0 [published Online First: 2020/05/13]
7. Ting R, Edmonds P, Higginson IJ, et al. Palliative care for patients with severe covid-19. *BMJ (Clinical research ed)* 2020;370:m2710. doi: 10.1136/bmj.m2710 [published Online First: 2020/07/16]
8. Muhsen K, Maimon N, Mizrahi AY, et al. Association of BNT162b2 Vaccine Third Dose Receipt With Incidence of SARS-CoV-2 Infection, COVID-19-Related Hospitalization, and Death Among Residents of Long-term Care Facilities, August to October 2021. *JAMA Netw Open* 2022;5(7):e2219940. doi: 10.1001/jamanetworkopen.2022.19940 [published Online First: 2022/07/08]
9. Agrawal U, Bedston S, McCowan C, et al. Severe COVID-19 outcomes after full vaccination of primary schedule and initial boosters: pooled analysis of national prospective cohort studies of 30 million individuals in

- 1  
2  
3 England, Northern Ireland, Scotland, and Wales. *Lancet (London, England)* 2022;400(10360):1305-20. doi:  
4 10.1016/s0140-6736(22)01656-7 [published Online First: 2022/10/17]  
5  
6  
7 10. Hippisley-Cox J, Coupland CA, Mehta N, et al. Risk prediction of covid-19 related death and hospital admission  
8 in adults after covid-19 vaccination: national prospective cohort study. *BMJ (Clinical research ed)*  
9 2021;374:n2244. doi: 10.1136/bmj.n2244 [published Online First: 2021/09/19]  
10  
11  
12  
13 11. Docherty AB, Harrison EM, Green CA, et al. Features of 20 133 UK patients in hospital with covid-19 using the  
14 ISARIC WHO Clinical Characterisation Protocol: prospective observational cohort study. *BMJ (Clinical*  
15 *research ed)* 2020;369:m1985. doi: 10.1136/bmj.m1985 [published Online First: 2020/05/24]  
16  
17  
18  
19 12. Murthy S, Archambault PM, Atique A, et al. Characteristics and outcomes of patients with COVID-19 admitted  
20 to hospital and intensive care in the first phase of the pandemic in Canada: a national cohort study. *CMAJ*  
21 *Open* 2021;9(1):E181-e88. doi: 10.9778/cmajo.20200250 [published Online First: 2021/03/11]  
22  
23  
24  
25 13. Petrilli CM, Jones SA, Yang J, et al. Factors associated with hospital admission and critical illness among 5279  
26 people with coronavirus disease 2019 in New York City: prospective cohort study. *BMJ (Clinical research*  
27 *ed)* 2020;369:m1966. doi: 10.1136/bmj.m1966 [published Online First: 2020/05/24]  
28  
29  
30  
31 14. Hetherington L, Johnston B, Kotronoulas G, et al. COVID-19 and Hospital Palliative Care - A service evaluation  
32 exploring the symptoms and outcomes of 186 patients and the impact of the pandemic on specialist  
33 Hospital Palliative Care. *Palliative Medicine* 2020;34(9):1256-62. doi: 10.1177/0269216320949786  
34  
35  
36  
37 [published Online First: 2020/08/15]  
38  
39  
40 15. Keeley P, Buchanan D, Carolan C, et al. Symptom burden and clinical profile of COVID-19 deaths: a rapid  
41 systematic review and evidence summary. *BMJ Supportive & Palliative Care* 2020;10(4):381-84. doi:  
42 10.1136/bmjspcare-2020-002368 [published Online First: 2020/05/30]  
43  
44  
45  
46 16. Martinsson L, Bergström J, Hedman C, et al. Symptoms, symptom relief and support in COVID-19 patients dying  
47 in hospitals during the first pandemic wave. *BMC Palliative Care* 2021;20(1):102. doi: 10.1186/s12904-  
48 021-00785-4 [published Online First: 2021/07/03]  
49  
50  
51  
52 17. Huang C, Wang Y, Li X, et al. Clinical features of patients infected with 2019 novel coronavirus in Wuhan, China.  
53 *Lancet (London, England)* 2020;395(10223):497-506. doi: 10.1016/s0140-6736(20)30183-5 [published  
54 Online First: 2020/01/28]  
55  
56  
57  
58  
59  
60

- 1  
2  
3 18. Garcez FB, Aliberti MJR, Poco PCE, et al. Delirium and Adverse Outcomes in Hospitalized Patients with COVID-  
4  
5 19. *Journal of the American Geriatrics Society* 2020;68(11):2440-46. doi: 10.1111/jgs.16803 [published  
6  
7 Online First: 2020/08/25]  
8  
9 19. Etkind SN, Bone AE, Lovell N, et al. The Role and Response of Palliative Care and Hospice Services in Epidemics  
10  
11 and Pandemics: A Rapid Review to Inform Practice During the COVID-19 Pandemic. *Journal of Pain and*  
12  
13 *Symptom Management* 2020;60(1):e31-e40. doi: 10.1016/j.jpainsymman.2020.03.029 [published Online  
14  
15 First: 2020/04/12]  
16  
17 20. Oluyase AO, Bajwah S, Sleeman KE, et al. Symptom management in people dying with COVID-19: multinational  
18  
19 observational study. *BMJ Supportive & Palliative Care* 2022;12(4):439-47. doi: 10.1136/spcare-2022-  
20  
21 003799 [published Online First: 2022/11/24]  
22  
23 21. Bowman BA, Back AL, Esch AE, et al. Crisis Symptom Management and Patient Communication Protocols Are  
24  
25 Important Tools for All Clinicians Responding to COVID-19. *Journal of Pain and Symptom Management*  
26  
27 2020;60(2):e98-e100. doi: 10.1016/j.jpainsymman.2020.03.028 [published Online First: 2020/04/11]  
28  
29 22. deLima Thomas J, Leiter RE, Abrahm JL, et al. Development of a Palliative Care Toolkit for the COVID-19  
30  
31 Pandemic. *Journal of Pain and Symptom Management* 2020;60(2):e22-e25. doi:  
32  
33 10.1016/j.jpainsymman.2020.05.021 [published Online First: 2020/05/27]  
34  
35 23. Cheyne S, Lindley RI, Smallwood N, et al. Care of older people and people requiring palliative care with COVID-  
36  
37 19: guidance from the Australian National COVID-19 Clinical Evidence Taskforce. *The Medical journal of*  
38  
39 *Australia* 2022;216(4):203-08. doi: 10.5694/mja2.51353 [published Online First: 2021/12/06]  
40  
41 24. National Institute for Health and Care Excellence (NICE). Managing COVID-19 symptoms (including at the end of  
42  
43 life) in the community: summary of NICE guidelines. *BMJ (Clinical research ed)* 2020;369:m1461. doi:  
44  
45 10.1136/bmj.m1461 [published Online First: 2020/04/22]  
46  
47 25. Luz M, Brandão Barreto B, de Castro REV, et al. Practices in sedation, analgesia, mobilization, delirium, and  
48  
49 sleep deprivation in adult intensive care units (SAMDS-ICU): an international survey before and during the  
50  
51 COVID-19 pandemic. *Ann Intensive Care* 2022;12(1):9. doi: 10.1186/s13613-022-00985-y [published  
52  
53 Online First: 2022/02/06]  
54  
55  
56  
57  
58  
59  
60



- 1  
2  
3 26. Sim J, Goh WY, Wiryasaputra L, et al. Use of Phenobarbitone for Palliative Sedation in Dyspneic Crises Due to  
4 COVID-19 Pneumonia - A Case Series. *Journal of Pain & Palliative Care Pharmacotherapy* 2022;36(4):242-  
5 48. doi: 10.1080/15360288.2022.2113596 [published Online First: 2022/08/26]  
6  
7  
8  
9 27. Andreas M, Piechotta V, Skoetz N, et al. Interventions for palliative symptom control in COVID-19 patients. *The*  
10 *Cochrane Database of Systematic Reviews* 2021;8(8):Cd015061. doi: 10.1002/14651858.Cd015061  
11 [published Online First: 2021/08/24]  
12  
13  
14  
15 28. Heath L, Carey M, Lowney AC, et al. Pharmacological strategies used to manage symptoms of patients dying of  
16 COVID-19: A rapid systematic review. *Palliative Medicine* 2021;35(6):1099-107. doi:  
17 10.1177/02692163211013255 [published Online First: 2021/05/14]  
18  
19  
20  
21 29. Barnes H, McDonald J, Smallwood N, et al. Opioids for the palliation of refractory breathlessness in adults with  
22 advanced disease and terminal illness. *The Cochrane Database of Systematic Reviews* 2016;3:Cd011008.  
23 doi: 10.1002/14651858.CD011008.pub2 [published Online First: 2016/04/01]  
24  
25  
26  
27 30. Jackson T, Hobson K, Clare H, et al. End-of-life care in COVID-19: An audit of pharmacological management in  
28 hospital inpatients. *Palliative Medicine* 2020;34(9):1235-40. doi: 10.1177/0269216320935361 [published  
29 Online First: 2020/06/27]  
30  
31  
32  
33 31. Wong AK, Philip J, Wawryk O, et al. A Multi-Centre COVID-19 Study Examining Symptoms and Medication Use  
34 in the Final Week of Life. *Journal of Pain and Symptom Management* 2022;64(3):e139-e47. doi:  
35 10.1016/j.jpainsymman.2022.05.013 [published Online First: 2022/06/02]  
36  
37  
38  
39 32. Janssens WH, Van Den Noortgate NJ, Piers RD. Terminal care in oldest old dying from COVID-19 in the acute  
40 hospital : A multicenter study describing pharmacological treatment in the last 24 h. *Zeitschrift fur*  
41 *Gerontologie und Geriatrie* 2022;55(2):129-34. doi: 10.1007/s00391-022-02036-4 [published Online First:  
42 2022/03/05]  
43  
44  
45  
46  
47 33. Sun H, Lee J, Meyer BJ, et al. Characteristics and Palliative Care Needs of COVID-19 Patients Receiving Comfort-  
48 Directed Care. *Journal of the American Geriatrics Society* 2020;68(6):1162-64. doi: 10.1111/jgs.16507  
49 [published Online First: 2020/04/25]  
50  
51  
52  
53  
54  
55  
56  
57  
58  
59  
60

- 1  
2  
3 34. Downar J, Parsons HA, Cohen L, et al. Bereavement outcomes in family members of those who died in acute  
4 care hospitals before and during the first wave of COVID-19: A cohort study. *Palliative Medicine*  
5 2022;36(8):1305-12. doi: 10.1177/02692163221109711 [published Online First: 2022/07/06]  
6  
7  
8  
9 35. Lawlor P, Parsons H, Adeli SR, et al. Comparative end-of-life communication and support in hospitalised  
10 decedents before and during the COVID-19 pandemic: a retrospective regional cohort study in Ottawa,  
11 Canada. *BMJ Open* 2022;12(6):e062937. doi: 10.1136/bmjopen-2022-062937 [published Online First:  
12 2022/06/28]  
13  
14  
15  
16  
17 36. von Elm E, Altman DG, Egger M, et al. The Strengthening the Reporting of Observational Studies in  
18 Epidemiology (STROBE) statement: guidelines for reporting observational studies. *PLoS Medicine*  
19 2007;4(10):e296. doi: 10.1371/journal.pmed.0040296 [published Online First: 2007/10/19]  
20  
21  
22  
23 37. Pereira J, Lawlor P, Vigano A, et al. Equianalgesic dose ratios for opioids. a critical review and proposals for  
24 long-term dosing. *Journal of Pain and Symptom Management* 2001;22(2):672-87. [published Online First:  
25 2001/08/10]  
26  
27  
28  
29 38. Alderman B, Webber K, Davies A. An audit of end-of-life symptom control in patients with corona virus disease  
30 2019 (COVID-19) dying in a hospital in the United Kingdom. *Palliative Medicine* 2020;34(9):1249-55. doi:  
31 10.1177/0269216320947312 [published Online First: 2020/08/02]  
32  
33  
34  
35 39. Chidiac C, Feuer D, Flatley M, et al. The need for early referral to palliative care especially for Black, Asian and  
36 minority ethnic groups in a COVID-19 pandemic: Findings from a service evaluation. *Palliative Medicine*  
37 2020;34(9):1241-48. doi: 10.1177/0269216320946688 [published Online First: 2020/08/02]  
38  
39  
40  
41 40. Lovell N, Maddocks M, Etkind SN, et al. Characteristics, Symptom Management, and Outcomes of 101 Patients  
42 With COVID-19 Referred for Hospital Palliative Care. *Journal of Pain and Symptom Management*  
43 2020;60(1):e77-e81. doi: 10.1016/j.jpainsymman.2020.04.015 [published Online First: 2020/04/24]  
44  
45  
46  
47 41. Inouye SK, Westendorp RG, Saczynski JS. Delirium in elderly people. *Lancet (London, England)*  
48 2014;383(9920):911-22. doi: 10.1016/s0140-6736(13)60688-1 [published Online First: 2013/09/03]  
49  
50  
51  
52 42. Zuin M, Rigatelli G, Bilato C, et al. Pre-existing atrial fibrillation is associated with increased mortality in COVID-  
53 19 Patients. *J Interv Card Electrophysiol* 2021;62(2):231-38. doi: 10.1007/s10840-021-00992-2 [published  
54 Online First: 2021/04/16]  
55  
56  
57  
58  
59  
60

- 1  
2  
3 43. Hall S, Gallagher RM, Gracely E, et al. The terminal cancer patient: effects of age, gender, and primary tumor  
4 site on opioid dose. *Pain Medicine (Malden, Mass)* 2003;4(2):125-34. doi: 10.1046/j.1526-  
5 4637.2003.03020.x [published Online First: 2003/07/23]  
6  
7  
8  
9 44. Yennurajalingam S, Lu Z, Reddy SK, et al. Patterns of Opioid Prescription, Use, and Costs Among Patients With  
10 Advanced Cancer and Inpatient Palliative Care Between 2008 and 2014. *Journal of Oncology Practice*  
11 2019;15(1):e74-e83. doi: 10.1200/jop.18.00205 [published Online First: 2018/11/30]  
12  
13  
14  
15 45. Dessie ZG, Zewotir T. Mortality-related risk factors of COVID-19: a systematic review and meta-analysis of 42  
16 studies and 423,117 patients. *BMC Infectious Diseases* 2021;21(1):855. doi: 10.1186/s12879-021-06536-3  
17  
18 [published Online First: 2021/08/23]  
19  
20  
21 46. Bush SH, Grassau PA, Yarmo MN, et al. The Richmond Agitation-Sedation Scale modified for palliative care  
22 inpatients (RASS-PAL): a pilot study exploring validity and feasibility in clinical practice. *BMC Palliative*  
23 *Care* 2014;13(1):17. doi: 10.1186/1472-684x-13-17 [published Online First: 2014/04/02]  
24  
25  
26  
27  
28  
29  
30  
31  
32  
33  
34  
35  
36  
37  
38  
39  
40  
41  
42  
43  
44  
45  
46  
47  
48  
49  
50  
51  
52  
53  
54  
55  
56  
57  
58  
59  
60

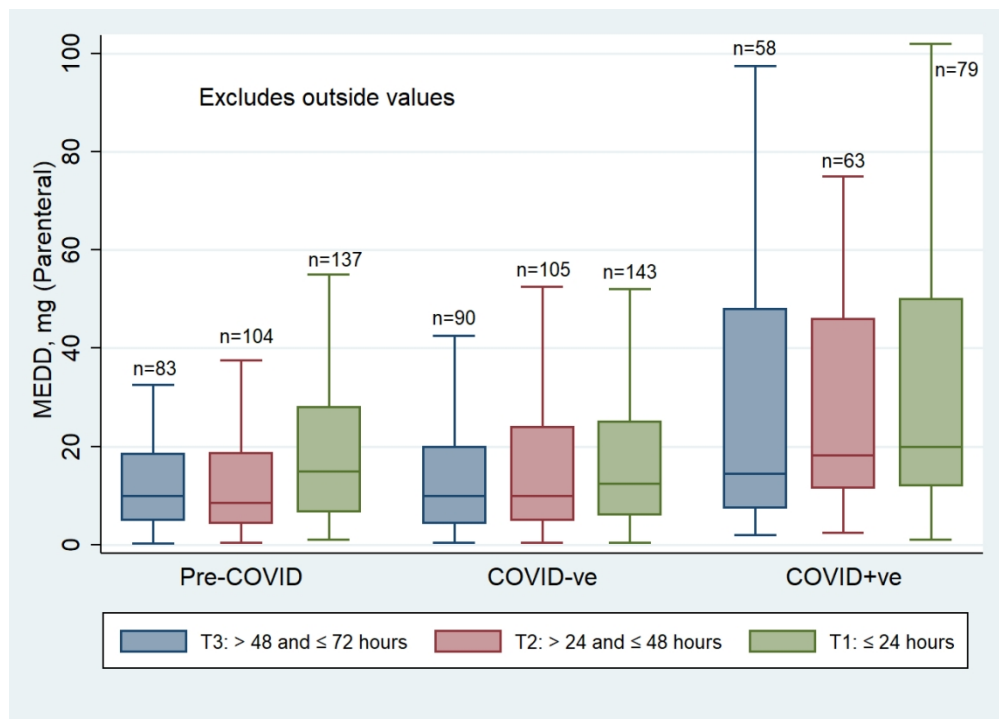

Figure 1 Median MEDD for consecutive 24-hour periods (T3-T1) within the last 72 hours of life

461x329mm (72 x 72 DPI)

1  
2  
3  
4  
5  
6  
7  
8  
9  
10  
11  
12  
13  
14  
15  
16  
17  
18  
19  
20  
21  
22  
23  
24  
25  
26  
27  
28  
29  
30  
31  
32  
33  
34  
35  
36  
37  
38  
39  
40  
41  
42  
43  
44  
45  
46  
47  
48  
49  
50  
51  
52  
53  
54  
55  
56  
57  
58  
59  
60

**Appendix 1 Clinical characteristics as documented at admission, and supportive interventions as documented during admission**

|                                    |
|------------------------------------|
| <b>Comorbidities at admission</b>  |
| COPD                               |
| Asthma                             |
| Heart Failure                      |
| Hypertension                       |
| Atrial fibrillation                |
| Coronary artery disease            |
| Chronic liver disease              |
| Diabetes mellitus                  |
| Chronic kidney disease             |
| Obesity                            |
| HIV infection                      |
| Dementia                           |
| Active cancer                      |
| Other comorbidity                  |
|                                    |
| <b>Symptoms/signs at admission</b> |

For peer review only

|                                                              |
|--------------------------------------------------------------|
| Breathlessness                                               |
| Airway secretions                                            |
| Cough                                                        |
| Agitation                                                    |
| Drowsiness                                                   |
| Pain                                                         |
| Cognitive impairment                                         |
| Fatigue                                                      |
| Fever                                                        |
| Other symptoms                                               |
|                                                              |
| <b>Respiratory/circulatory support used during admission</b> |
| BIPAP                                                        |
| High flow nasal cannula                                      |
| Intubated                                                    |
| Other respiratory support                                    |
| Vasopressor use                                              |

1  
2  
3  
4  
5  
6  
7  
8  
9  
10  
11  
12  
13  
14  
15  
16  
17  
18  
19  
20  
21  
22  
23  
24  
25  
26  
27  
28  
29  
30  
31  
32  
33  
34  
35  
36  
37  
38  
39  
40  
41  
42  
43  
44  
45  
46  
47  
48  
49  
50  
51  
52  
53  
54  
55  
56  
57  
58  
59  
60

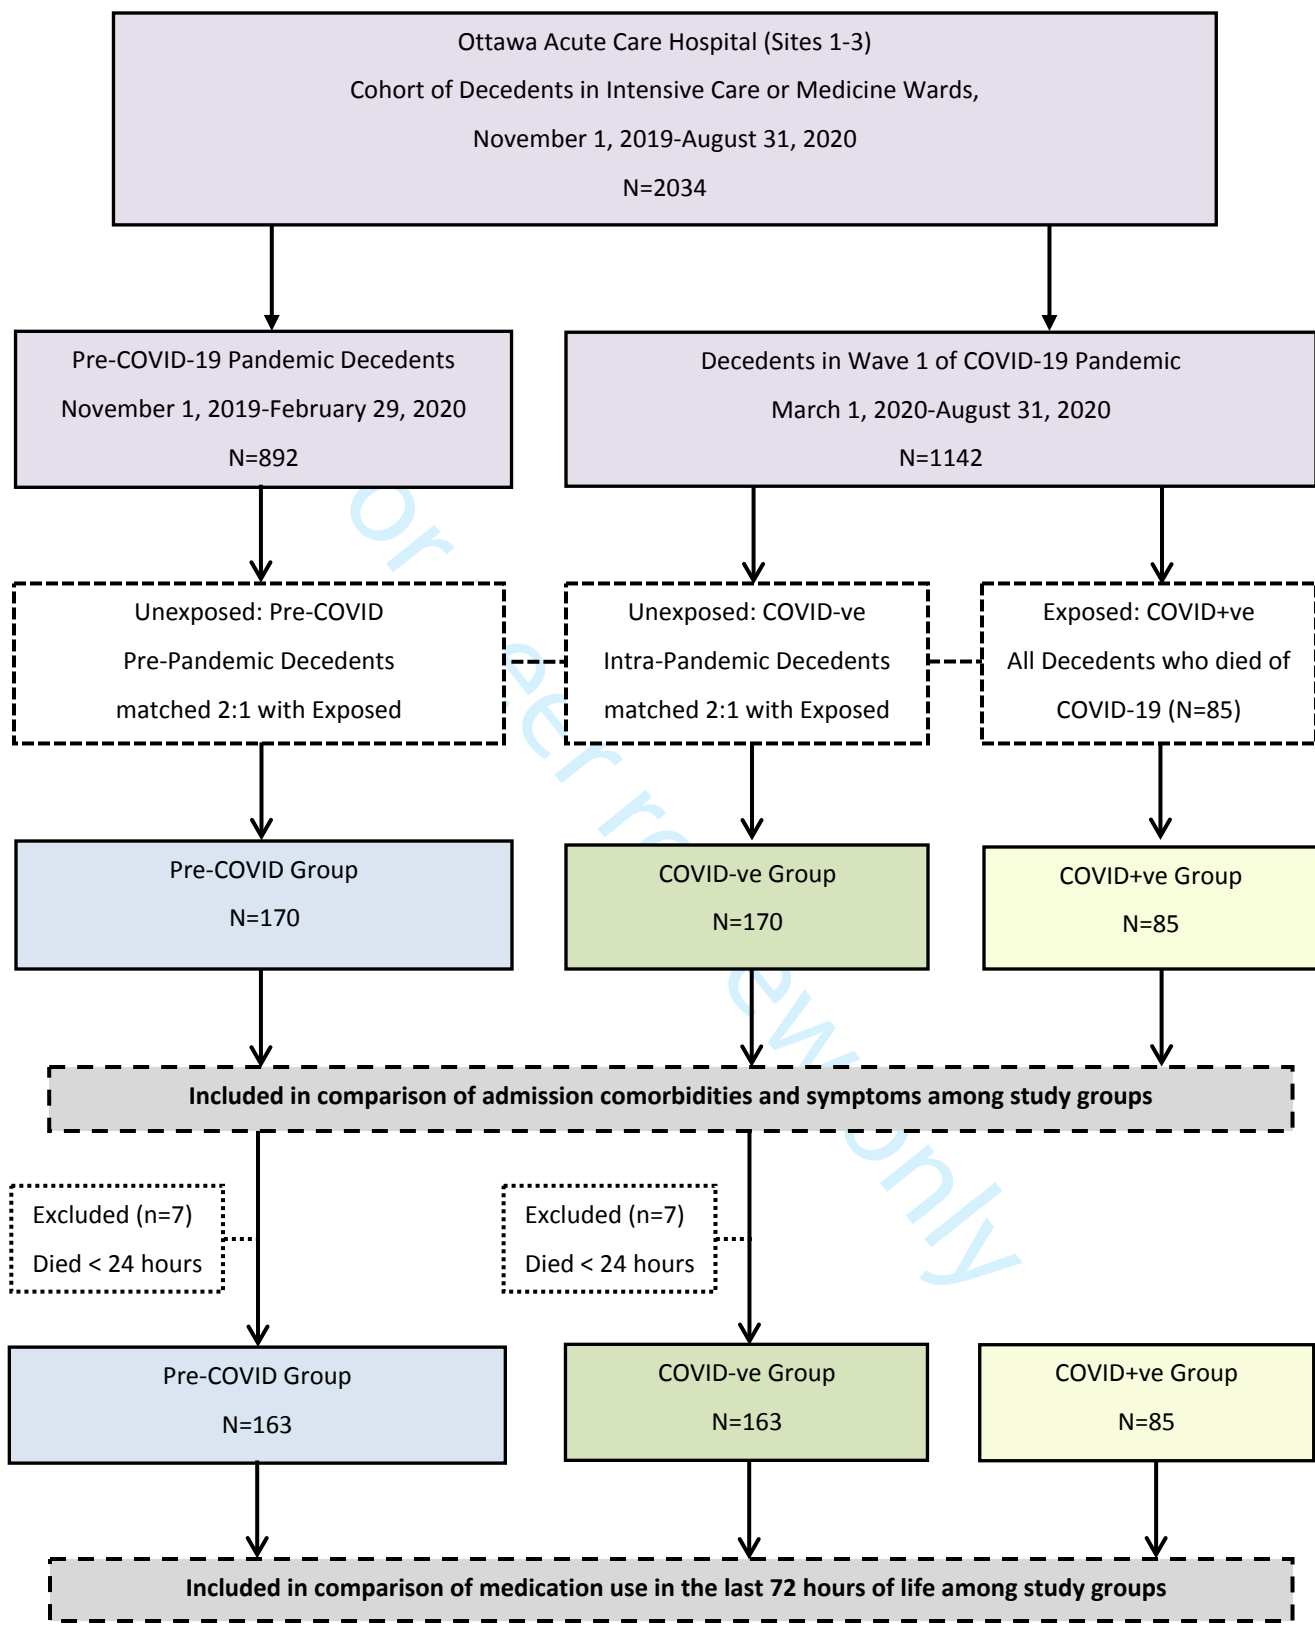

**Appendix 3 Supplemental Table Study group comparison of admission clinical characteristics and respiratory/circulatory support use during admission**

| Clinical characteristics           | Time periods and designated study groups |                              |                            | P values         |
|------------------------------------|------------------------------------------|------------------------------|----------------------------|------------------|
|                                    | Nov 2019-Feb 2020                        | Mar 2020 – Aug 2020 (Wave 1) |                            |                  |
|                                    | Pre-COVID Group<br>N=170 (%)             | COVID-ve Group<br>N=170 (%)  | COVID+ve Group<br>N=85 (%) |                  |
| <b>Comorbidities at admission</b>  |                                          |                              |                            |                  |
| <b>COPD</b>                        | 43 (25.3)                                | 49 (28.8)                    | 17 (20.0)                  | 0.312            |
| <b>Asthma</b>                      | 7 (4.1)                                  | 9 (5.3)                      | 3 (3.5)                    | 0.780            |
| <b>Heart Failure</b>               | 40 (23.5)                                | 48 (28.2)                    | 16 (18.8)                  | 0.240            |
| <b>Hypertension</b>                | 95 (55.9)                                | 104 (61.2)                   | 57 (67.1)                  | 0.217            |
| <b>Atrial fibrillation</b>         | <b>45 (26.5)</b>                         | <b>55 (32.4)</b>             | <b>13 (15.3)</b>           | <b>0.015</b>     |
| <b>Coronary artery disease</b>     | 52 (30.6)                                | 52 (30.6)                    | 22 (25.9)                  | 0.697            |
| <b>Chronic liver disease</b>       | 3 (1.8)                                  | 11 (6.5)                     | 3 (3.5)                    | 0.084            |
| <b>Diabetes mellitus</b>           | 48 (28.2)                                | 56 (32.9)                    | 26 (30.6)                  | 0.642            |
| <b>Chronic kidney disease</b>      | 32 (18.8)                                | 38 (22.4)                    | 19 (22.4)                  | 0.681            |
| <b>Obesity</b>                     | 6 (3.5)                                  | 15 (8.8)                     | 4 (4.7)                    | 0.102            |
| <b>HIV infection</b>               | 0 (0.0)                                  | 0 (0.0)                      | 1 (1.2)                    | 0.135            |
| <b>Dementia</b>                    | <b>47 (27.7)</b>                         | <b>44 (25.9)</b>             | <b>35 (41.2)</b>           | <b>0.032</b>     |
| <b>Active cancer</b>               | 44 (25.9)                                | 37 (21.8)                    | 11 (12.9)                  | 0.061            |
| <b>Other comorbidity</b>           | <b>108 (63.5)</b>                        | <b>102 (60.0)</b>            | <b>66 (77.7)</b>           | <b>0.018</b>     |
|                                    |                                          |                              |                            |                  |
| <b>Symptoms/signs at admission</b> |                                          |                              |                            |                  |
| <b>Breathlessness</b>              | <b>72 (42.4)</b>                         | <b>80 (47.1)</b>             | <b>54 (63.5)</b>           | <b>0.006</b>     |
| <b>Airway secretions</b>           | 28 (16.5)                                | 16 (9.4)                     | 7 (8.2)                    | 0.066            |
| <b>Cough</b>                       | <b>46 (27.1)</b>                         | <b>33 (19.4)</b>             | <b>34 (40.0)</b>           | <b>0.002</b>     |
| <b>Agitation</b>                   | 11 (6.5)                                 | 14 (8.2)                     | 10 (11.8)                  | 0.350            |
| <b>Drowsiness</b>                  | 68 (40.0)                                | 57 (33.5)                    | 39 (45.9)                  | 0.143            |
| <b>Pain</b>                        | <b>50 (29.4)</b>                         | <b>49 (28.8)</b>             | <b>9 (10.6)</b>            | <b>0.002</b>     |
| <b>Cognitive impairment</b>        | 57 (33.5)                                | 59 (34.7)                    | 35 (41.2)                  | 0.465            |
| <b>Fatigue</b>                     | 88 (51.8)                                | 83 (48.8)                    | 51 (60.0)                  | 0.239            |
| <b>Fever</b>                       | <b>16 (9.4)</b>                          | <b>23 (13.5)</b>             | <b>46 (54.1)</b>           | <b>&lt;0.001</b> |
| <b>Other symptoms</b>              | 90 (52.9)                                | 79 (46.5)                    | 42 (49.4)                  | 0.490            |



|                                                              |                  |                  |                  |                  |
|--------------------------------------------------------------|------------------|------------------|------------------|------------------|
|                                                              |                  |                  |                  |                  |
| <b>Respiratory/circulatory support used during admission</b> |                  |                  |                  |                  |
| <b>BIPAP</b>                                                 | 22 (12.9)        | 17 (10.0)        | 4 (4.7)          | 0.121            |
| <b>High flow nasal cannula</b>                               | <b>63 (37.1)</b> | <b>49 (28.8)</b> | <b>46 (54.1)</b> | <b>&lt;0.001</b> |
| <b>Intubated</b>                                             | 45 (26.5)        | 43 (25.3)        | 14 (16.5)        | 0.186            |
| <b>Other respiratory support</b>                             | 50 (29.4)        | 52 (30.6)        | 31 (36.5)        | 0.502            |
| <b>Vasopressor use</b>                                       | 43 (25.3)        | 47 (27.7)        | 13 (15.3)        | 0.087            |

**STROBE 2007 (v4) Statement—Checklist of items that should be included in reports of *cohort studies***

| Section/Topic                | Item # | Recommendation                                                                                                                                                                       | Reported on page # |
|------------------------------|--------|--------------------------------------------------------------------------------------------------------------------------------------------------------------------------------------|--------------------|
| <b>Title and abstract</b>    | 1      | (a) Indicate the study's design with a commonly used term in the title or the abstract                                                                                               | 6                  |
|                              |        | (b) Provide in the abstract an informative and balanced summary of what was done and what was found                                                                                  | 6                  |
| <b>Introduction</b>          |        |                                                                                                                                                                                      |                    |
| Background/rationale         | 2      | Explain the scientific background and rationale for the investigation being reported                                                                                                 | 8                  |
| Objectives                   | 3      | State specific objectives, including any prespecified hypotheses                                                                                                                     | 9                  |
| <b>Methods</b>               |        |                                                                                                                                                                                      |                    |
| Study design                 | 4      | Present key elements of study design early in the paper                                                                                                                              | 9                  |
| Setting                      | 5      | Describe the setting, locations, and relevant dates, including periods of recruitment, exposure, follow-up, and data collection                                                      | 9-10               |
| Participants                 | 6      | (a) Give the eligibility criteria, and the sources and methods of selection of participants. Describe methods of follow-up                                                           | 10                 |
|                              |        | (b) For matched studies, give matching criteria and number of exposed and unexposed                                                                                                  | 10                 |
| Variables                    | 7      | Clearly define all outcomes, exposures, predictors, potential confounders, and effect modifiers. Give diagnostic criteria, if applicable                                             | 9-10               |
| Data sources/<br>measurement | 8*     | For each variable of interest, give sources of data and details of methods of assessment (measurement). Describe comparability of assessment methods if there is more than one group | 10-11              |
| Bias                         | 9      | Describe any efforts to address potential sources of bias                                                                                                                            | 11                 |
| Study size                   | 10     | Explain how the study size was arrived at                                                                                                                                            | 11                 |
| Quantitative variables       | 11     | Explain how quantitative variables were handled in the analyses. If applicable, describe which groupings were chosen and why                                                         | 12                 |
| Statistical methods          | 12     | (a) Describe all statistical methods, including those used to control for confounding                                                                                                | 12                 |
|                              |        | (b) Describe any methods used to examine subgroups and interactions                                                                                                                  | 12                 |
|                              |        | (c) Explain how missing data were addressed                                                                                                                                          | 12                 |
|                              |        | (d) If applicable, explain how loss to follow-up was addressed                                                                                                                       |                    |
|                              |        | (e) Describe any sensitivity analyses                                                                                                                                                |                    |
| <b>Results</b>               |        |                                                                                                                                                                                      |                    |

|                          |     |                                                                                                                                                                                                              |                     |
|--------------------------|-----|--------------------------------------------------------------------------------------------------------------------------------------------------------------------------------------------------------------|---------------------|
| Participants             | 13* | (a) Report numbers of individuals at each stage of study—eg numbers potentially eligible, examined for eligibility, confirmed eligible, included in the study, completing follow-up, and analysed            | 12                  |
|                          |     | (b) Give reasons for non-participation at each stage                                                                                                                                                         | 12                  |
|                          |     | (c) Consider use of a flow diagram                                                                                                                                                                           | Supplemental Figure |
| Descriptive data         | 14* | (a) Give characteristics of study participants (eg demographic, clinical, social) and information on exposures and potential confounders                                                                     | 12-13               |
|                          |     | (b) Indicate number of participants with missing data for each variable of interest                                                                                                                          | 12                  |
|                          |     | (c) Summarise follow-up time (eg, average and total amount)                                                                                                                                                  | 12                  |
| Outcome data             | 15* | Report numbers of outcome events or summary measures over time                                                                                                                                               | 12-20               |
| Main results             | 16  | (a) Give unadjusted estimates and, if applicable, confounder-adjusted estimates and their precision (eg, 95% confidence interval). Make clear which confounders were adjusted for and why they were included | 18-19               |
|                          |     | (b) Report category boundaries when continuous variables were categorized                                                                                                                                    | N/A                 |
|                          |     | (c) If relevant, consider translating estimates of relative risk into absolute risk for a meaningful time period                                                                                             | N/A                 |
| Other analyses           | 17  | Report other analyses done—eg analyses of subgroups and interactions, and sensitivity analyses                                                                                                               | 14-15               |
| <b>Discussion</b>        |     |                                                                                                                                                                                                              |                     |
| Key results              | 18  | Summarise key results with reference to study objectives                                                                                                                                                     | 21                  |
| <b>Limitations</b>       |     |                                                                                                                                                                                                              |                     |
| Interpretation           | 20  | Give a cautious overall interpretation of results considering objectives, limitations, multiplicity of analyses, results from similar studies, and other relevant evidence                                   | 21-23               |
| Generalisability         | 21  | Discuss the generalisability (external validity) of the study results                                                                                                                                        | 21-24               |
| <b>Other information</b> |     |                                                                                                                                                                                                              |                     |
| Funding                  | 22  | Give the source of funding and the role of the funders for the present study and, if applicable, for the original study on which the present article is based                                                | 25                  |

\*Give information separately for cases and controls in case-control studies and, if applicable, for exposed and unexposed groups in cohort and cross-sectional studies.

**Note:** An Explanation and Elaboration article discusses each checklist item and gives methodological background and published examples of transparent reporting. The STROBE checklist is best used in conjunction with this article (freely available on the Web sites of PLoS Medicine at <http://www.plosmedicine.org/>, Annals of Internal Medicine at <http://www.annals.org/>, and Epidemiology at <http://www.epidem.com/>). Information on the STROBE Initiative is available at [www.strobe-statement.org](http://www.strobe-statement.org).

# BMJ Open

## Comorbidities, symptoms, and end-of-life medication use in hospitalized decedents before and during the COVID-19 pandemic: a retrospective regional cohort study in Ottawa, Canada

|                               |                                                                                                                                                                                                                                                                                                                                                                                                                                                                                                                                                                                                                                                                                                                                                                                                                                                                                                                                                                                                                                                                                                                                                                                                                                                                                                                                                                                                                                                                                                                                                                                                                                                                                                                                                                                                                                                                                                                                                               |
|-------------------------------|---------------------------------------------------------------------------------------------------------------------------------------------------------------------------------------------------------------------------------------------------------------------------------------------------------------------------------------------------------------------------------------------------------------------------------------------------------------------------------------------------------------------------------------------------------------------------------------------------------------------------------------------------------------------------------------------------------------------------------------------------------------------------------------------------------------------------------------------------------------------------------------------------------------------------------------------------------------------------------------------------------------------------------------------------------------------------------------------------------------------------------------------------------------------------------------------------------------------------------------------------------------------------------------------------------------------------------------------------------------------------------------------------------------------------------------------------------------------------------------------------------------------------------------------------------------------------------------------------------------------------------------------------------------------------------------------------------------------------------------------------------------------------------------------------------------------------------------------------------------------------------------------------------------------------------------------------------------|
| Journal:                      | <i>BMJ Open</i>                                                                                                                                                                                                                                                                                                                                                                                                                                                                                                                                                                                                                                                                                                                                                                                                                                                                                                                                                                                                                                                                                                                                                                                                                                                                                                                                                                                                                                                                                                                                                                                                                                                                                                                                                                                                                                                                                                                                               |
| Manuscript ID                 | bmjopen-2023-075518.R1                                                                                                                                                                                                                                                                                                                                                                                                                                                                                                                                                                                                                                                                                                                                                                                                                                                                                                                                                                                                                                                                                                                                                                                                                                                                                                                                                                                                                                                                                                                                                                                                                                                                                                                                                                                                                                                                                                                                        |
| Article Type:                 | Original research                                                                                                                                                                                                                                                                                                                                                                                                                                                                                                                                                                                                                                                                                                                                                                                                                                                                                                                                                                                                                                                                                                                                                                                                                                                                                                                                                                                                                                                                                                                                                                                                                                                                                                                                                                                                                                                                                                                                             |
| Date Submitted by the Author: | 31-Jul-2023                                                                                                                                                                                                                                                                                                                                                                                                                                                                                                                                                                                                                                                                                                                                                                                                                                                                                                                                                                                                                                                                                                                                                                                                                                                                                                                                                                                                                                                                                                                                                                                                                                                                                                                                                                                                                                                                                                                                                   |
| Complete List of Authors:     | <p>Lawlor, Peter; University of Ottawa, Medicine<br/> Cohen, Leila; University of Ottawa, Medicine<br/> Adeli, Samantha ; University of Ottawa<br/> Besserer, Ella; University of Toronto<br/> Gratton, Valérie; University of Ottawa, Medicine; Institut du Savoir Montfort<br/> Murphy, Rebekah; University of Ottawa, Medicine<br/> Warmels, Grace; University of Ottawa, Medicine<br/> Bruni, Adrianna; University of Ottawa, Medicine<br/> Kabir, Monisha; Bruyere Research Institute, Palliative Care<br/> Noel, Chelsea; University of Ottawa, Psychology<br/> Heidinger, Brandon; Bruyère Research Institute<br/> Anderson, Koby; Bruyere Research Institute, Palliative Care<br/> Arsenault-Mehta, Kyle; University of Ottawa, Psychiatry<br/> Wooller, Krista; Ottawa Hospital, Medicine<br/> Lapenskie, Julie; Bruyère Research Institute; Ottawa Hospital Research Institute<br/> Webber, Colleen; Ottawa Hospital Research Institute, ; Bruyere Research Institute<br/> Bedard, Daniel; Institut du Savoir Montfort<br/> Enright, Paula ; Department of Medicine in Ottawa, Division of Palliative Care<br/> Desjardins, Isabelle; Ottawa Hospital General Campus, Medicine<br/> Bhimji, Khadija; University of Ottawa, Medicine; Queensway Carleton Hospital, Medicine<br/> Dyason, Claire; University of Ottawa, Medicine<br/> Iyengar , Akshai ; University of Ottawa, Medicine<br/> Bush, Shirley H.; University of Ottawa, Division of Palliative Care, Department of Medicine; Bruyere Research Institute, Palliative Care<br/> Isenberg, Sarina; Bruyère Research Institute,<br/> Tanuseputro, Peter; Ottawa Hospital Research Institute; Bruyère Research Institute<br/> Vanderspank-Wright, Brandi; University of Ottawa Faculty of Health Sciences, School of Nursing; Ottawa Hospital Research Institute,<br/> Downar, James; University of Ottawa, Medicine<br/> Parsons, Henrique; University of Ottawa, Department of Medicine</p> |
| <b>Primary Subject            | Palliative care                                                                                                                                                                                                                                                                                                                                                                                                                                                                                                                                                                                                                                                                                                                                                                                                                                                                                                                                                                                                                                                                                                                                                                                                                                                                                                                                                                                                                                                                                                                                                                                                                                                                                                                                                                                                                                                                                                                                               |

1  
2  
3  
4  
5  
6  
7  
8  
9  
10  
11  
12  
13  
14  
15  
16  
17  
18  
19  
20  
21  
22  
23  
24  
25  
26  
27  
28  
29  
30  
31  
32  
33  
34  
35  
36  
37  
38  
39  
40  
41  
42  
43  
44  
45  
46  
47  
48  
49  
50  
51  
52  
53  
54  
55  
56  
57  
58  
59  
60

|                            |                                                                                                                                 |
|----------------------------|---------------------------------------------------------------------------------------------------------------------------------|
| Heading</b>:               |                                                                                                                                 |
| Secondary Subject Heading: | Intensive care                                                                                                                  |
| Keywords:                  | Adult palliative care < PALLIATIVE CARE, COVID-19, Adult intensive & critical care < INTENSIVE & CRITICAL CARE, PAIN MANAGEMENT |
|                            |                                                                                                                                 |

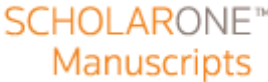

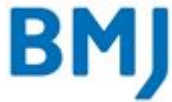

I, the Submitting Author has the right to grant and does grant on behalf of all authors of the Work (as defined in the below author licence), an exclusive licence and/or a non-exclusive licence for contributions from authors who are: i) UK Crown employees; ii) where BMJ has agreed a CC-BY licence shall apply, and/or iii) in accordance with the terms applicable for US Federal Government officers or employees acting as part of their official duties; on a worldwide, perpetual, irrevocable, royalty-free basis to BMJ Publishing Group Ltd ("BMJ") its licensees and where the relevant Journal is co-owned by BMJ to the co-owners of the Journal, to publish the Work in this journal and any other BMJ products and to exploit all rights, as set out in our [licence](#).

The Submitting Author accepts and understands that any supply made under these terms is made by BMJ to the Submitting Author unless you are acting as an employee on behalf of your employer or a postgraduate student of an affiliated institution which is paying any applicable article publishing charge ("APC") for Open Access articles. Where the Submitting Author wishes to make the Work available on an Open Access basis (and intends to pay the relevant APC), the terms of reuse of such Open Access shall be governed by a Creative Commons licence – details of these licences and which [Creative Commons](#) licence will apply to this Work are set out in our licence referred to above.

Other than as permitted in any relevant BMJ Author's Self Archiving Policies, I confirm this Work has not been accepted for publication elsewhere, is not being considered for publication elsewhere and does not duplicate material already published. I confirm all authors consent to publication of this Work and authorise the granting of this licence.

1  
2  
3 **Comorbidities, symptoms, and end-of-life medication use in hospitalized decedents before and during the**  
4 **COVID-19 pandemic: a retrospective regional cohort study in Ottawa, Canada**  
5  
6

7 Peter Lawlor DMed FRCPI MMedSc\*

8 Clinician Investigator, Ottawa Hospital Research Institute,

9 Senior Investigator, Bruyère Research Institute

10 Professor, Division of Palliative Care, Dept of Medicine, University of Ottawa

11 [plawlor@bruyere.org](mailto:plawlor@bruyere.org)

12 ORCID ID: 0000-0001-7319-1395 [Corresponding Author]

13  
14  
15  
16  
17  
18  
19  
20 Leila Cohen MD\*

21 Palliative Care Physician, Department Medicine, The Ottawa Hospital

22 [lecohen@toh.ca](mailto:lecohen@toh.ca)

23  
24  
25  
26  
27 Samantha Rose Adeli RD

28 MS2, Class of 2024, Faculty of Medicine, University of Ottawa

29 [sadel029@uottawa.ca](mailto:sadel029@uottawa.ca)

30  
31  
32  
33  
34 Ella Besserer

35 Physician Assistant Student Y2, The University of Toronto Class of 2022

36 [ellabesserer@gmail.com](mailto:ellabesserer@gmail.com)

37  
38  
39  
40  
41 Valérie Gratton MD

42 Assistant Professor, Division of Palliative Care, Department of Medicine, University of Ottawa

43 Palliative Care Physician, Montfort Hospital

44 Clinical Researcher, Institut du Savoir Montfort

45 [valeriegratton@montfort.on.ca](mailto:valeriegratton@montfort.on.ca)

46  
47  
48  
49  
50  
51 Rebekah Murphy MD

52 Palliative Care Physician, Department Medicine, The Ottawa Hospital

53 [RMurphy@bruyere.org](mailto:RMurphy@bruyere.org)

1  
2  
3  
4  
5 Grace Warmels BA MD CCFP(PC)

6 Palliative Care Physician, Department Medicine, The Ottawa Hospital

7  
8 Clinician Investigator, Ottawa Hospital Research Institute; Lecturer, Division of Palliative Care, Department of  
9 Medicine, University of Ottawa

10  
11 [gwarmels@toh.ca](mailto:gwarmels@toh.ca)  
12  
13

14  
15 Adrianna Bruni MD

16 Palliative Care Physician, Department Medicine, The Ottawa Hospital

17  
18 [adbruni@toh.ca](mailto:adbruni@toh.ca)  
19  
20

21  
22 Monisha Kabir

23 Research Associate, Bruyère Research Institute

24  
25 [mkabir3@uottawa.ca](mailto:mkabir3@uottawa.ca)  
26

27 ORCID ID: 0000-0002-4456-7661  
28  
29

30  
31 Chelsea Noel

32 Research Coordinator, Bruyère Research Institute

33  
34 [chelseaannenoel@gmail.com](mailto:chelseaannenoel@gmail.com)  
35  
36

37  
38 Brandon Heidinger

39 Research Coordinator, Bruyère Research Institute

40  
41 [bheidinger2026@meds.uwo.ca](mailto:bheidinger2026@meds.uwo.ca)  
42  
43

44  
45 Koby Anderson

46 Research Assistant, Bruyère Research Institute

47  
48 [KAnderson@bruyere.org](mailto:KAnderson@bruyere.org)  
49  
50

51  
52 Kyle Arsenault-Mehta MD

53 PGY4 Resident in Psychiatry, University of Ottawa

54  
55 [karse056@uottawa.ca](mailto:karse056@uottawa.ca)  
56  
57  
58  
59



1  
2  
3  
4  
5 Krista Wooller MD

6 Physician, Department of Medicine, The Ottawa Hospital

7  
8 Assistant Professor, University of Ottawa

9  
10 [krwooller@toh.ca](mailto:krwooller@toh.ca)

11  
12  
13 Julie Lapenskie MScAH

14 Research Associate and Manager, Ottawa Hospital Research Institute and Bruyère Research Institute

15  
16  
17 [JLapenskie@bruyere.org](mailto:JLapenskie@bruyere.org)

18  
19  
20 Colleen Webber PhD

21 Senior Research Associate, The Ottawa Hospital Research Institute

22  
23  
24 [cwebber@ohri.ca](mailto:cwebber@ohri.ca)

25  
26 ORCID ID: 0000-0001-9193-5386

27  
28  
29 Daniel Bédard MSc

30 Research Associate, Institut du Savoir Montfort

31  
32  
33 [danielbedard@montfort.on.ca](mailto:danielbedard@montfort.on.ca)

34  
35  
36 Paula Enright MD

37 Palliative Care Physician, Department of Medicine, The Ottawa Hospital

38  
39 Assistant Professor, Division of Palliative Care, Department of Medicine, University of Ottawa

40  
41  
42 [penright@toh.ca](mailto:penright@toh.ca)

43  
44  
45 Isabelle Desjardins MD

46 Clinician Educator, Department of Medicine, University of Ottawa

47  
48  
49 [idesjardins@toh.ca](mailto:idesjardins@toh.ca)

50  
51  
52 Khadija Bhimji MSc MD FRCPC

53 Palliative Care Physician, Queensway Carleton Hospital

54  
55 Assistant Professor, Division of Palliative Care, Department of Medicine, University of Ottawa

1  
2  
3 [KBhimji@toh.ca](mailto:KBhimji@toh.ca)  
4  
5

6  
7 Claire Dyason MD

8 Palliative Care Physician, Department of Medicine, Queensway Carleton Hospital

9  
10 Lecturer, Division of Palliative Care, Dept of Medicine, University of Ottawa

11  
12 [cdyason@cmpaottawa.ca](mailto:cdyason@cmpaottawa.ca)  
13  
14

15 Akshai Iyengar MSc MD FRCPC

16 Medical Director, Department of Critical Care Medicine, Queensway Carleton Hospital

17  
18 Assistant Professor, University of Ottawa

19  
20  
21 [aiyengar@qch.on.ca](mailto:aiyengar@qch.on.ca)  
22  
23

24 Shirley H Bush MBBS DRCOG DCH MRCGP PgDip Pall Med FChPM

25 Clinician Investigator, Ottawa Hospital Research Institute and Bruyère Research Institute

26  
27 Associate Professor, Division of Palliative Care, Dept of Medicine, University of Ottawa

28  
29  
30 [sbush@bruyere.org](mailto:sbush@bruyere.org)  
31

32 ORCID ID: 0000-0001-8907-1283  
33  
34

35 Sarina Isenberg MA PhD

36 Bruyère Chair in Mixed Methods Palliative Care Research, Bruyère Research Institute

37  
38 Assistant Professor, Division of Palliative Care, Department of Medicine, University of Ottawa

39  
40 Assistant Professor, Department of Family and Community Medicine, University of Toronto

41  
42 [sisenberg@bruyere.org](mailto:sisenberg@bruyere.org)  
43

44 ORCID ID: 0000-0001-6059-5366  
45  
46

47 Peter Tanuseputro MD

48 Scientist, Clinical Epidemiology Program, Ottawa Hospital Research Institute

49  
50 Investigator, Bruyère Research Institute, Assistant Professor, Division of Palliative Care, Dept of Medicine,  
51 University of Ottawa

52  
53 [ptanuseputro@toh.ca](mailto:ptanuseputro@toh.ca)  
54  
55  
56  
57  
58  
59

1  
2  
3 Brandi Vanderspank-Wright PhD RN CNCC(C)

4 Associate Professor, Faculty of Health Sciences, School of Nursing, University of Ottawa

5  
6 Affiliate Investigator, Ottawa Hospital Research Institute

7  
8 [bvanders@uottawa.ca](mailto:bvanders@uottawa.ca)

9  
10 ORCID ID: 0000-0002-1908-8212

11  
12  
13 James Downar MDCM MHSc

14 Professor, Head of the Division of Palliative Care, Department of Medicine, University of Ottawa

15  
16 Department of Palliative Care, Élisabeth Bruyère Hospital

17  
18 [jdownar@toh.ca](mailto:jdownar@toh.ca)

19  
20 ORCID ID: 0000-0001-7479-1560

21  
22  
23 Henrique Parsons MD MSc

24 Clinician Investigator, Ottawa Hospital Research Institute, Bruyère Research Institute

25  
26 Associate Professor, Division of Palliative Care, Department of Medicine, University of Ottawa

27  
28 [hparsons@toh.ca](mailto:hparsons@toh.ca)

29  
30  
31  
32  
33 **\*Joint first authors**

34  
35  
36 **Corresponding Author Details:**

37 Dr Peter G Lawlor,

38 Bruyère Continuing Care, 43 Bruyère Street, Ottawa, Ontario, Canada K1N 5C8

39  
40 Email: [plawlor@bruyere.org](mailto:plawlor@bruyere.org)

41  
42 Tel: +16135626262

43  
44 Fax: +16135626371

**ABSTRACT**

**Objective:** To compare comorbidities, symptoms, and end-of-life (EoL) palliative medication (antisecretories, opioids, antipsychotics and sedatives) use among decedents before and during the COVID-19 pandemic.

**Design:** In a retrospective cohort study, decedent records in 3 acute care hospitals were abstracted, generating a pre-pandemic (November 2019-February 2020) group (Pre-COVID) and 2 intra-pandemic (March-August 2020, Wave 1) groups, one without (COVID-ve) and one with COVID-19 infection (COVID+ve). Control group decedents were matched 2:1 on age, sex and care service (Medicine/Intensive Care Unit (ICU)) with COVID+ve decedents.

**Setting:** Three regional acute care teaching hospitals in Ottawa, Canada

**Participants:** Decedents (N=425): COVID+ve (n=85), COVID-ve (n=170) and Pre-COVID (n=170).

**Main outcome measures:** Data were abstracted regarding demographics, admission comorbidities and symptoms, and EoL medication use; opioid doses were standardized to parenteral morphine equivalent daily dose (MEDD), and the predictors of upper quartile MEDD in the last 24 hours of life were examined in multivariable logistic regression with adjusted odds ratios (aORs) and 95% confidence intervals (CIs).

**Results:** The prevalence of dementia (41% vs 28% and 26%,  $p=0.03$ ), breathlessness (63.5% vs 42% and 47%,  $p<0.01$ ), cough (40% vs 27% and 19%,  $p<0.01$ ) and fever (54% vs 9% and 13.5%) was higher in COVID+ve vs Pre-COVID and COVID-ve groups, respectively. The median (interquartile range) of MEDD over the last 72 hours of life was 16.7, (9-36.5) vs 13.5 (5.7-21.8) and 10.5 (5.3-23.8) for COVID+ve vs Pre-COVID and COVID-ve groups, respectively, ( $p=0.007$ ). Male sex, COVID+ve grouping, ICU death, and high-flow nasal cannula use predicted upper quartile MEDD dose, aORs (CIs): 1.84 (1.05-3.22), 2.62 (1.29-5.3), 5.14 (2.47-10.7) and 1.93 (1.05-3.52), respectively. COVID+ve group decedents used highest lorazepam and propofol doses.

**Conclusions:** COVID-19 decedents, particularly those in ICU, required higher EoL opioid and sedating medication doses than matched pre- or intra-pandemic controls. These findings should inform and guide clinical practice.

**Abstract:** 300 words

**Main manuscript:** 3885 words

1  
2  
3 **Tables:** 4 (plus 2 Supplementary, Appendix 1 and 3)

4  
5 **Figures:** 1 (plus 1 Supplementary, Appendix 2)

6  
7  
8 **Keywords:** COVID-19, adult palliative care, adult intensive & critical care, sedation, medications, opioid, morphine  
9 equivalent daily dose  
10

11  
12  
13  
14  
15  
16 **Strengths and limitations of this study**

- 17  
18  
19  
20  
21  
22  
23  
24  
25  
26  
27  
28  
29  
30  
31  
32  
33  
34  
35  
36  
37  
38  
39  
40  
41  
42  
43  
44  
45  
46  
47  
48  
49  
50  
51  
52  
53  
54  
55  
56  
57  
58  
59  
60
- The decedent cohort was representative of the source population in all adult acute care hospitals in a large urban region, and use of control groups from within and prior to the COVID-19 pandemic facilitated valid and unique comparisons.
  - This study relates to Wave 1 of the pandemic. It is possible that symptom burden, and thus use of symptom control medications, has changed with subsequent waves.
  - Although rigorous training and accuracy checks were conducted in relation to data abstraction, abstractors were not blinded in relation to the study hypothesis, posing a potential source of bias.
  - The study's retrospective design and recording of admission symptom assessment and comorbidity data without similar data, including medication efficacy and side-effects, from within the more immediate end-of-life period are obvious limitations.
  - The generalizability of our study findings is largely limited to end-of-life care for hospitalized decedents, whereas many of the COVID-19 related deaths in Wave 1 of the pandemic occurred in nursing homes.

## INTRODUCTION

Globally, by mid-January 2023, over six million deaths due to COVID-19 (Coronavirus 2019) are reported to have occurred.(1) However, a bigger picture estimate of overall excess mortality due to the COVID-19 pandemic suggests a figure of just over 18 million deaths by the end of 2021.(2) These estimates highlight the need for effective integration of specialist palliative care within hospitals,(3,4) and adoption of a palliative care approach to ensure end-of-life care provision in the COVID-19 pandemic.(5-7) Although the uptake of vaccines has helped to reduce COVID-19 disease severity and mortality,(8) the mortality risk remains higher with chronic medical conditions, socioeconomic deprivation, and in certain ethnic groups.(9, 10) Prior to vaccination uptake, earlier in the pandemic, infection with COVID-19 posed a greater risk of hospitalization, Intensive Care Unit (ICU) admission and subsequent death, particularly for older people, those with frailty and chronic medical comorbidities.(11-13)

Among those hospitalized with severe COVID-19 infection, dyspnoea, cough, fatigue, delirium, agitation and myalgia are the most prevalent symptoms.(14-18) Both pharmacological and respiratory support interventions are often required for symptom control.(12,19,20) In caring for those dying of COVID-19 infection, clinicians, particularly those with limited palliative expertise, are often faced with urgent need for information and support,(21,22) and are guided in their use of pharmacological interventions by expert publications and specific guidelines.(6,7,23,24)

Palliative medications used in severe COVID-19 infection include: opioids for pain and dyspnoea; benzodiazepines for anxiety, agitation and dyspnoea; antipsychotics for refractory delirium symptoms; and antisecretory medications for airway secretions.(20) Phenobarbitone and propofol are also used for sedation,(25,26) the latter mainly in ICU settings. However, higher-level evidence derived directly from COVID-19 infected study populations for the efficacy and safety of pharmacological interventions in targeting symptom control is limited.(27,28) Furthermore, guidelines addressing end-of-life symptom management in the COVID-19 context, for example dyspnoea, are largely informed by primary studies conducted pre-pandemically in patients with either cancer or COPD,(29) raising potential generalizability concerns. There is also a paucity of real world reported data on palliative medication use during the pandemic.(30,31) Although most reports suggest that opioid requirements for end-of-life symptom management in COVID-19 infection are similar to other end-of-life

1  
2  
3 conditions,(28,30,31) some report higher requirements.(32,33) Based on clinical experience, we hypothesized that  
4  
5 higher opioid and sedative doses are needed to control symptoms in hospitalized patients dying of COVID-19  
6  
7 infection.  
8  
9

10 We conducted a study with the primary objective of comparing palliative medication use in the last 72  
11  
12 hours of life among three hospitalized decedent groups: a pre-pandemic group and two groups from Wave 1 of the  
13  
14 pandemic, one who died of COVID-19 infection, and the other who died of other causes without COVID-19  
15  
16 infection. Group comparisons of admission comorbidity and symptom prevalence, and respiratory/circulatory  
17  
18 support use were additional objectives.  
19

## 20 21 **METHODS**

### 22 23 *Study design*

24  
25 As part of a larger project on grief and bereavement in the COVID-19 pandemic,(34,35) we conducted a  
26  
27 retrospective multicentre matched cohort study of decedents' documented end-of-life care in acute care hospitals.  
28  
29 The study is reported according to the Strengthening the Reporting of Observational studies in Epidemiology  
30  
31 (STROBE) criteria.(36)  
32  
33

### 34 35 *Setting*

36  
37 The study population source consisted of inpatients in Ottawa (city and catchment area population 1.4 million),  
38  
39 Canada, who died in the city's three adult acute care hospital sites between November 1, 2019 and August 31,  
40  
41 2020. Site 1, Hôpital Montfort is a tertiary hospital with 289 inpatient beds. Site 2, Queensway-Carleton Hospital is  
42  
43 a tertiary hospital with 264 inpatient beds. Site 3, The Ottawa Hospital is a quaternary hospital with 1271 inpatient  
44  
45 beds. All sites used established electronic health records (EHR) software systems, MEDITECH (Medical Information  
46  
47 Technology, Inc.) at Sites 1 and 2, and Epic (Epic Systems Corporation) at Site 3, in documenting patient care.  
48  
49

### 50 51 *Key exposures*

52  
53 Between March 1 and August 31, 2020, a total of 85 people died of COVID-19 infection in the region's three acute  
54  
55 care hospitals. The study's key exposures related to COVID-19 infection status during decedents' last hospital  
56  
57  
58  
59  
60

1  
2  
3 admission and when the admission occurred in relation to the pandemic. Three decedent study groups were  
4 identified on the basis of these exposures: a Pre-COVID group who died between November 1<sup>st</sup> 2019 and February  
5 29<sup>th</sup> 2020; and 2 groups who died between March 1<sup>st</sup> 2020 and August 31<sup>st</sup> 2020, within Wave 1 of the pandemic,  
6  
7 one who died of COVID-19 infection, and the other, without any record of COVID-19 during their hospital  
8 admission, designated COVID+ve and COVID-ve, respectively.  
9  
10  
11  
12

### 13 *Participants*

14  
15  
16 Adult ( $\geq 18$  years old) decedents were included if they died in ICU or under the care of internal medicine in the  
17 designated study period. Both Emergency Department decedents and those primarily under surgical care were  
18 excluded. The index study group was COVID+ve (n=85), and each of these decedents was included. Using a 2: 1  
19 ratio, the control Pre-COVID (n=170) and COVID-ve (n=170) group members were matched with COVID+ve  
20 members at each site on the basis of age ( $\pm 5$  years), sex and care service (Medicine or ICU) at the time of death.  
21  
22  
23  
24  
25  
26

### 27 *Data sources/measurement*

28  
29  
30 Anonymized EHR data, including study variables were abstracted by teams of internal/palliative medicine  
31 physicians and two research assistants at each site, and entered into a common electronic study database. All  
32 abstractors received training regarding abstraction requirements. A senior study team member conducted a  
33 duplicate data abstraction of 154 (35%) of the patient records to confirm accuracy of details.  
34  
35  
36  
37  
38

### 39 *Variables*

40  
41  
42 Study group designation was based on EHR documentation of COVID-19 infection status, date of death and death  
43 certification. Demographic variables included age, sex, admission referral source, acute care site, care service at  
44 death, and admission duration (days). Based on EHR documentation, comorbidities and symptoms at admission,  
45 and respiratory/circulatory support use during admission, were recorded (Yes/No) by abstractors, **Supplemental**  
46  
47  
48 **Table, Appendix 1.** Abstractors recorded medications prescribed (yes/no) and administered (yes/no) in the last 72  
49 hours of life. Administered doses were totalled for each 24-hour interval (T3:  $> 48$  and  $\leq 72$  hours, T2:  $> 24$  and  $\leq$   
50  
51  
52 48 hours, and T1: the last 24 hours of life) within this period, where available, and recorded for the following:  
53  
54  
55  
56 opioids (morphine, fentanyl, hydromorphone), antisecretory medications (glycopyrrolate and hyoscine  
57  
58  
59  
60



1  
2  
3 hydrobromide), antipsychotics (haloperidol and methotrimeprazine), benzodiazepines (lorazepam and  
4 midazolam), other sedating medication (phenobarbitone and propofol). Opioid doses were recorded in parenteral  
5 equivalent using a standard oral to parenteral ratio of 2:1.(37)  
6  
7  
8

#### 9 10 *Patient and public involvement*

11  
12 Decedents' study data were retrospectively acquired and are part of a project involving the prospective evaluation  
13 of grief in decedents' bereaved family members. Although there was no direct patient or public involvement in the  
14 project's retrospective component, the study team engaged with three knowledge user organizations (Bereaved  
15 Families of Ontario, Canadian Virtual Hospice and Champlain Hospice Palliative Care Program), whose  
16 representatives collaborated with the study planning team and were co-applicants in funding applications for the  
17 overall project.  
18  
19  
20  
21  
22  
23

#### 24 25 *Bias*

26  
27  
28 Data abstractors were not blinded to the study objectives and consequently there was potential for  
29 misclassification bias.  
30  
31

#### 32 33 *Study size*

34  
35 The sample size (N=425) was predetermined, based on the inclusion of all known Wave 1 deaths due to COVID-19  
36 in the index group (COVID+ve, n=85), and subsequent 2:1 matching to generate the other two study groups.  
37  
38  
39

#### 40 41 *Quantitative variables*

42  
43 The administered opioid doses abstracted for each 24-hour period in the last 72 hours of life were used to  
44 calculate the parenteral morphine equivalent daily dose (MEDD) in mg using standard equianalgesic ratios.(37)  
45  
46

47  
48 An individual mean total 24-hour medication dose was calculated for palliative medications administered to each  
49 patient who had data for one or more of the 24-hour periods in their last 72 hours of life; the median  
50 (interquartile, Q1-Q3 range) of these individual mean doses was used as an aggregate summary measure in  
51 relation to both opioids (MEDD) and non-opioid medications administered in this period. Also, the maximum 24-  
52  
53  
54  
55  
56  
57  
58  
59  
60

hour dose of opioid, midazolam and propofol within the last 72 hours of life were determined for study group comparison. Continuous variables were expressed as mean  $\pm$  standard deviation (SD) unless otherwise indicated.

### *Statistical methods*

Demographic characteristics, palliative care consultation, comorbidities, symptoms, occurrence of medication use, median group values for individual mean 24-hour doses and MEDD values, and maximum MEDD, midazolam and propofol doses within the last 72 hours of life were compared among study groups, using a chi-square test for categorical variables, and an ANOVA or Kruskal-Wallis test for continuous variables, as appropriate. Subgroup analyses for MEDD at T1 were conducted in relation to site and care service at death. The association of variables with the upper quartile of MEDD at T1 was examined in unadjusted bivariable and adjusted multivariable logistic regression analyses, reporting odds ratios and confidence intervals (CIs). Based on clinical relevance and/or having a p value  $<0.25$  in bivariable analyses, variables were selected for a forced entry multivariable model with adjusted odds ratios (aORs). Terms were tested in the model for study group, age, sex and care service interactions. Statistical significance, using Stata (StataCorp. 2015. *Stata Statistical Software: Release 14*. College Station, TX: StataCorp LP.) for analyses, was set at  $p<0.05$ .

## **RESULTS**

### *Study sample*

The derivation of the study groups is summarized in **Supplemental Figure, Appendix 2**. Data from all COVID+ve decedents (n=85) and all Pre-COVID (N=170) and COVID-ve (n=170) matched groups were used in comparison of admission comorbidity and symptom prevalence, and use of respiratory or circulatory support. To enable valid group comparisons, decedents who died  $< 24$  hours of admission (n=14) were excluded in medication analyses. Demographic characteristics are summarized in **Table 1**.

**Table 1 Demographic characteristics of study groups according to COVID-19 status and time periods**

| Demographic characteristics | Time periods and designated study groups |                              | P values |
|-----------------------------|------------------------------------------|------------------------------|----------|
|                             | Nov 2019-Feb 2020                        | Mar 2020 – Aug 2020 (Wave 1) |          |
|                             |                                          |                              |          |

|                                     | <b>Pre-COVID Group<br/>N=170 (%)*</b> | <b>COVID-ve Group<br/>N=170 (%)*</b> | <b>COVID+ve Group<br/>N=85 (%)*</b> |                  |
|-------------------------------------|---------------------------------------|--------------------------------------|-------------------------------------|------------------|
| <b>Age</b>                          |                                       |                                      |                                     |                  |
| <b>Years, mean ± SD</b>             | 79.5 ± 12.3                           | 79.2 ± 12.3                          | 78.9 ± 12.2                         | 0.942            |
| <b>Sex</b>                          |                                       |                                      |                                     |                  |
| <b>Male</b>                         | 100 (58.8)                            | 100 (58.8)                           | 50 (58.8)                           | 1.0              |
| <b>Hospital location</b>            |                                       |                                      |                                     |                  |
| <b>Site 1, n=155, (row %)</b>       | 62 (40)                               | 62 (40)                              | 31 (20)                             | 1.0              |
| <b>Site 2, n=100, (row %)</b>       | 40 (40)                               | 40 (40)                              | 20 (20)                             |                  |
| <b>Site 3, n=170, (row %)</b>       | 68 (40)                               | 68 (40)                              | 34 (20)                             |                  |
| <b>Care service at death</b>        |                                       |                                      |                                     |                  |
| <b>Medicine service/unit</b>        | 118 (69.4)                            | 122 (71.7)                           | 62 (72.9)                           | 0.814            |
| <b>Intensive Care Unit</b>          | 52 (30.6)                             | 48 (28.2)                            | 23 (27.1)                           |                  |
| <b>Admission referral source</b>    |                                       |                                      |                                     |                  |
| <b>Home</b>                         | 99 (58.2)                             | 109 (64.1)                           | 31 (36.5)                           | <b>&lt;0.001</b> |
| <b>Retirement Home</b>              | 36 (21.2)                             | 34 (20.0)                            | 11 (11.8)                           |                  |
| <b>Nursing Home</b>                 | 22 (12.9)                             | 8 (4.7)                              | 43 (50.6)                           |                  |
| <b>Complex Continuing Care</b>      | 2 (1.2)                               | 2 (1.2)                              | 0 (0.0)                             |                  |
| <b>Other</b>                        | 11 (6.5)                              | 17 (10.0)                            | 1 (1.2)                             |                  |
| <b>Admission duration category</b>  |                                       |                                      |                                     |                  |
| <b>&lt; 24 hours</b>                | 7 (4.1)                               | 7 (4.1)                              | 0 (0)                               | 0.061            |
| <b>≥ 24 and &lt; 48 hours</b>       | 26 (15.3)                             | 18 (10.6)                            | 6 (7.1)                             |                  |
| <b>≥ 48 hours and &lt; 72 hours</b> | 16 (9.4)                              | 8 (4.7)                              | 5 (5.9)                             |                  |
| <b>≥ 72 hours</b>                   | 121 (71.2)                            | 137 (80.6)                           | 74 (87.1)                           |                  |
| <b>Palliative care involvement</b>  |                                       |                                      |                                     |                  |
| <b>Consult requested</b>            | 70 (41.2)                             | 71 (41.8)                            | 26 (30.6)                           | 0.184            |
| <b>Consult completed</b>            | 67 (39.4)                             | 67 (39.4)                            | 25 (29.4)                           | 0.234            |

|                                                              |         |         |          |       |
|--------------------------------------------------------------|---------|---------|----------|-------|
| <b>Days from consult completion to death (median, Q1-Q3)</b> | 4 (1-9) | 3 (1-6) | 3 (2-12) | 0.577 |
|--------------------------------------------------------------|---------|---------|----------|-------|

\* Column numbers refer to number of persons (%) in respective study groups unless stated otherwise

There were no study group differences in age, sex, and care service at death, reflecting effective matching across study sites. Referral from nursing homes was highest (50.6%) in the COVID+ve group, compared to 12.9% and 4.7% in the Pre-COVID and COVID-ve groups, respectively ( $p < 0.001$ ). Palliative care consultation rates were similar across study groups but lowest (29.4%) in the COVID+ve group.

#### *Clinical characteristics*

Admission comorbidities and symptoms in addition to use of respiratory or circulatory support are summarized in **Supplemental Table, Appendix 3**. Atrial fibrillation was less prevalent in the COVID+ve group (15.3%) compared to the Pre-COVID (26.5%) and COVID-ve (32.4%) groups ( $p = 0.015$ ). However, dementia and miscellaneous other comorbidities occurred more frequently (41.2% and 77.7%,  $p = 0.032$  and  $0.018$ , respectively) in the COVID+ve group compared to the Pre-COVID (27.7% and 63.5%, respectively) and COVID-ve groups (25.9% and 60.0%, respectively). In the COVID+ve group compared to other groups, pain occurred less frequently (10.6% vs 29.4% and 28.8%,  $p = 0.002$ ), but breathlessness, (63.5% vs 42.4% and 47.1%,  $p = 0.006$ ), cough (40.0% vs 27.1% and 19.4%,  $p = 0.002$ ) and fever (54.1% vs 9.4% and 13.5%,  $p < 0.001$ ) occurred more frequently. High-flow nasal cannula use was more frequent in the COVID+ve group vs PreCOVID and COVID-ve groups (54.1% vs 37.1% and 28.8%, respectively,  $p < 0.001$ )

#### *Medication use at end-of-life*

Opioids were prescribed for 92.4%, 91.2% and 95.3% of the Pre-COVID, COVID-ve and COVID+ve groups (including those who died < 24 hours of admission, respectively). The median and interquartile MEDD values for study groups in relation to each 24-hour interval (T3, T2 and T1) in which decedents received an opioid, is presented in **Figure 1**, illustrating a progressive increase according to proximity to death, in both the proportion of decedents receiving opioids and in doses administered. Group comparison of opioid use within the last 72 hours of life is summarized in **Table 2**.

Table 2 Comparative inpatient opioid use within the last 72 hours of life among decedent study groups

| Opioid use in last 72 hours of life                                              | Decedent reference periods and study groups |                              |                             | P values         |
|----------------------------------------------------------------------------------|---------------------------------------------|------------------------------|-----------------------------|------------------|
|                                                                                  | Nov 2019-Feb 2020                           | Mar 2020 – Aug 2020 (Wave 1) |                             |                  |
|                                                                                  | Pre-COVID Group<br>N=163 (%)*               | COVID-ve Group<br>N=163 (%)* | COVID+ve Group<br>N=85 (%)* |                  |
| <b>Type of opioid administered†</b>                                              |                                             |                              |                             |                  |
| <b>Any opioid, n (%)</b>                                                         | 145 (89.0%)                                 | 146 (89.6%)                  | 81 (95.3%)                  | 0.236            |
| <b>Morphine, n (%)</b>                                                           | 63 (38.7%)                                  | 65 (39.9%)                   | 40 (47.1%)                  | 0.418            |
| <b>Hydromorphone, n (%)</b>                                                      | 92 (56.4%)                                  | 93 (57.1%)                   | 52 (61.2%)                  | 0.758            |
| <b>Fentanyl, n (%)</b>                                                           | 25 (15.3%)                                  | 15 (9.2%)                    | 6 (7.1%)                    | 0.085            |
|                                                                                  |                                             |                              |                             |                  |
| <b>Total MEDD‡ for each 24-hour period (T3-T1) within last 72 hours of life§</b> |                                             |                              |                             |                  |
| <b>T3: mg (Q1-Q3)</b>                                                            | <b>10.0 (5.0-18.5)</b>                      | <b>10.0 (4.4-20.0)</b>       | <b>14.5 (7.5-48.0)</b>      | <b>0.041</b>     |
| <b>No. of decedents: n (%)</b>                                                   | <b>83 (50.9%)</b>                           | <b>90 (55.2%)</b>            | <b>58 (68.2%)</b>           | <b>0.032</b>     |
| <b>T2: mg (Q1-Q3)</b>                                                            | <b>8.5 (4.3-18.8)</b>                       | <b>10.0 (5.0-24.0)</b>       | <b>18.3 (11.5-46.0)</b>     | <b>&lt;0.001</b> |
| <b>No. of decedents: n (%)</b>                                                   | 104 (63.8%)                                 | 105 (64.4%)                  | 63 (74.1%)                  | 0.220            |
| <b>T1: mg (Q1-Q3)</b>                                                            | <b>15.0 (6.5-29.8)</b>                      | <b>12.5 (6.3-25.0)</b>       | <b>20.0 (12.0-50)</b>       | <b>0.011</b>     |
| <b>No. of decedents: n (%)</b>                                                   | 137 (84.1%)                                 | 143 (87.7%)                  | 79 (92.9%)                  | 0.133            |
|                                                                                  |                                             |                              |                             |                  |
| <b>T1 MEDD by care service at death</b>                                          |                                             |                              |                             |                  |
| <b>Internal Medicine: mg (Q1-Q3)</b>                                             | 12.3 (5.8-24.5)                             | 10.0 (5.0-20.5)              | 14.5 (8.0-26.3)             | 0.140            |
| <b>No. of decedents: n (subgroup %)</b>                                          | 96/117 (82.1%)                              | 104/119 (87.4%)              | 56/62 (90.3%)               | 0.265            |
| <b>Intensive Care Unit: mg (Q1-Q3)</b>                                           | <b>25.0 (14.4-49.5)</b>                     | <b>23.8 (10.5-45.0)</b>      | <b>52.5 (31.5-80.0)</b>     | <b>0.014</b>     |
| <b>No. of decedents: n (row %)</b>                                               | 41/46 (89.1%)                               | 39/44 (88.6%)                | 23/23 (100%)                | 0.245            |
|                                                                                  |                                             |                              |                             |                  |
| <b>T1 MEDD by hospital site</b>                                                  |                                             |                              |                             |                  |
| <b>Site 1: mg (Q1-Q3)</b>                                                        | 15.0 (9.0-27.5)                             | 11.3 (5.0-25.0)              | 16.5 (10.0-45.0)            | 0.199            |
| <b>No. of decedents: n (subgroup %)</b>                                          | 55/60 (91.6%)                               | 49/57 (86.0%)                | 26/31 (83.9%)               | 0.480            |
| <b>Site 2: mg (Q1-Q3)</b>                                                        | <b>11.0 (5.8-32.5)</b>                      | <b>16.8 (8.0-28.4)</b>       | <b>31.7 (12.8-63.8)</b>     | <b>0.019</b>     |
| <b>No. of decedents: n (subgroup %)</b>                                          | 32/38 (84.2%)                               | 36/39 (92.3%)                | 20/20 (100.0%)              | 0.130            |
| <b>Site 3: mg (Q1-Q3)</b>                                                        | 16.5 (8.0-33.8)                             | 10.5 (6.0-22.5)              | 18.0 (9.0-35.0)             | 0.105            |
| <b>No. of decedents: n (subgroup %)</b>                                          | <b>50/65 (76.0%)</b>                        | <b>58/67 (86.6%)</b>         | <b>33/34 (97.1%)</b>        | <b>0.026</b>     |

| Patient groups for aggregate MEDD summary measures estimation <sup>  </sup> |                         |                         |                          |              |
|-----------------------------------------------------------------------------|-------------------------|-------------------------|--------------------------|--------------|
| <b>Decedent administered opioid n (%)</b>                                   | 145 (89.0%)             | 146 (89.6%)             | 81 (95.3%)               | 0.236        |
| <b>Internal Medicine: n (subgroup %)</b>                                    | 102/117 (87.2%)         | 105/119 (88.2%)         | 58 (93.6%)               | 0.414        |
| <b>Intensive Care: n (subgroup %)</b>                                       | 43/46 (93.5%)           | 41/44 (93.2%)           | 23/23 (100%)             | 0.444        |
| <b>Aggregate MEDD measures</b>                                              |                         |                         |                          |              |
| <b>Maximum MEDD: mg (Q1-Q3)</b>                                             | <b>16.5 (7.5-30.0)</b>  | <b>15.0 (7.5-30.0)</b>  | <b>21.0 (12.0-54.5)</b>  | <b>0.012</b> |
| <b>Internal Medicine: mg (Q1-Q3)</b>                                        | 13.4 (6.0-27.5)         | 11.3 (6.8-22.5)         | 15.7 (8.0-30.0)          | 0.172        |
| <b>Intensive Care: mg (Q1-Q3)</b>                                           | <b>25.0 (14.4-55.0)</b> | <b>24 (11.3-54.5)</b>   | <b>59.5 (44.8-120.0)</b> | <b>0.005</b> |
| <b>Individual mean MEDD: mg (Q1-Q3)</b>                                     |                         |                         |                          |              |
| <b>Internal Medicine: mg (Q1-Q3)</b>                                        | 10.3 (5.0-17.3)         | 9.4 (4.5-15.0)          | 13.6 (6.7-24.7)          | 0.072        |
| <b>Intensive Care: mg (Q1-Q3)</b>                                           | <b>20.9 (11.5-38.5)</b> | <b>19.8 (10.0-44.8)</b> | <b>40.0 (24.9-64.2)</b>  | <b>0.009</b> |

\* Column proportions expressed as percentages in parentheses unless otherwise specified.

†Opioid administered to decedents in a minimum of one complete 24-hour admission period within the last 72 hours of life; data were excluded for 7 decedents each in the Pre-COVID and COVID-ve groups whose admission duration was < 24 hours.

‡MEDD: Morphine Equivalent Daily Dose, parenteral, mg; summarized as a median (interquartile range, Q1-Q3) value for each of the three decedent study groups.

§Designation based on hours before death: T3, > 48 and ≤ 72 hours; T2, > 24 and ≤ 48 hours; T1, last 24 hours as an inpatient

|| Based on exposure to a minimum of one complete inpatient 24-hour admission period (T3, T2 or T1) for opioid dose administration. Aggregate measures are reported as median group values (interquartile range, Q1-Q3)

Although more COVID+ve group patients (68.2% vs 50.9% and 55.2%,  $p=0.032$ ) received opioids in the T3 period, there were no other significant study group differences in opioid administration as a binary (yes/no) outcome, specifically in comparisons based on opioid type, T2 or T1 period MEDDs, care service at death, hospital site, or with reference to the 72-hour aggregate summary measures (individual mean and maximum dose). However, the median MEDD in the COVID+ve group at T1 was 20.0 (12.0-50.0) compared to 15.0 (6.5-29.8) and 12.5 (6.3-25.0) in the Pre-COVID and COVID-ve groups, respectively ( $p=0.011$ ). This group difference in MEDD was consistent at each

time point (T3-T1) and in relation to 72-hour aggregate summary measures. A site subgroup analysis at T1 revealed higher median MEDD in the COVID+ve group at Site 2. An additional subgroup analysis at T1 revealed a higher median MEDD in the COVID+ve group decedents who died in ICU but not in those who died in Medicine units/wards; a similar difference was also found in relation to the aggregate measures of opioid administration over the last 72 hours of life. The independent association of variables with MEDD was examined in multivariable logistic regression.

The logistic regression analyses examining the predictors of the T1 MEDD upper quartile ( $\geq 30\text{mg}$  of parenteral morphine) are summarized in **Table 3**.

**Table 3** Logistic regression analyses examining the association of variables with parenteral MEDD  $\geq 30\text{mg}$  (upper quartile) in the last 24 hours of life in those who received opioids (n=359)

| Variables examined           | Proportion of patients* (%) | Unadjusted OR <sup>†</sup><br>(95% CI) |             | P value | Adjusted OR <sup>†</sup><br>(95% CI) |             | P value |
|------------------------------|-----------------------------|----------------------------------------|-------------|---------|--------------------------------------|-------------|---------|
| Age of decedent <sup>‡</sup> | ...                         | 0.951                                  | (0.93-0.97) | <0.001  | 0.99                                 | (0.96-1.01) | 0.313   |
| Sex                          |                             |                                        |             |         |                                      |             |         |
| Female                       | 31/155 (20.0)               | 1                                      |             |         | 1                                    |             |         |
| Male                         | 64/204 (31.4)               | 1.82                                   | (1.12-2.99) | 0.016   | 1.84                                 | (1.05-3.22) | 0.034   |
| Study group                  |                             |                                        |             |         |                                      |             |         |
| Pre-COVID                    | 34/137 (24.8)               | 1                                      |             |         | 1                                    |             |         |
| COVID-ve                     | 30/143 (21.0)               | 0.804                                  | (0.46-1.41) | 0.445   | 0.95                                 | (0.51-1.76) | 0.866   |
| COVID+ve                     | 31/79 (39.2)                | 1.96                                   | (1.08-3.55) | 0.027   | 2.62                                 | (1.29-5.32) | 0.008   |
| Hospital site                |                             |                                        |             |         |                                      |             |         |
| Site 1                       | 32/130 (24.6)               | 1                                      |             |         | 1                                    |             |         |
| Site 2                       | 27/88 (30.7)                | 1.36                                   | (0.74-2.48) | 0.323   | 0.83                                 | (0.40-1.72) | 0.617   |
| Site 3                       | 36/141 (25.5)               | 1.05                                   | (0.61-1.82) | 0.862   | 0.51                                 | (0.25-1.05) | 0.067   |

|                                         |                      |              |                    |                  |  |             |                     |                  |
|-----------------------------------------|----------------------|--------------|--------------------|------------------|--|-------------|---------------------|------------------|
| <b>Care service at death</b>            |                      |              |                    |                  |  |             |                     |                  |
| <b>Medicine</b>                         | 45/256 (17.6)        | 1            |                    |                  |  | 1           |                     |                  |
| <b>ICU</b>                              | <b>50/103 (48.5)</b> | <b>4.42</b>  | <b>(2.68-7.31)</b> | <b>&lt;0.001</b> |  | <b>5.14</b> | <b>(2.47-10.70)</b> | <b>&lt;0.001</b> |
| <b>High-Flow Nasal Cannula</b>          |                      |              |                    |                  |  |             |                     |                  |
| <b>No</b>                               | 46/219 (21.0)        | 1            |                    |                  |  |             |                     |                  |
| <b>Yes</b>                              | <b>49/140 (35.0)</b> | <b>2.03</b>  | <b>(1.26-3.26)</b> | <b>0.004</b>     |  | <b>1.93</b> | <b>(1.05-3.52)</b>  | <b>0.033</b>     |
| <b>Palliative Care Consult</b>          |                      |              |                    |                  |  |             |                     |                  |
| <b>No</b>                               | 61/211 (28.9)        | 1            |                    |                  |  | 1           |                     |                  |
| <b>Consult completed</b>                | 34/148 (23.0)        | 0.733        | (0.45-1.19)        | 0.210            |  | 1.51        | (0.80-2.86)         | 0.205            |
| <b>Admission assessment<sup>§</sup></b> |                      |              |                    |                  |  |             |                     |                  |
| <b>Cognitive status</b>                 |                      |              |                    |                  |  |             |                     |                  |
| <b>Not impaired</b>                     | 71/229 (31.0)        | 1            |                    |                  |  | 1           |                     |                  |
| <b>Impaired</b>                         | <b>24/130 (18.5)</b> | <b>0.504</b> | <b>(0.30-0.85)</b> | <b>0.010</b>     |  | 0.85        | 0.46-1.57           | 0.606            |
| <b>Documented pain</b>                  |                      |              |                    |                  |  |             |                     |                  |
| <b>No</b>                               | 69/264 (26.0)        | 1            |                    |                  |  | 1           |                     |                  |
| <b>Yes</b>                              | 26/95 (27.4)         | 1.07         | (0.63-1.81)        | 0.815            |  | 1.48        | (0.80-2.74)         | 0.209            |
| <b>Active cancer</b>                    |                      |              |                    |                  |  |             |                     |                  |
| <b>No</b>                               | 67/275 (24.4)        | 1            |                    |                  |  | 1           |                     |                  |
| <b>Yes</b>                              | 28/84 (33.3)         | 1.55         | (0.91-2.64)        | 0.104            |  | 1.68        | (0.88-3.18)         | 0.114            |
| <b>Chronic Kidney disease</b>           |                      |              |                    |                  |  |             |                     |                  |
| <b>No</b>                               | 75/283 (26.5)        | 1            |                    |                  |  |             |                     |                  |
| <b>Yes</b>                              | 20/76 (26.3)         | 0.991        | (0.56-1.76)        | 0.974            |  |             |                     |                  |
| <b>Agitation</b>                        |                      |              |                    |                  |  |             |                     |                  |
| <b>No</b>                               | 89/330 (27.0)        | 1            |                    |                  |  |             |                     |                  |
| <b>Yes</b>                              | 6/29 (20.7)          | 0.706        | (0.28-1.79)        | 0.464            |  |             |                     |                  |



\*Proportion of patients in upper quartile MEDD ( $\geq 30$  mg of parenteral morphine) for T1 period (last 24 hours of life); †OR = Odds Ratio; ‡Treated as a continuous variable or covariate; §Documented on admission assessment.

In the unadjusted analyses, both older age and cognitive impairment were statistically significant negative predictors of the upper quartile MEDD, whereas male sex, COVID+ve group membership, death in ICU, and use of high-flow nasal cannula for oxygen delivery were positive predictors. In the multivariable model, only male sex, COVID+ve group membership, death in ICU, and use of high-flow nasal cannula remained statistically significant, all as positive predictors with aORs of 1.84 (1.05-3.22), 2.62 (1.29-5.3), 5.14 (2.47-10.7) and 1.93 (1.05-3.52), respectively. Potential variable interactions among COVID-19 study group status, age, sex and care service at death were tested in the model, and the interaction terms were not statistically significant.

Comparative non-opioid medication doses (mg) administered within the last 72 hours of life for the study groups are summarized in **Table 4**.

**Table 4 Comparative inpatient use of non-opioid End-of-Life medications within the last 72 hours of life among decedent study groups**

| Non-opioid medications administered in the last 72 hours of life * | Decedent reference periods and study groups |                              |                            | P values |
|--------------------------------------------------------------------|---------------------------------------------|------------------------------|----------------------------|----------|
|                                                                    | Nov 2019-Feb 2020                           | Mar 2020 – Aug 2020 (Wave 1) |                            |          |
|                                                                    | Pre-COVID Group†<br>N=163 (%)               | COVID-ve Group†<br>N=163 (%) | COVID+ve Group<br>N=85 (%) |          |
| <b>Antisecretory medications</b>                                   |                                             |                              |                            |          |
| <b>Glycopyrrolate, n (%)</b>                                       | 36 (22.1)                                   | 37 (22.7)                    | 12 (14.1)                  | 0.243    |
| <b>Mean 24-hour dose, mg‡</b>                                      | 0.5 (0.4-0.9)                               | 0.6 (0.4-1.2)                | 0.4 (0.4-0.6)              | 0.570    |
| <b>Scopolamine, n (%)</b>                                          | 20 (12.3)                                   | 21 (12.9)                    | 14 (16.5)                  | 0.635    |
| <b>Mean 24-hour dose, mg‡</b>                                      | 0.4 (0.4-0.9)                               | 0.4 (0.4-0.8)                | 0.5 (0.4-1.0)              | 0.909    |
|                                                                    |                                             |                              |                            |          |
| <b>Antipsychotic medications</b>                                   |                                             |                              |                            |          |
| <b>Haloperidol, n (%)</b>                                          | 32 (19.6)                                   | 25 (15.3)                    | 10 (11.8)                  | 0.257    |
| <b>Mean 24-hour dose, mg‡</b>                                      | 1.0 (0.5-1.3)                               | 1.0 (0.5-1.5)                | 1.4 (0.7-4.5)              | 0.656    |
| <b>Methotrimeprazine, n (%)</b>                                    | 37 (22.7)                                   | 40 (24.5)                    | 26 (30.6)                  | 0.389    |

|                                     |                                        |                                        |                                         |              |
|-------------------------------------|----------------------------------------|----------------------------------------|-----------------------------------------|--------------|
| <b>Mean 24-hour dose, mg‡</b>       | 10 (6.3-22.5)                          | 11.7 (6.9-24.4)                        | 11.3 (5.0-25.0)                         | 0.947        |
|                                     |                                        |                                        |                                         |              |
| <b>Benzodiazepines</b>              |                                        |                                        |                                         |              |
| <b>Lorazepam, n (%)</b>             | 19 (11.7)                              | 17 (10.4)                              | 7 (8.2)                                 | 0.705        |
| <b>Mean 24-hour dose, mg‡</b>       | <b>1.0 (0.5-1.5)</b>                   | <b>1.5 (1.0-2.3)</b>                   | <b>3.7 (1.5-25.0)</b>                   | <b>0.017</b> |
| <b>Midazolam, n (%)</b>             | 96 (58.9)                              | 100 (61.4)                             | 57 (67.1)                               | 0.454        |
| <b>Mean 24-hour dose, mg‡</b>       | 3.7 (1.5-12.5)                         | 3.0 (1.5-11.3)                         | 5.7 (2.0-19.0)                          | 0.255        |
| <b>Maximum 24-hour dose, mg‡</b>    | 4.3 (2.0-13.5)                         | 4.0 (1.7-13.0)                         | 7.0 (2.0-22.0)                          | 0.199        |
|                                     |                                        |                                        |                                         |              |
| <b>Other sedating medications</b>   |                                        |                                        |                                         |              |
| <b>Phenobarbitone, n (%)</b>        | 4 (2.5)                                | 6 (3.7)                                | 5 (5.9)                                 | 0.393        |
| <b>Mean 24-hour dose, mg‡</b>       | 150.0 (90.0-210.0)                     | 127.5 (90.0-140.0)                     | 150.0 (75.0-180)                        | 0.811        |
| <b>Propofol administered, n (%)</b> | 21 (12.9)                              | 28 (17.2)                              | 13 (15.3)                               | 0.555        |
| <b>Mean 24-hour dose, mg‡</b>       | 1078.5<br>(692.5-1984.0)               | 1329.2<br>(634.0-2811.6)               | 1887.5<br>(1337.5-5527.3)               | 0.080        |
| <b>Maximum 24-hour dose, mg‡</b>    | <b>1444.8</b><br><b>(692.5-2207.0)</b> | <b>1624.4</b><br><b>(851.0-3491.5)</b> | <b>2665.6</b><br><b>(2119.4-6304.0)</b> | <b>0.033</b> |

\*Based on exposure to a minimum of at least one full inpatient 24-hour period for mean 24-hour dose determination within the last 72 hours of life.

†Data were excluded for 7 decedents in each of the original Pre-COVID and COVID-ve groups due to admission duration < 24 hours

‡Individual mean 24-hour doses are summarized for the study group as a median (interquartile range) value for each of the three study groups.

Although both mean and maximum 24-hour doses of midazolam were higher in the COVID+ve group, the differences were not statistically different. The median lorazepam COVID+ve group dose, 3.7 (1.5-25.0) was higher than that of the Pre-COVID and COVID-ve groups, 1.0 (0.5-1.5) and 1.5 (1.0-2.3), respectively ( $p=0.017$ ). Similarly, the median of the maximum propofol dose, 2665.6 (2119.4-6304.0) was higher than that of the Pre-COVID and COVID-ve groups, 1444.8 (692.5-2207.0) and 1624.4 (851.0-3491.5), respectively ( $p=0.033$ ).

## DISCUSSION

### *Study findings and putative explanations*

Our study found that COVID+ve decedents received significantly higher opioid doses than matched pre-pandemic or intra-pandemic control patients. This finding was moderately robust: it was consistent in each 24-hour time period within the last 72 hours of life, and further bolstered by finding that dying of COVID-19 was independently associated (aOR=2.6) with a parenteral MEDD  $\geq 30$ mg in the last 24 hours of life. COVID+ve decedents had significantly higher maximum 24-hour propofol use in ICU compared to control group decedents. Also, higher lorazepam and midazolam doses were used in the COVID+ve group than either of the other groups; the difference was only statistically significant in relation to lorazepam. Collectively, these findings regarding opioid and sedative use support our study hypothesis that the requirement for these medications is higher in hospitalized patients dying of COVID-19 infection. In subgroup analyses, COVID+ve ICU decedents had significantly higher opioid use than ICU decedents in either of the control groups, which was evident in the last 24 hours (T1) and over the last 72 hours of life, suggesting that dying in ICU with COVID-19 infection is particularly associated with increased opioid and propofol requirements. These findings warrant a symptom profile evaluation of those dying of COVID-19.

Although our study patients' comfort in the last 72 hours of life was regularly assessed and documented, there was no formal standardized recording of symptom intensity across sites. For symptom profile comparisons we used the admission documentation of symptoms, which fell within the last 72 hours of life for approximately 20% of the study sample. The COVID +ve group had significantly higher admission prevalence of breathlessness, cough, and fever, and used high-flow nasal cannula oxygen support more frequently during admission. Previous studies have found that breathlessness is a major symptom in patients dying with COVID-19 infection.(15,16,31,38-40) Although myalgic pain is reported in those dying of COVID-19 infection,(15) among our three study groups, pain was least frequent in COVID+ve decedents at admission, but higher prevalence could have occurred closer to death. High-flow nasal cannula use was independently associated (aOR=1.9) with a parenteral MEDD  $\geq 30$ mg in the last 24 hours of life. Collectively, our results suggest that respiratory distress mediated higher opioid use in the COVID+ve group, particularly in ICU decedents. Agitation and delirium are reported in patients dying of COVID-19 infection.(14,18,31,33,40) Although the admission prevalence of agitation was largely similar across our groups, subsequent group differences in agitation level could have arisen nearer to death. Furthermore, COVID+ve group

1  
2  
3 decedents had a higher admission prevalence of dementia and other comorbidity burden, both risk factors for  
4 delirium.(41) The higher lorazepam and maximum 24-hour propofol doses in our COVID+ve group were possibly  
5 due to COVID-19 related respiratory distress in addition to potential contributions of cognitive dysfunction with  
6 agitation, and greater comorbidity-related distress.  
7  
8  
9  
10

11  
12         Logistical issues associated with the COVID-19 pandemic, particularly the increased healthcare demands  
13 that stretched acute care services to and often beyond their limits, also warrant consideration in interpreting our  
14 study findings. Fewer COVID+ve group decedents (16.5%) were intubated compared to Pre-COVID (26.5%) or  
15 COVID-ve (25.3%) decedents, raising the possibility that greater emphasis was placed on the medication  
16 management of dyspnoea with opioids and sedatives for some patients rather than mechanical ventilation per se.  
17  
18 It is also possible that more rigorous and prompt assessment of those dying of COVID-19 could have been impeded  
19 to some extent by isolation requirements and the need for staff to don burdensome personal protective  
20 equipment; this could have resulted in greater reliance on opioids and sedatives for symptom management.  
21  
22  
23  
24  
25  
26  
27

#### 28 *Study findings in the context of published data*

29  
30 Although atrial fibrillation is a risk factor for mortality in high-risk COVID-19 patients,(42) it was least prevalent in  
31 our COVID+ve study group. Meanwhile, the higher COVID+ve group admission prevalence of cognitive impairment  
32 and other comorbidities were largely consistent with published data on COVID-19 risk factors.(11,17) Similarly, the  
33 higher prevalence of respiratory symptoms and fever is consistent with reported end-of-life prevalence in COVID-  
34 19 deaths.(12,14,17) Literature comparison of palliative medication use in patients dying due to COVID-19  
35 infection is limited by paucity of data, particularly on ICU deaths, and further compromised by differences in type  
36 of aggregate dose measures reported, time reference, care setting, regional medication formularies, and in the  
37 separate reporting of pro re nata (PRN) or “as needed” medication use in addition to continuous infusional  
38 use.(28) We reported the total daily medication use which included regularly scheduled and PRN doses, or solely  
39 PRN doses in the absence of scheduled dosing. Although antisecretory and antipsychotic medication use was  
40 similar across all of our study groups, and comparable to published estimates in COVID-19 deaths,(28,30,31) our  
41 findings regarding opioid and benzodiazepine use warrant more detailed evaluation in the context of published  
42 data.  
43  
44  
45  
46  
47  
48  
49  
50  
51  
52  
53  
54  
55  
56  
57  
58  
59  
60

1  
2  
3 A systematic review of symptom management in COVID-19 related deaths, which excluded ICU  
4 deaths,(28) concluded that although a higher proportion of those dying with COVID-19 infection required  
5 continuous administration of opioid or midazolam than previously reported in pre-COVID-19 palliative care, doses  
6 were relatively low (median of 10-15 mg of parenteral morphine, and 10mg of midazolam, in the last 24 hours of  
7 life, in an aggregate dose summary of 5 of the studies) and in keeping with published guidelines.(24) A study of  
8 COVID-19 deaths in a hospital palliative care unit in New York reported a median parenteral MEDD (range) of 48  
9 (24-144) mg in the last days of life.(33) A Belgian study of hospitalized COVID-19 decedents, excluded ICU deaths,  
10 and reported a mean parenteral MEDD of 31.3 (range, 2-120) mg, and mean midazolam dose of 20.4 (range, 1-  
11 100) mg in the last 24 hours of life.(32) An Australian study of hospitalized COVID-19 decedents, including 9 (4%)  
12 who died in ICU, reported a median (Q1-Q3) oral MEDD of 45 (22.5-75.0) in the last day before death.(31) Our  
13 study's higher MEDD findings in the COVID+ve group were comparable to this study; the inclusion of ICU  
14 decedents with possibly higher levels of symptom distress in our study could explain the higher opioid and sedative  
15 doses than those reported in the systematic review by Heath et al.(28) The progressive MEDD increase in the  
16 COVID+ve group over the last 72 hours is consistent with a longitudinal study reporting a doubling of median daily  
17 opioid use in the last 7 days of life in COVID-19 decedents.(31) Our finding of an independent association between  
18 male sex and higher opioid dosing is difficult to explain, as larger pre-pandemic studies have not reported a sex  
19 difference in relation to opioid dosing.(43,44) Although male sex is a recognized mortality-related risk factor in  
20 COVID-19 infection,(11,45) a statistically significant interaction between sex and study group status was not  
21 detected in the model.

22  
23 Although 67.1% of the COVID+ve group received midazolam in the last 72 hours of life, the daily  
24 midazolam dose estimates in this period were lower than the 10 mg estimate reported in a systematic review.(28)  
25  
26 Although palliative care involvement was similar across our study groups, the completion of a consult in only  
27 29.4% of the COVID+ve group is below the 39-51% range reported in other studies of COVID-19 decedents,(3,31)  
28 and possibly impacted the prescribing patterns of some medications used for end-of-life symptom control.

### 29 *Study implications and future research*

30  
31 In addition to informing end-of-life guidelines on medication use for symptom management in COVID-19 infection  
32 and in future pandemics, our study findings warrant further research, particularly regarding the use of opioids and

1  
2  
3 sedatives in the ICU setting. Moreover, regarding end-of-life comfort assessment, our study highlights the need for  
4 standardized symptom assessment measures such as the palliative version of the Richmond Agitation-Sedation  
5 Scale (RASS-PAL),(46) which can be used to evaluate medication efficacy and audit quality of care. Specialist  
6  
7  
8  
9 palliative care involvement in end-of-life care of hospitalized individuals warrants further study both in relation to  
10  
11  
12 predictors and outcomes.

### 13 *Study strengths and limitations*

14  
15 Our study's decedent cohort was representative of the source population in all adult acute care hospitals in a large  
16 urban region; using matched control groups from within and prior to the COVID-19 pandemic facilitated valid and  
17  
18 unique comparisons, which generated some robust findings, particularly regarding opioid use. The retrospective  
19  
20 design and use of admission symptom assessment and comorbidity data without similar data, including medication  
21  
22 efficacy and side-effects, from within the more immediate end-of-life period are obvious limitations. The role of  
23  
24 non-pharmacological interventions was not examined. Although rigorous training and accuracy checks were  
25  
26 conducted regarding data abstraction, misclassification bias cannot be excluded, and absence of abstractor  
27  
28 blinding to the study hypothesis is a potential source of bias. This study was performed during Wave 1 of the  
29  
30 pandemic, and both symptom burden and medication requirements for symptom control could have changed to  
31  
32 some extent with subsequent waves. The generalizability of our study findings is largely limited to end-of-life care  
33  
34 for hospitalized decedents, whereas many of the COVID-19 pandemic related deaths in Wave 1 of the pandemic  
35  
36 occurred in nursing homes.  
37  
38  
39  
40  
41

### 42 **CONCLUSIONS**

43  
44 Overall, our study evidence suggests that in addition to the association of male sex with higher end-of-life opioid  
45 requirements, patients dying of COVID-19 infection required higher daily opioid and lorazepam doses than those  
46  
47 dying of other causes both before and during the COVID-19 pandemic. Furthermore, patients who died of COVID-  
48  
49 19 infection in ICU required higher maximum 24-hour propofol doses than those who died in ICU without COVID-  
50  
51 19 infection. Increased breathlessness and agitation due to COVID-19 and higher underlying comorbidity levels  
52  
53 may require higher doses of opioids and sedatives for symptom control. These findings warrant consideration in  
54  
55  
56  
57  
58  
59  
60

1  
2  
3 the context of managing ongoing life threatening COVID-19 infection and in anticipatory preparation for future  
4  
5 respiratory virus pandemics.  
6  
7  
8  
9  
10  
11  
12  
13  
14  
15  
16  
17  
18  
19  
20  
21  
22  
23  
24  
25  
26  
27  
28  
29  
30  
31  
32  
33  
34  
35  
36  
37  
38  
39  
40  
41  
42  
43  
44  
45  
46  
47  
48  
49

For peer review only

50 **Figure 1 Median MEDD for consecutive 24-hour periods (T3-T1) within the last 72 hours of life**

51  
52  
53  
54  
55 **Data availability statement**  
56  
57  
58  
59  
60

1  
2  
3 No additional data available  
4

5  
6 **Ethics statements**  
7

8 **Patient consent for publication**  
9

10  
11 Not applicable.  
12

13  
14 **Ethics approval**  
15

16 Each hospital's Research Ethics Board (REB) approved the study: Ottawa Health Science Network-REB (20200653-  
17 01H, December 18th 2020); Montfort REB (20-21-10-032, December 2nd 2020) and Queensway Carleton Hospital  
18 REB (20-06, December 1st 2020).  
19  
20  
21  
22

23 **Acknowledgements**  
24

25  
26 The authors are grateful to Dong Vo, Ottawa Methods Centre's Data Management Services and Ottawa Hospital  
27 Research Institute for the creation of an electronic study database. We gratefully acknowledge the input of  
28 representatives from Bereaved Families of Ontario, Canadian Virtual Hospice and the Champlain Hospice Palliative  
29 Care Program. PGL, LC, VG, RM, GW, AB, PE, SHB, PT, and JD receive Academic Protected Time Awards from the  
30 Department of Medicine, University of Ottawa, Ottawa, Canada.  
31  
32  
33  
34  
35  
36

37 **Contributors**  
38

39 JD conceptualized the project and designed the study with assistance from PL, HP, LC, VG, RM, GW, AB, KW, JL,  
40 CW, DB, PE, ID, KB, CD, AI, SHB, SI, PT, BV. The study site leads, HP, VG, LC, co-ordinated ethics applications along  
41 with PL, JL and DB. Data were abstracted by PL, HP, SRA, EB, LC, RM, GW, AB, KAM, KW, PE, ID, KB and CD. Data  
42 verification was coordinated by PL with the assistance of HP, SRA, EB, LC, RM, GW, AB, PE and KB. Statistical  
43 analyses were performed by PL with support from LC and CW. All authors, including MK, CN, BH and KA assisted  
44 with data interpretation. The original version of the manuscript was drafted by PL and LC and critically reviewed by  
45 all authors. All authors approved the final manuscript as submitted.  
46  
47  
48  
49  
50  
51  
52

53 **Funding**  
54  
55  
56  
57  
58  
59  
60



1  
2  
3 This work has been funded in part by a grant from the University of Ottawa Faculty of Medicine COVID-19  
4  
5 Pandemic Response Funding Program, and in part by a contribution from Health Canada, Health Care Policy and  
6  
7 Strategies Program. The views expressed herein do not necessarily represent the views of Health Canada nor the  
8  
9 University of Ottawa.  
10

### 11 12 13 **Competing interests**

14  
15 The authors declare no potential conflicts of interest with respect to the research, authorship, and/or publication  
16  
17 of this article.  
18

### 19 **REFERENCES**

- 20  
21  
22 1. World Health Organisation. 2023 [Available from: [https://www.who.int/publications/m/item/weekly-](https://www.who.int/publications/m/item/weekly-epidemiological-update-on-covid-19---25-january-2023)  
23  
24 epidemiological-update-on-covid-19---25-january-2023 accessed January 29 2023.  
25  
26 2. COVID-19 Excess Mortality Collaborators. Estimating excess mortality due to the COVID-19 pandemic: a  
27  
28 systematic analysis of COVID-19-related mortality, 2020-21. *Lancet (London, England)*  
29  
30 2022;399(10334):1513-36. doi: 10.1016/s0140-6736(21)02796-3 [published Online First: 2022/03/14]  
31  
32 3. Duffy T, Seaton RA, McKeown A, et al. Hospital Specialist Palliative Care Team Influence on End-of-Life Care in  
33  
34 Coronavirus Disease 2019? A Retrospective Observational Cohort Study. *Palliat Med Rep* 2022;3(1):235-  
35  
36 43. doi: 10.1089/pmr.2022.0041 [published Online First: 2022/11/08]  
37  
38 4. Wentlandt K, Wolofsky KT, Weiss A, et al. Identifying barriers and facilitators to palliative care integration in the  
39  
40 management of hospitalized patients with COVID-19: A qualitative study. *Palliative Medicine*  
41  
42 2022;36(6):945-54. doi: 10.1177/02692163221087162 [published Online First: 2022/04/21]  
43  
44 5. Arya A, Buchman S, Gagnon B, et al. Pandemic palliative care: beyond ventilators and saving lives. *CMAJ* :  
45  
46 *Canadian Medical Association Journal* 2020;192(15):E400-e04. doi: 10.1503/cmaj.200465 [published  
47  
48 Online First: 2020/04/03]  
49  
50 6. Mottiar M, Hendin A, Fischer L, et al. End-of-life care in patients with a highly transmissible respiratory virus:  
51  
52 implications for COVID-19. *Canadian Journal of Anaesthesia* 2020;67(10):1417-23. doi: 10.1007/s12630-  
53  
54 020-01699-0 [published Online First: 2020/05/13]  
55  
56  
57  
58  
59  
60

- 1  
2  
3 7. Ting R, Edmonds P, Higginson IJ, et al. Palliative care for patients with severe covid-19. *BMJ (Clinical research ed)*  
4  
5 2020;370:m2710. doi: 10.1136/bmj.m2710 [published Online First: 2020/07/16]  
6
- 7 8. Muhsen K, Maimon N, Mizrahi AY, et al. Association of BNT162b2 Vaccine Third Dose Receipt With Incidence of  
8  
9 SARS-CoV-2 Infection, COVID-19-Related Hospitalization, and Death Among Residents of Long-term Care  
10  
11 Facilities, August to October 2021. *JAMA Netw Open* 2022;5(7):e2219940. doi:  
12  
13 10.1001/jamanetworkopen.2022.19940 [published Online First: 2022/07/08]  
14
- 15 9. Agrawal U, Bedston S, McCowan C, et al. Severe COVID-19 outcomes after full vaccination of primary schedule  
16  
17 and initial boosters: pooled analysis of national prospective cohort studies of 30 million individuals in  
18  
19 England, Northern Ireland, Scotland, and Wales. *Lancet (London, England)* 2022;400(10360):1305-20. doi:  
20  
21 10.1016/s0140-6736(22)01656-7 [published Online First: 2022/10/17]  
22
- 23 10. Hippisley-Cox J, Coupland CA, Mehta N, et al. Risk prediction of covid-19 related death and hospital admission  
24  
25 in adults after covid-19 vaccination: national prospective cohort study. *BMJ (Clinical research ed)*  
26  
27 2021;374:n2244. doi: 10.1136/bmj.n2244 [published Online First: 2021/09/19]  
28
- 29 11. Docherty AB, Harrison EM, Green CA, et al. Features of 20 133 UK patients in hospital with covid-19 using the  
30  
31 ISARIC WHO Clinical Characterisation Protocol: prospective observational cohort study. *BMJ (Clinical*  
32  
33 *research ed)* 2020;369:m1985. doi: 10.1136/bmj.m1985 [published Online First: 2020/05/24]  
34
- 35 12. Murthy S, Archambault PM, Atique A, et al. Characteristics and outcomes of patients with COVID-19 admitted  
36  
37 to hospital and intensive care in the first phase of the pandemic in Canada: a national cohort study. *CMAJ*  
38  
39 *Open* 2021;9(1):E181-e88. doi: 10.9778/cmajo.20200250 [published Online First: 2021/03/11]  
40
- 41 13. Petrilli CM, Jones SA, Yang J, et al. Factors associated with hospital admission and critical illness among 5279  
42  
43 people with coronavirus disease 2019 in New York City: prospective cohort study. *BMJ (Clinical research*  
44  
45 *ed)* 2020;369:m1966. doi: 10.1136/bmj.m1966 [published Online First: 2020/05/24]  
46
- 47 14. Hetherington L, Johnston B, Kotronoulas G, et al. COVID-19 and Hospital Palliative Care - A service evaluation  
48  
49 exploring the symptoms and outcomes of 186 patients and the impact of the pandemic on specialist  
50  
51 Hospital Palliative Care. *Palliative Medicine* 2020;34(9):1256-62. doi: 10.1177/0269216320949786  
52  
53 [published Online First: 2020/08/15]  
54  
55  
56  
57  
58  
59

- 1  
2  
3 15. Keeley P, Buchanan D, Carolan C, et al. Symptom burden and clinical profile of COVID-19 deaths: a rapid  
4  
5 systematic review and evidence summary. *BMJ Supportive & Palliative Care* 2020;10(4):381-84. doi:  
6  
7 10.1136/bmjspcare-2020-002368 [published Online First: 2020/05/30]  
8  
9  
10 16. Martinsson L, Bergström J, Hedman C, et al. Symptoms, symptom relief and support in COVID-19 patients dying  
11  
12 in hospitals during the first pandemic wave. *BMC Palliative Care* 2021;20(1):102. doi: 10.1186/s12904-  
13  
14 021-00785-4 [published Online First: 2021/07/03]  
15  
16 17. Huang C, Wang Y, Li X, et al. Clinical features of patients infected with 2019 novel coronavirus in Wuhan, China.  
17  
18 *Lancet (London, England)* 2020;395(10223):497-506. doi: 10.1016/s0140-6736(20)30183-5 [published  
19  
20 Online First: 2020/01/28]  
21  
22 18. Garcez FB, Aliberti MJR, Poco PCE, et al. Delirium and Adverse Outcomes in Hospitalized Patients with COVID-  
23  
24 19. *Journal of the American Geriatrics Society* 2020;68(11):2440-46. doi: 10.1111/jgs.16803 [published  
25  
26 Online First: 2020/08/25]  
27  
28 19. Etkind SN, Bone AE, Lovell N, et al. The Role and Response of Palliative Care and Hospice Services in Epidemics  
29  
30 and Pandemics: A Rapid Review to Inform Practice During the COVID-19 Pandemic. *Journal of Pain and*  
31  
32 *Symptom Management* 2020;60(1):e31-e40. doi: 10.1016/j.jpainsymman.2020.03.029 [published Online  
33  
34 First: 2020/04/12]  
35  
36 20. Oluyase AO, Bajwah S, Sleeman KE, et al. Symptom management in people dying with COVID-19: multinational  
37  
38 observational study. *BMJ Supportive & Palliative Care* 2022;12(4):439-47. doi: 10.1136/spcare-2022-  
39  
40 003799 [published Online First: 2022/11/24]  
41  
42 21. Bowman BA, Back AL, Esch AE, et al. Crisis Symptom Management and Patient Communication Protocols Are  
43  
44 Important Tools for All Clinicians Responding to COVID-19. *Journal of Pain and Symptom Management*  
45  
46 2020;60(2):e98-e100. doi: 10.1016/j.jpainsymman.2020.03.028 [published Online First: 2020/04/11]  
47  
48 22. deLima Thomas J, Leiter RE, Abrahm JL, et al. Development of a Palliative Care Toolkit for the COVID-19  
49  
50 Pandemic. *Journal of Pain and Symptom Management* 2020;60(2):e22-e25. doi:  
51  
52 10.1016/j.jpainsymman.2020.05.021 [published Online First: 2020/05/27]  
53  
54  
55  
56  
57  
58  
59  
60

- 1  
2  
3 23. Cheyne S, Lindley RI, Smallwood N, et al. Care of older people and people requiring palliative care with COVID-  
4  
5 19: guidance from the Australian National COVID-19 Clinical Evidence Taskforce. *The Medical journal of*  
6  
7 *Australia* 2022;216(4):203-08. doi: 10.5694/mja2.51353 [published Online First: 2021/12/06]  
8  
9  
10 24. National Institute for Health and Care Excellence (NICE). Managing COVID-19 symptoms (including at the end of  
11  
12 life) in the community: summary of NICE guidelines. *BMJ (Clinical research ed)* 2020;369:m1461. doi:  
13  
14 10.1136/bmj.m1461 [published Online First: 2020/04/22]  
15  
16 25. Luz M, Brandão Barreto B, de Castro REV, et al. Practices in sedation, analgesia, mobilization, delirium, and  
17  
18 sleep deprivation in adult intensive care units (SAMDS-ICU): an international survey before and during the  
19  
20 COVID-19 pandemic. *Ann Intensive Care* 2022;12(1):9. doi: 10.1186/s13613-022-00985-y [published  
21  
22 Online First: 2022/02/06]  
23  
24 26. Sim J, Goh WY, Wiryasaputra L, et al. Use of Phenobarbitone for Palliative Sedation in Dyspneic Crises Due to  
25  
26 COVID-19 Pneumonia - A Case Series. *Journal of Pain & Palliative Care Pharmacotherapy* 2022;36(4):242-  
27  
28 48. doi: 10.1080/15360288.2022.2113596 [published Online First: 2022/08/26]  
29  
30 27. Andreas M, Piechotta V, Skoetz N, et al. Interventions for palliative symptom control in COVID-19 patients. *The*  
31  
32 *Cochrane Database of Systematic Reviews* 2021;8(8):Cd015061. doi: 10.1002/14651858.Cd015061  
33  
34 [published Online First: 2021/08/24]  
35  
36 28. Heath L, Carey M, Lowney AC, et al. Pharmacological strategies used to manage symptoms of patients dying of  
37  
38 COVID-19: A rapid systematic review. *Palliative Medicine* 2021;35(6):1099-107. doi:  
39  
40 10.1177/02692163211013255 [published Online First: 2021/05/14]  
41  
42 29. Barnes H, McDonald J, Smallwood N, et al. Opioids for the palliation of refractory breathlessness in adults with  
43  
44 advanced disease and terminal illness. *The Cochrane Database of Systematic Reviews* 2016;3:Cd011008.  
45  
46 doi: 10.1002/14651858.CD011008.pub2 [published Online First: 2016/04/01]  
47  
48 30. Jackson T, Hobson K, Clare H, et al. End-of-life care in COVID-19: An audit of pharmacological management in  
49  
50 hospital inpatients. *Palliative Medicine* 2020;34(9):1235-40. doi: 10.1177/0269216320935361 [published  
51  
52 Online First: 2020/06/27]  
53  
54  
55  
56  
57  
58  
59  
60

- 1  
2  
3 31. Wong AK, Philip J, Wawryk O, et al. A Multi-Centre COVID-19 Study Examining Symptoms and Medication Use  
4 in the Final Week of Life. *Journal of Pain and Symptom Management* 2022;64(3):e139-e47. doi:  
5 10.1016/j.jpainsymman.2022.05.013 [published Online First: 2022/06/02]  
6  
7  
8  
9 32. Janssens WH, Van Den Noortgate NJ, Piers RD. Terminal care in oldest old dying from COVID-19 in the acute  
10 hospital : A multicenter study describing pharmacological treatment in the last 24 h. *Zeitschrift fur*  
11 *Gerontologie und Geriatrie* 2022;55(2):129-34. doi: 10.1007/s00391-022-02036-4 [published Online First:  
12 2022/03/05]  
13  
14  
15  
16  
17 33. Sun H, Lee J, Meyer BJ, et al. Characteristics and Palliative Care Needs of COVID-19 Patients Receiving Comfort-  
18 Directed Care. *Journal of the American Geriatrics Society* 2020;68(6):1162-64. doi: 10.1111/jgs.16507  
19 [published Online First: 2020/04/25]  
20  
21  
22  
23 34. Downar J, Parsons HA, Cohen L, et al. Bereavement outcomes in family members of those who died in acute  
24 care hospitals before and during the first wave of COVID-19: A cohort study. *Palliative Medicine*  
25 2022;36(8):1305-12. doi: 10.1177/02692163221109711 [published Online First: 2022/07/06]  
26  
27  
28  
29 35. Lawlor P, Parsons H, Adeli SR, et al. Comparative end-of-life communication and support in hospitalised  
30 decedents before and during the COVID-19 pandemic: a retrospective regional cohort study in Ottawa,  
31 Canada. *BMJ Open* 2022;12(6):e062937. doi: 10.1136/bmjopen-2022-062937 [published Online First:  
32 2022/06/28]  
33  
34  
35  
36  
37 36. von Elm E, Altman DG, Egger M, et al. The Strengthening the Reporting of Observational Studies in  
38 Epidemiology (STROBE) statement: guidelines for reporting observational studies. *PLoS Medicine*  
39 2007;4(10):e296. doi: 10.1371/journal.pmed.0040296 [published Online First: 2007/10/19]  
40  
41  
42  
43 37. Pereira J, Lawlor P, Vigano A, et al. Equianalgesic dose ratios for opioids. a critical review and proposals for  
44 long-term dosing. *Journal of Pain and Symptom Management* 2001;22(2):672-87. [published Online First:  
45 2001/08/10]  
46  
47  
48  
49 38. Alderman B, Webber K, Davies A. An audit of end-of-life symptom control in patients with corona virus disease  
50 2019 (COVID-19) dying in a hospital in the United Kingdom. *Palliative Medicine* 2020;34(9):1249-55. doi:  
51 10.1177/0269216320947312 [published Online First: 2020/08/02]  
52  
53  
54  
55  
56  
57  
58  
59  
60

- 1  
2  
3 39. Chidiac C, Feuer D, Flatley M, et al. The need for early referral to palliative care especially for Black, Asian and  
4  
5 minority ethnic groups in a COVID-19 pandemic: Findings from a service evaluation. *Palliative Medicine*  
6  
7 2020;34(9):1241-48. doi: 10.1177/0269216320946688 [published Online First: 2020/08/02]  
8  
9 40. Lovell N, Maddocks M, Etkind SN, et al. Characteristics, Symptom Management, and Outcomes of 101 Patients  
10  
11 With COVID-19 Referred for Hospital Palliative Care. *Journal of Pain and Symptom Management*  
12  
13 2020;60(1):e77-e81. doi: 10.1016/j.jpainsymman.2020.04.015 [published Online First: 2020/04/24]  
14  
15 41. Inouye SK, Westendorp RG, Saczynski JS. Delirium in elderly people. *Lancet (London, England)*  
16  
17 2014;383(9920):911-22. doi: 10.1016/s0140-6736(13)60688-1 [published Online First: 2013/09/03]  
18  
19 42. Zuin M, Rigatelli G, Bilato C, et al. Pre-existing atrial fibrillation is associated with increased mortality in COVID-  
20  
21 19 Patients. *J Interv Card Electrophysiol* 2021;62(2):231-38. doi: 10.1007/s10840-021-00992-2 [published  
22  
23 Online First: 2021/04/16]  
24  
25 43. Hall S, Gallagher RM, Gracely E, et al. The terminal cancer patient: effects of age, gender, and primary tumor  
26  
27 site on opioid dose. *Pain Medicine (Malden, Mass)* 2003;4(2):125-34. doi: 10.1046/j.1526-  
28  
29 4637.2003.03020.x [published Online First: 2003/07/23]  
30  
31 44. Yennurajalingam S, Lu Z, Reddy SK, et al. Patterns of Opioid Prescription, Use, and Costs Among Patients With  
32  
33 Advanced Cancer and Inpatient Palliative Care Between 2008 and 2014. *Journal of Oncology Practice*  
34  
35 2019;15(1):e74-e83. doi: 10.1200/jop.18.00205 [published Online First: 2018/11/30]  
36  
37 45. Dessie ZG, Zewotir T. Mortality-related risk factors of COVID-19: a systematic review and meta-analysis of 42  
38  
39 studies and 423,117 patients. *BMC Infectious Diseases* 2021;21(1):855. doi: 10.1186/s12879-021-06536-3  
40  
41 [published Online First: 2021/08/23]  
42  
43 46. Bush SH, Grassau PA, Yarmo MN, et al. The Richmond Agitation-Sedation Scale modified for palliative care  
44  
45 inpatients (RASS-PAL): a pilot study exploring validity and feasibility in clinical practice. *BMC Palliative*  
46  
47 *Care* 2014;13(1):17. doi: 10.1186/1472-684x-13-17 [published Online First: 2014/04/02]  
48  
49  
50  
51  
52  
53  
54  
55  
56  
57  
58  
59

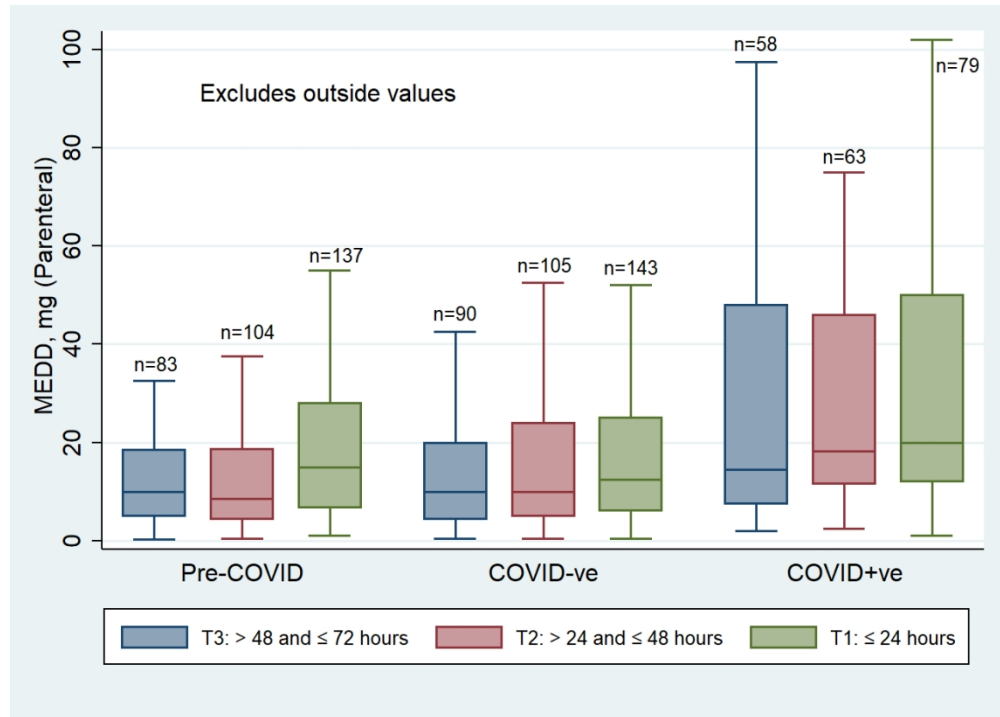

Figure 1 Median MEDD for consecutive 24-hour periods (T3-T1) within the last 72 hours of life

461x329mm (72 x 72 DPI)

**Appendix 1 Clinical characteristics as documented at admission, and supportive interventions as documented during admission**

| <b>Comorbidities at admission</b>  |
|------------------------------------|
| COPD                               |
| Asthma                             |
| Heart Failure                      |
| Hypertension                       |
| Atrial fibrillation                |
| Coronary artery disease            |
| Chronic liver disease              |
| Diabetes mellitus                  |
| Chronic kidney disease             |
| Obesity                            |
| HIV infection                      |
| Dementia                           |
| Active cancer                      |
| Other comorbidity                  |
|                                    |
| <b>Symptoms/signs at admission</b> |



|                                                              |
|--------------------------------------------------------------|
| Breathlessness                                               |
| Airway secretions                                            |
| Cough                                                        |
| Agitation                                                    |
| Drowsiness                                                   |
| Pain                                                         |
| Cognitive impairment                                         |
| Fatigue                                                      |
| Fever                                                        |
| Other symptoms                                               |
|                                                              |
| <b>Respiratory/circulatory support used during admission</b> |
| BIPAP                                                        |
| High flow nasal cannula                                      |
| Intubated                                                    |
| Other respiratory support                                    |
| Vasopressor use                                              |

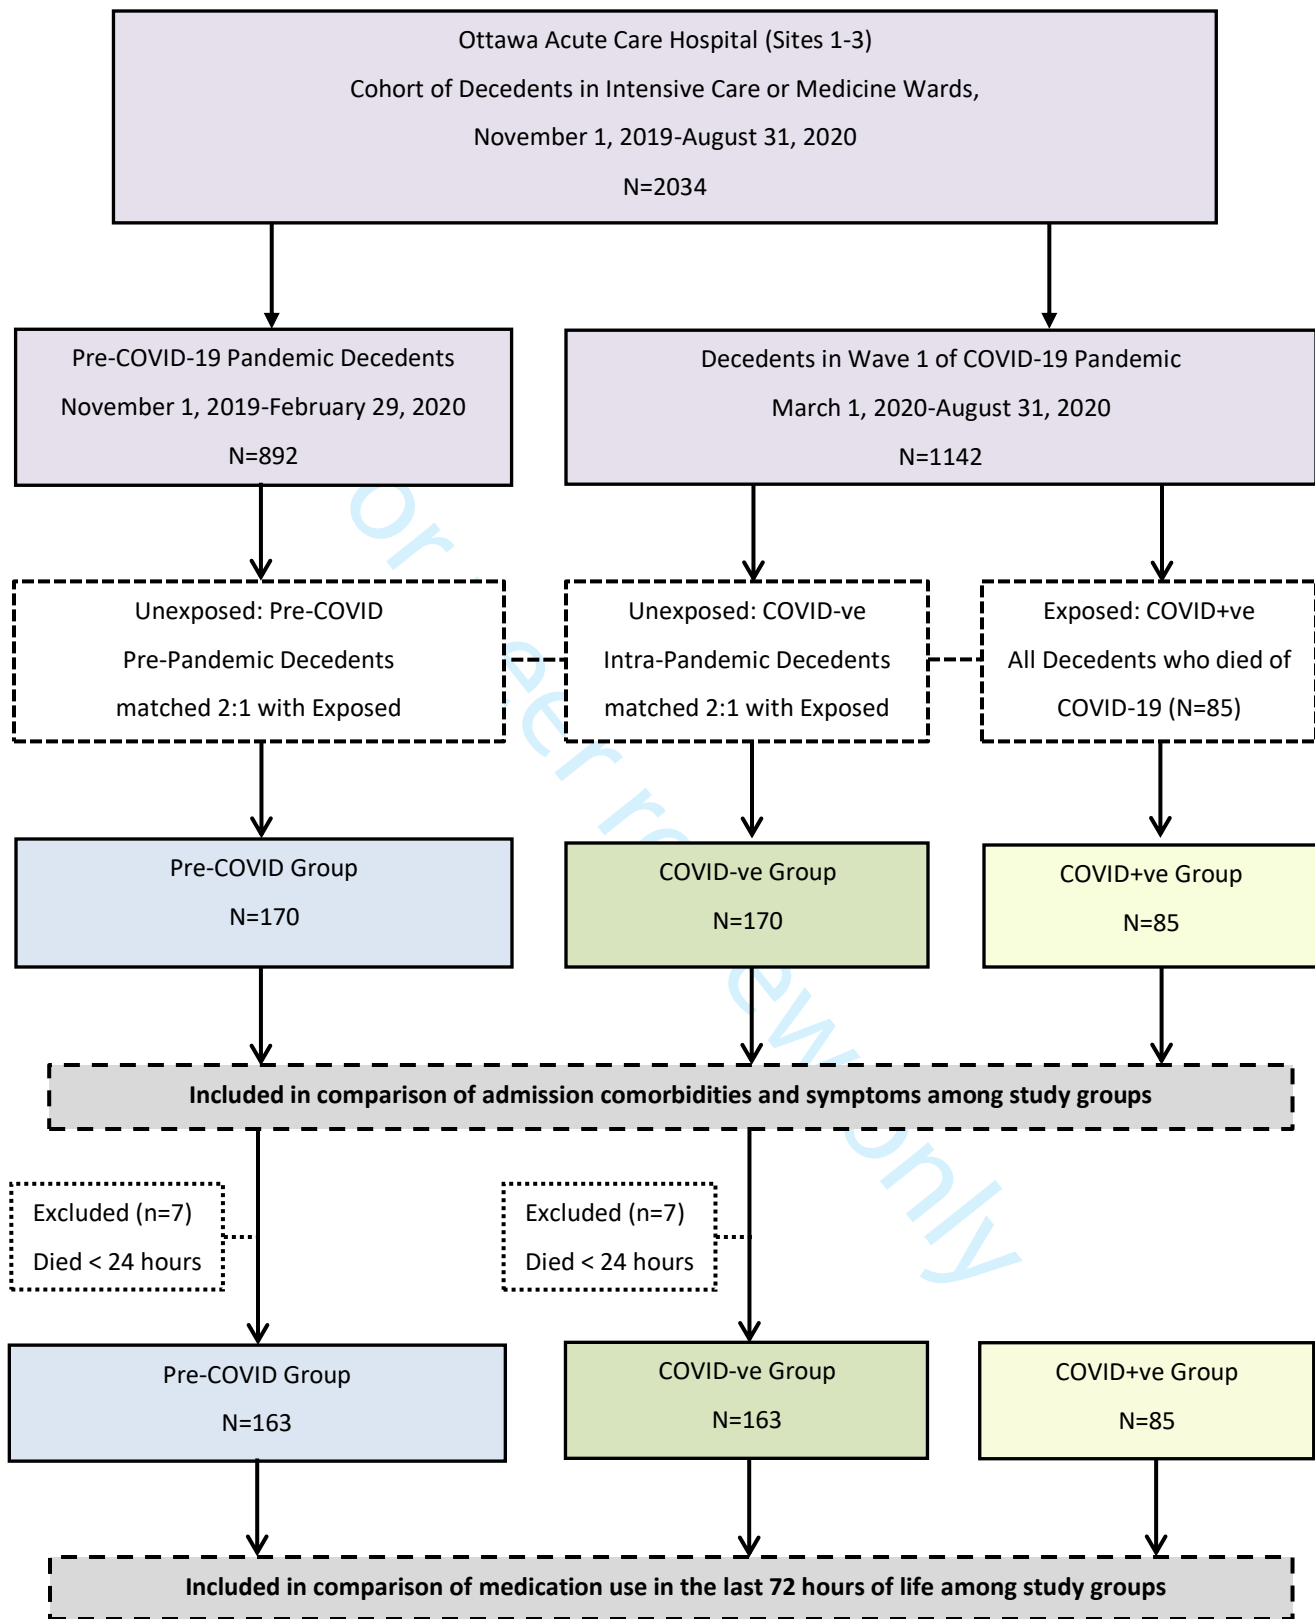

Appendix 2 Supplemental Figure Study Flow Diagram with Study Group Derivation for Comparative Outcomes

**Appendix 3 Supplemental Table Study group comparison of admission clinical characteristics and respiratory/circulatory support use during admission**

| Clinical characteristics           | Time periods and designated study groups |                              |                            | P values         |
|------------------------------------|------------------------------------------|------------------------------|----------------------------|------------------|
|                                    | Nov 2019-Feb 2020                        | Mar 2020 – Aug 2020 (Wave 1) |                            |                  |
|                                    | Pre-COVID Group<br>N=170 (%)             | COVID-ve Group<br>N=170 (%)  | COVID+ve Group<br>N=85 (%) |                  |
| <b>Comorbidities at admission</b>  |                                          |                              |                            |                  |
| <b>COPD</b>                        | 43 (25.3)                                | 49 (28.8)                    | 17 (20.0)                  | 0.312            |
| <b>Asthma</b>                      | 7 (4.1)                                  | 9 (5.3)                      | 3 (3.5)                    | 0.780            |
| <b>Heart Failure</b>               | 40 (23.5)                                | 48 (28.2)                    | 16 (18.8)                  | 0.240            |
| <b>Hypertension</b>                | 95 (55.9)                                | 104 (61.2)                   | 57 (67.1)                  | 0.217            |
| <b>Atrial fibrillation</b>         | <b>45 (26.5)</b>                         | <b>55 (32.4)</b>             | <b>13 (15.3)</b>           | <b>0.015</b>     |
| <b>Coronary artery disease</b>     | 52 (30.6)                                | 52 (30.6)                    | 22 (25.9)                  | 0.697            |
| <b>Chronic liver disease</b>       | 3 (1.8)                                  | 11 (6.5)                     | 3 (3.5)                    | 0.084            |
| <b>Diabetes mellitus</b>           | 48 (28.2)                                | 56 (32.9)                    | 26 (30.6)                  | 0.642            |
| <b>Chronic kidney disease</b>      | 32 (18.8)                                | 38 (22.4)                    | 19 (22.4)                  | 0.681            |
| <b>Obesity</b>                     | 6 (3.5)                                  | 15 (8.8)                     | 4 (4.7)                    | 0.102            |
| <b>HIV infection</b>               | 0 (0.0)                                  | 0 (0.0)                      | 1 (1.2)                    | 0.135            |
| <b>Dementia</b>                    | <b>47 (27.7)</b>                         | <b>44 (25.9)</b>             | <b>35 (41.2)</b>           | <b>0.032</b>     |
| <b>Active cancer</b>               | 44 (25.9)                                | 37 (21.8)                    | 11 (12.9)                  | 0.061            |
| <b>Other comorbidity</b>           | <b>108 (63.5)</b>                        | <b>102 (60.0)</b>            | <b>66 (77.7)</b>           | <b>0.018</b>     |
|                                    |                                          |                              |                            |                  |
| <b>Symptoms/signs at admission</b> |                                          |                              |                            |                  |
| <b>Breathlessness</b>              | <b>72 (42.4)</b>                         | <b>80 (47.1)</b>             | <b>54 (63.5)</b>           | <b>0.006</b>     |
| <b>Airway secretions</b>           | 28 (16.5)                                | 16 (9.4)                     | 7 (8.2)                    | 0.066            |
| <b>Cough</b>                       | <b>46 (27.1)</b>                         | <b>33 (19.4)</b>             | <b>34 (40.0)</b>           | <b>0.002</b>     |
| <b>Agitation</b>                   | 11 (6.5)                                 | 14 (8.2)                     | 10 (11.8)                  | 0.350            |
| <b>Drowsiness</b>                  | 68 (40.0)                                | 57 (33.5)                    | 39 (45.9)                  | 0.143            |
| <b>Pain</b>                        | <b>50 (29.4)</b>                         | <b>49 (28.8)</b>             | <b>9 (10.6)</b>            | <b>0.002</b>     |
| <b>Cognitive impairment</b>        | 57 (33.5)                                | 59 (34.7)                    | 35 (41.2)                  | 0.465            |
| <b>Fatigue</b>                     | 88 (51.8)                                | 83 (48.8)                    | 51 (60.0)                  | 0.239            |
| <b>Fever</b>                       | <b>16 (9.4)</b>                          | <b>23 (13.5)</b>             | <b>46 (54.1)</b>           | <b>&lt;0.001</b> |
| <b>Other symptoms</b>              | 90 (52.9)                                | 79 (46.5)                    | 42 (49.4)                  | 0.490            |

|                                                              |                  |                  |                  |                  |
|--------------------------------------------------------------|------------------|------------------|------------------|------------------|
|                                                              |                  |                  |                  |                  |
| <b>Respiratory/circulatory support used during admission</b> |                  |                  |                  |                  |
| <b>BIPAP</b>                                                 | 22 (12.9)        | 17 (10.0)        | 4 (4.7)          | 0.121            |
| <b>High flow nasal cannula</b>                               | <b>63 (37.1)</b> | <b>49 (28.8)</b> | <b>46 (54.1)</b> | <b>&lt;0.001</b> |
| <b>Intubated</b>                                             | 45 (26.5)        | 43 (25.3)        | 14 (16.5)        | 0.186            |
| <b>Other respiratory support</b>                             | 50 (29.4)        | 52 (30.6)        | 31 (36.5)        | 0.502            |
| <b>Vasopressor use</b>                                       | 43 (25.3)        | 47 (27.7)        | 13 (15.3)        | 0.087            |

**STROBE 2007 (v4) Statement—Checklist of items that should be included in reports of *cohort studies***

| Section/Topic                | Item # | Recommendation                                                                                                                                                                       | Reported on page # |
|------------------------------|--------|--------------------------------------------------------------------------------------------------------------------------------------------------------------------------------------|--------------------|
| <b>Title and abstract</b>    | 1      | (a) Indicate the study's design with a commonly used term in the title or the abstract                                                                                               | 6                  |
|                              |        | (b) Provide in the abstract an informative and balanced summary of what was done and what was found                                                                                  | 6                  |
| <b>Introduction</b>          |        |                                                                                                                                                                                      |                    |
| Background/rationale         | 2      | Explain the scientific background and rationale for the investigation being reported                                                                                                 | 8                  |
| Objectives                   | 3      | State specific objectives, including any prespecified hypotheses                                                                                                                     | 9                  |
| <b>Methods</b>               |        |                                                                                                                                                                                      |                    |
| Study design                 | 4      | Present key elements of study design early in the paper                                                                                                                              | 9                  |
| Setting                      | 5      | Describe the setting, locations, and relevant dates, including periods of recruitment, exposure, follow-up, and data collection                                                      | 9-10               |
| Participants                 | 6      | (a) Give the eligibility criteria, and the sources and methods of selection of participants. Describe methods of follow-up                                                           | 10                 |
|                              |        | (b) For matched studies, give matching criteria and number of exposed and unexposed                                                                                                  | 10                 |
| Variables                    | 7      | Clearly define all outcomes, exposures, predictors, potential confounders, and effect modifiers. Give diagnostic criteria, if applicable                                             | 9-10               |
| Data sources/<br>measurement | 8*     | For each variable of interest, give sources of data and details of methods of assessment (measurement). Describe comparability of assessment methods if there is more than one group | 10-11              |
| Bias                         | 9      | Describe any efforts to address potential sources of bias                                                                                                                            | 11                 |
| Study size                   | 10     | Explain how the study size was arrived at                                                                                                                                            | 11                 |
| Quantitative variables       | 11     | Explain how quantitative variables were handled in the analyses. If applicable, describe which groupings were chosen and why                                                         | 12                 |
| Statistical methods          | 12     | (a) Describe all statistical methods, including those used to control for confounding                                                                                                | 12                 |
|                              |        | (b) Describe any methods used to examine subgroups and interactions                                                                                                                  | 12                 |
|                              |        | (c) Explain how missing data were addressed                                                                                                                                          | 12                 |
|                              |        | (d) If applicable, explain how loss to follow-up was addressed                                                                                                                       |                    |
|                              |        | (e) Describe any sensitivity analyses                                                                                                                                                |                    |
| <b>Results</b>               |        |                                                                                                                                                                                      |                    |

|                          |     |                                                                                                                                                                                                              |                     |
|--------------------------|-----|--------------------------------------------------------------------------------------------------------------------------------------------------------------------------------------------------------------|---------------------|
| Participants             | 13* | (a) Report numbers of individuals at each stage of study—eg numbers potentially eligible, examined for eligibility, confirmed eligible, included in the study, completing follow-up, and analysed            | 12                  |
|                          |     | (b) Give reasons for non-participation at each stage                                                                                                                                                         | 12                  |
|                          |     | (c) Consider use of a flow diagram                                                                                                                                                                           | Supplemental Figure |
| Descriptive data         | 14* | (a) Give characteristics of study participants (eg demographic, clinical, social) and information on exposures and potential confounders                                                                     | 12-13               |
|                          |     | (b) Indicate number of participants with missing data for each variable of interest                                                                                                                          | 12                  |
|                          |     | (c) Summarise follow-up time (eg, average and total amount)                                                                                                                                                  | 12                  |
| Outcome data             | 15* | Report numbers of outcome events or summary measures over time                                                                                                                                               | 12-20               |
| Main results             | 16  | (a) Give unadjusted estimates and, if applicable, confounder-adjusted estimates and their precision (eg, 95% confidence interval). Make clear which confounders were adjusted for and why they were included | 18-19               |
|                          |     | (b) Report category boundaries when continuous variables were categorized                                                                                                                                    | N/A                 |
|                          |     | (c) If relevant, consider translating estimates of relative risk into absolute risk for a meaningful time period                                                                                             | N/A                 |
| Other analyses           | 17  | Report other analyses done—eg analyses of subgroups and interactions, and sensitivity analyses                                                                                                               | 14-15               |
| <b>Discussion</b>        |     |                                                                                                                                                                                                              |                     |
| Key results              | 18  | Summarise key results with reference to study objectives                                                                                                                                                     | 21                  |
| <b>Limitations</b>       |     |                                                                                                                                                                                                              |                     |
| Interpretation           | 20  | Give a cautious overall interpretation of results considering objectives, limitations, multiplicity of analyses, results from similar studies, and other relevant evidence                                   | 21-24               |
| Generalisability         | 21  | Discuss the generalisability (external validity) of the study results                                                                                                                                        | 22-24               |
| <b>Other information</b> |     |                                                                                                                                                                                                              |                     |
| Funding                  | 22  | Give the source of funding and the role of the funders for the present study and, if applicable, for the original study on which the present article is based                                                | 26                  |

\*Give information separately for cases and controls in case-control studies and, if applicable, for exposed and unexposed groups in cohort and cross-sectional studies.

**Note:** An Explanation and Elaboration article discusses each checklist item and gives methodological background and published examples of transparent reporting. The STROBE checklist is best used in conjunction with this article (freely available on the Web sites of PLoS Medicine at <http://www.plosmedicine.org/>, Annals of Internal Medicine at <http://www.annals.org/>, and Epidemiology at <http://www.epidem.com/>). Information on the STROBE Initiative is available at [www.strobe-statement.org](http://www.strobe-statement.org).
