# Supplementary material for: Comorbidities, symptoms and end-of-life medication use in hospitalised decedents before and during the COVID-19 pandemic: a retrospective regional cohort study in Ottawa, Canada
Source: PubMed Central journal article supplement — BMJ Open. 2023 Sep 5;13(9):e075518. doi: 10.1136/bmjopen-2023-075518 (PMC10481717; doi:10.1136/bmjopen-2023-075518), 2023-09-05
Supplement: bmjopen-2023-075518supp001.pdf [file bmjopen-2023-075518supp001.pdf]

**Appendix 1 Clinical characteristics as documented at admission, and supportive interventions as documented during admission**

|                                    |
|------------------------------------|
| <b>Comorbidities at admission</b>  |
| COPD                               |
| Asthma                             |
| Heart Failure                      |
| Hypertension                       |
| Atrial fibrillation                |
| Coronary artery disease            |
| Chronic liver disease              |
| Diabetes mellitus                  |
| Chronic kidney disease             |
| Obesity                            |
| HIV infection                      |
| Dementia                           |
| Active cancer                      |
| Other comorbidity                  |
|                                    |
| <b>Symptoms/signs at admission</b> |

|                                                              |
|--------------------------------------------------------------|
| Breathlessness                                               |
| Airway secretions                                            |
| Cough                                                        |
| Agitation                                                    |
| Drowsiness                                                   |
| Pain                                                         |
| Cognitive impairment                                         |
| Fatigue                                                      |
| Fever                                                        |
| Other symptoms                                               |
|                                                              |
| <b>Respiratory/circulatory support used during admission</b> |
| BIPAP                                                        |
| High flow nasal cannula                                      |
| Intubated                                                    |
| Other respiratory support                                    |
| Vasopressor use                                              |
