# Supplementary material for: Comorbidities, symptoms and end-of-life medication use in hospitalised decedents before and during the COVID-19 pandemic: a retrospective regional cohort study in Ottawa, Canada
Source: PubMed Central journal article supplement — BMJ Open. 2023 Sep 5;13(9):e075518. doi: 10.1136/bmjopen-2023-075518 (PMC10481717; doi:10.1136/bmjopen-2023-075518), 2023-09-05
Supplement: bmjopen-2023-075518supp002.pdf [file bmjopen-2023-075518supp002.pdf]

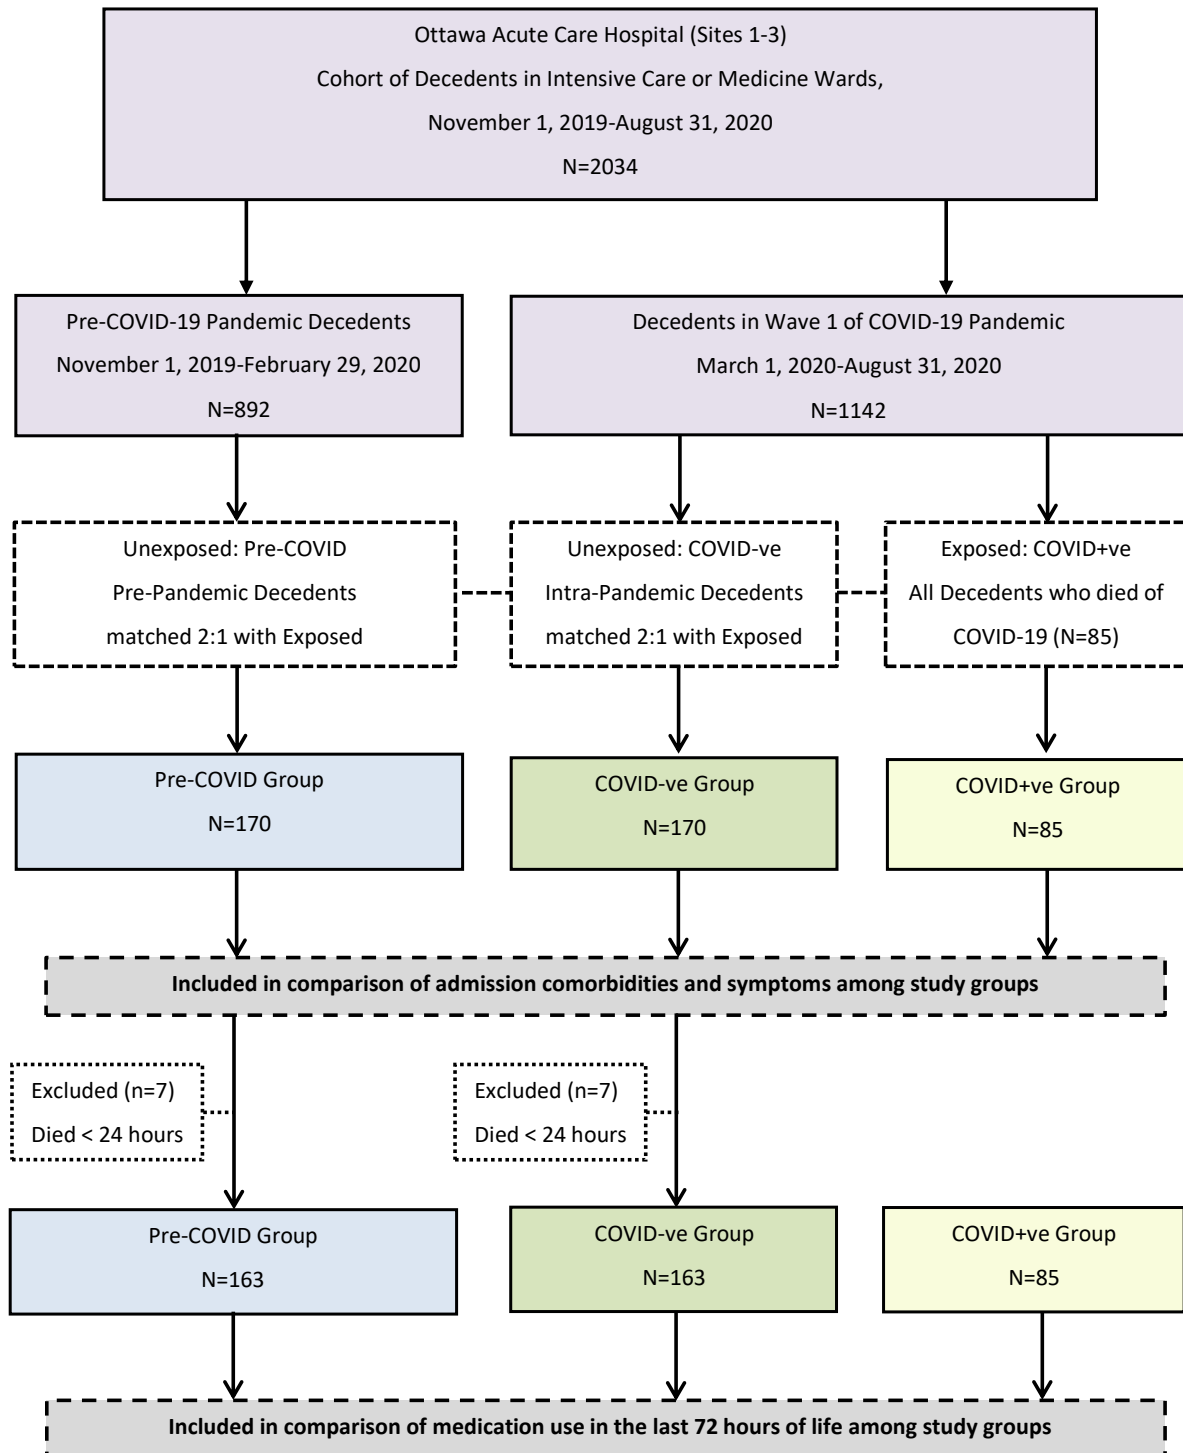

Appendix 2 Supplemental Figure Study Flow Diagram with Study Group Derivation for Comparative Outcomes
