# Supplementary material for: Comorbidities, symptoms and end-of-life medication use in hospitalised decedents before and during the COVID-19 pandemic: a retrospective regional cohort study in Ottawa, Canada
Source: PubMed Central journal article supplement — BMJ Open. 2023 Sep 5;13(9):e075518. doi: 10.1136/bmjopen-2023-075518 (PMC10481717; doi:10.1136/bmjopen-2023-075518), 2023-09-05
Supplement: bmjopen-2023-075518supp003.pdf [file bmjopen-2023-075518supp003.pdf]

**Appendix 3 Supplemental Table Study group comparison of admission clinical characteristics and respiratory/circulatory support use during admission**

| Clinical characteristics           | Time periods and designated study groups |                              |                            | P values         |
|------------------------------------|------------------------------------------|------------------------------|----------------------------|------------------|
|                                    | Nov 2019-Feb 2020                        | Mar 2020 – Aug 2020 (Wave 1) |                            |                  |
|                                    | Pre-COVID Group<br>N=170 (%)             | COVID-ve Group<br>N=170 (%)  | COVID+ve Group<br>N=85 (%) |                  |
| <b>Comorbidities at admission</b>  |                                          |                              |                            |                  |
| <b>COPD</b>                        | 43 (25.3)                                | 49 (28.8)                    | 17 (20.0)                  | 0.312            |
| <b>Asthma</b>                      | 7 (4.1)                                  | 9 (5.3)                      | 3 (3.5)                    | 0.780            |
| <b>Heart Failure</b>               | 40 (23.5)                                | 48 (28.2)                    | 16 (18.8)                  | 0.240            |
| <b>Hypertension</b>                | 95 (55.9)                                | 104 (61.2)                   | 57 (67.1)                  | 0.217            |
| <b>Atrial fibrillation</b>         | <b>45 (26.5)</b>                         | <b>55 (32.4)</b>             | <b>13 (15.3)</b>           | <b>0.015</b>     |
| <b>Coronary artery disease</b>     | 52 (30.6)                                | 52 (30.6)                    | 22 (25.9)                  | 0.697            |
| <b>Chronic liver disease</b>       | 3 (1.8)                                  | 11 (6.5)                     | 3 (3.5)                    | 0.084            |
| <b>Diabetes mellitus</b>           | 48 (28.2)                                | 56 (32.9)                    | 26 (30.6)                  | 0.642            |
| <b>Chronic kidney disease</b>      | 32 (18.8)                                | 38 (22.4)                    | 19 (22.4)                  | 0.681            |
| <b>Obesity</b>                     | 6 (3.5)                                  | 15 (8.8)                     | 4 (4.7)                    | 0.102            |
| <b>HIV infection</b>               | 0 (0.0)                                  | 0 (0.0)                      | 1 (1.2)                    | 0.135            |
| <b>Dementia</b>                    | <b>47 (27.7)</b>                         | <b>44 (25.9)</b>             | <b>35 (41.2)</b>           | <b>0.032</b>     |
| <b>Active cancer</b>               | 44 (25.9)                                | 37 (21.8)                    | 11 (12.9)                  | 0.061            |
| <b>Other comorbidity</b>           | <b>108 (63.5)</b>                        | <b>102 (60.0)</b>            | <b>66 (77.7)</b>           | <b>0.018</b>     |
|                                    |                                          |                              |                            |                  |
| <b>Symptoms/signs at admission</b> |                                          |                              |                            |                  |
| <b>Breathlessness</b>              | <b>72 (42.4)</b>                         | <b>80 (47.1)</b>             | <b>54 (63.5)</b>           | <b>0.006</b>     |
| <b>Airway secretions</b>           | 28 (16.5)                                | 16 (9.4)                     | 7 (8.2)                    | 0.066            |
| <b>Cough</b>                       | <b>46 (27.1)</b>                         | <b>33 (19.4)</b>             | <b>34 (40.0)</b>           | <b>0.002</b>     |
| <b>Agitation</b>                   | 11 (6.5)                                 | 14 (8.2)                     | 10 (11.8)                  | 0.350            |
| <b>Drowsiness</b>                  | 68 (40.0)                                | 57 (33.5)                    | 39 (45.9)                  | 0.143            |
| <b>Pain</b>                        | <b>50 (29.4)</b>                         | <b>49 (28.8)</b>             | <b>9 (10.6)</b>            | <b>0.002</b>     |
| <b>Cognitive impairment</b>        | 57 (33.5)                                | 59 (34.7)                    | 35 (41.2)                  | 0.465            |
| <b>Fatigue</b>                     | 88 (51.8)                                | 83 (48.8)                    | 51 (60.0)                  | 0.239            |
| <b>Fever</b>                       | <b>16 (9.4)</b>                          | <b>23 (13.5)</b>             | <b>46 (54.1)</b>           | <b>&lt;0.001</b> |
| <b>Other symptoms</b>              | 90 (52.9)                                | 79 (46.5)                    | 42 (49.4)                  | 0.490            |

| <b>Respiratory/circulatory support used during admission</b> |                  |                  |                  |                  |
|--------------------------------------------------------------|------------------|------------------|------------------|------------------|
| <b>BIPAP</b>                                                 | 22 (12.9)        | 17 (10.0)        | 4 (4.7)          | 0.121            |
| <b>High flow nasal cannula</b>                               | <b>63 (37.1)</b> | <b>49 (28.8)</b> | <b>46 (54.1)</b> | <b>&lt;0.001</b> |
| <b>Intubated</b>                                             | 45 (26.5)        | 43 (25.3)        | 14 (16.5)        | 0.186            |
| <b>Other respiratory support</b>                             | 50 (29.4)        | 52 (30.6)        | 31 (36.5)        | 0.502            |
| <b>Vasopressor use</b>                                       | 43 (25.3)        | 47 (27.7)        | 13 (15.3)        | 0.087            |
